# Supplementary material for: A Novel Murine Model of Parvovirus Associated Dilated Cardiomyopathy Induced by Immunization with VP1-Unique Region of Parvovirus B19
Source: Biomed Res Int. 2016 Oct 12;2016:1627184. doi: 10.1155/2016/1627184 (PMC5080459; doi:10.1155/2016/1627184)
Supplement: Supplementary file 1 — List of dysregulated genes [file 1627184.f1.xlsx]

## Sheet: Blatt1
Probe Set ID	GeneSymbol	GeneName	UniGeneHsID	EnsemblID	EnzymeID	CHR	CHRLOC	EntrezID	REFSEQID	KEGGID	GOIDCC	GOIDMF	GOIDBP	Unit	N_probes	_Row	GrandMean	ErrorSS	Mean Experiment K	Mean Experiment P	Mean Experiment V	TotalSS	ModelSS	NDF_Experiment	DDF_Experiment	Variance_Residual	Variance_Residual0	OneOverVR0	DDF_Experiment0	SampleVariance	PropVar_Residual	RSquare	F_T3_Experiment	PrF_T3_Experiment	NLP_T3_Experiment	MeanMean	StdDevMean	Std Mean Experiment K	Std Mean Experiment P	Std Mean Experiment V	Diff of Experiment = (K) - (P)	Diff of Experiment = (K) - (V)	Diff of Experiment = (P) - (V)	t Value for Diff of Experiment = (K) - (P)	t Value for Diff of Experiment = (K) - (V)	t Value for Diff of Experiment = (P) - (V)	Prob>|t| for Diff of Experiment = (K) - (P)	Prob>|t| for Diff of Experiment = (K) - (V)	Prob>|t| for Diff of Experiment = (P) - (V)
16071_at	Igkc	immunoglobulin kappa constant	Mm.333124	NA	NA	6	NA	16071	NA	---	---	GO:0046872 - metal ion binding	GO:0030183 - B cell differentiation	5670	21	5670	7.34829	2.42234	6.47659	8.94336	6.40698	18.4231	16.0008	2	8.6993	0.278861	0.302792	3.30259	8	1.84231	1	0.868517	28.6896	0.000147844	3.8302	7.27564	1.4447	-0.553091	1.15437	-0.601274	-2.46677	0.0696097	2.53638	-6.11612	0.172591	6.79258	0.000202186	0.866922	9.37284e-05
22042_at	Tfrc	transferrin receptor	Mm.28683	ENSMUSG00000022797	NA	16	32608896	22042	NM_011638 /// NP_035768 /// XM_006521999 /// XP_006522062	04144 : Endocytosis /// 04145 : Phagosome /// 04640 : Hematopoietic cell lineage	GO:0005886 - plasma membrane /// GO:0005768 - endosome /// GO:0005905 - coated pit /// GO:0009897 - external side of plasma membrane /// GO:0009986 - cell surface /// GO:0048471 - perinuclear region of cytoplasm /// GO:0055037 - recycling endosome /// GO:0070062 - extracellular vesicular exosome /// GO:0005623 - cell /// GO:0016021 - integral component of membrane /// GO:0016020 - membrane /// GO…	GO:0005381 - iron ion transmembrane transporter activity /// GO:0004998 - transferrin receptor activity /// GO:0005515 - protein binding /// GO:0003725 - double-stranded RNA binding /// GO:0051087 - chaperone binding /// GO:0004998 - transferrin receptor activity /// GO:0042802 - identical protein binding /// GO:0030544 - Hsp70 protein binding /// GO:0044822 - poly(A) RNA binding	GO:0006898 - receptor-mediated endocytosis /// GO:0034755 - iron ion transmembrane transport /// GO:0045780 - positive regulation of bone resorption /// GO:0006879 - cellular iron ion homeostasis /// GO:0030316 - osteoclast differentiation /// GO:0006897 - endocytosis /// GO:0033572 - transferrin transport /// GO:0006898 - receptor-mediated endocytosis /// GO:0097286 - iron ion import	9469	34	9469	6.91283	0.170247	5.95967	7.75879	6.78174	5.82714	5.6569	2	8.6993	0.019979	0.0212809	46.9905	8	0.582714	1	0.970784	141.571	2.31154e-07	6.6361	6.8334	0.900674	-0.970088	1.02744	-0.0573561	-1.79912	-0.822073	0.977051	-16.6654	-7.61492	9.77564	6.67423e-08	3.95075e-05	5.53741e-06
107576_at	Tcrg-C4	T cell receptor gamma, constant 4	NA	NA	NA	13	NA	107576	NA	---	-----	-----	-----	2892	17	2892	4.2937	1.15265	3.56633	5.25073	3.8822	7.08081	5.92816	2	8.6993	0.132908	0.144082	6.94051	8	0.708081	1	0.837215	22.3017	0.000376421	3.42433	4.23309	0.895345	-0.744693	1.13659	-0.391901	-1.6844	-0.31587	1.36853	-6.04938	-1.13442	5.30876	0.00021879	0.286909	0.000546535
100125248_at	Trbj1-1	T cell receptor beta joining 1-1	NA	NA	NA	6	NA	100125248	NA	---	-----	-----	-----	660	8	660	3.90802	1.34778	3.34519	4.98462	3.25354	8.64777	7.29999	2	8.6993	0.155339	0.168473	5.93568	8	0.864777	1	0.844147	23.497	0.000311025	3.5072	3.86111	0.974062	-0.529668	1.15342	-0.623754	-1.63943	0.0916452	1.73108	-5.44623	0.304447	6.21144	0.000458531	0.767944	0.000180812
16069_at	Igj	immunoglobulin joining chain	Mm.1192	ENSMUSG00000067149	NA	5	-88519809	16069	NM_152839 /// NP_690052	---	GO:0071750 - dimeric IgA immunoglobulin complex /// GO:0005576 - extracellular region /// GO:0005615 - extracellular space /// GO:0070062 - extracellular vesicular exosome /// GO:0071748 - monomeric IgA immunoglobulin complex /// GO:0071750 - dimeric IgA immunoglobulin complex /// GO:0071751 - secretory IgA immunoglobulin complex /// GO:0071752 - secretory dimeric IgA immunoglobulin complex /// G…	GO:0003823 - antigen binding /// GO:0019862 - IgA binding /// GO:0034987 - immunoglobulin receptor binding /// GO:0003697 - single-stranded DNA binding /// GO:0019862 - IgA binding /// GO:0031210 - phosphatidylcholine binding /// GO:0034987 - immunoglobulin receptor binding /// GO:0042803 - protein homodimerization activity /// GO:0042834 - peptidoglycan binding	GO:0006959 - humoral immune response /// GO:0032461 - positive regulation of protein oligomerization /// GO:0002250 - adaptive immune response /// GO:0003094 - glomerular filtration /// GO:0019731 - antibacterial humoral response /// GO:0032461 - positive regulation of protein oligomerization /// GO:0045087 - innate immune response /// GO:0060267 - positive regulation of respiratory burst	5669	27	5669	3.23179	1.20827	2.65703	4.22925	2.66541	7.46216	6.25389	2	8.6993	0.139302	0.151034	6.62103	8	0.746216	1	0.83808	22.4473	0.000367606	3.43462	3.1839	0.905311	-0.581967	1.15469	-0.572721	-1.57221	-0.00837106	1.56384	-5.51537	-0.0293659	5.92557	0.00042019	0.977235	0.000253676
17392_at	Mmp3	matrix metallopeptidase 3	Mm.4993	ENSMUSG00000043613	NA	9	7445822	17392	NM_010809 /// NP_034939	05323 : Rheumatoid arthritis	GO:0005576 - extracellular region /// GO:0005578 - proteinaceous extracellular matrix /// GO:0031012 - extracellular matrix /// GO:0005615 - extracellular space /// GO:0005634 - nucleus /// GO:0030425 - dendrite /// GO:0043234 - protein complex /// GO:0044297 - cell body	GO:0005509 - calcium ion binding /// GO:0004222 - metalloendopeptidase activity /// GO:0008237 - metallopeptidase activity /// GO:0008233 - peptidase activity /// GO:0046872 - metal ion binding /// GO:0008270 - zinc ion binding /// GO:0016787 - hydrolase activity /// GO:0004175 - endopeptidase activity /// GO:0032403 - protein complex binding	GO:0071230 - cellular response to amino acid stimulus /// GO:0030334 - regulation of cell migration /// GO:0030574 - collagen catabolic process /// GO:0006508 - proteolysis /// GO:0010727 - negative regulation of hydrogen peroxide metabolic process /// GO:0030335 - positive regulation of cell migration	6487	23	6487	4.55029	0.950722	3.98127	5.4314	4.09595	5.85318	4.90246	2	8.6993	0.109696	0.11884	8.41466	8	0.585318	1	0.837572	22.3457	0.00037373	3.42744	4.50287	0.806169	-0.647014	1.15178	-0.504762	-1.45013	-0.11468	1.33545	-5.73262	-0.453348	5.70226	0.000320737	0.661394	0.000332945
12845_at	Comp	cartilage oligomeric matrix protein	Mm.45071	ENSMUSG00000031849	NA	8	70373548	12845	NM_016685 /// NP_057894 /// XM_006509539 /// XP_006509602	04145 : Phagosome /// 04350 : TGF-beta signaling pathway /// 04510 : Focal adhesion /// 04512 : ECM-receptor interaction /// 05144 : Malaria	GO:0005576 - extracellular region /// GO:0005578 - proteinaceous extracellular matrix /// GO:0005615 - extracellular space /// GO:0031012 - extracellular matrix /// GO:0070062 - extracellular vesicular exosome	GO:0005515 - protein binding /// GO:0002020 - protease binding /// GO:0005509 - calcium ion binding /// GO:0001968 - fibronectin binding /// GO:0002020 - protease binding /// GO:0005201 - extracellular matrix structural constituent /// GO:0005499 - vitamin D binding /// GO:0005518 - collagen binding /// GO:0008201 - heparin binding /// GO:0043395 - heparan sulfate proteoglycan binding	GO:0003417 - growth plate cartilage development /// GO:0003417 - growth plate cartilage development /// GO:0006915 - apoptotic process /// GO:0007155 - cell adhesion /// GO:0043066 - negative regulation of apoptotic process /// GO:0030198 - extracellular matrix organization /// GO:0060173 - limb development	4286	31	4286	4.77593	0.821961	4.29136	5.64771	4.26758	5.60005	4.77809	2	8.6993	0.0948946	0.102745	9.73282	8	0.560005	1	0.853223	25.1758	0.00024111	3.61779	4.73555	0.790042	-0.562236	1.15457	-0.592333	-1.35635	0.0237778	1.38013	-5.76491	0.101063	6.33597	0.000308284	0.921791	0.000156522
56437_at	Rrad	Ras-related associated with diabetes	Mm.29467	ENSMUSG00000031880	NA	8	-104628066	56437	NM_019662 /// NP_062636 /// XM_006531206 /// XP_006531269	---	GO:0005886 - plasma membrane /// GO:0016020 - membrane	GO:0005515 - protein binding /// GO:0000166 - nucleotide binding /// GO:0005516 - calmodulin binding /// GO:0005525 - GTP binding	GO:0007165 - signal transduction /// GO:0006184 - GTP catabolic process /// GO:0007264 - small GTPase mediated signal transduction /// GO:0030308 - negative regulation of cell growth	17026	23	17026	8.39011	0.356797	7.29173	8.62061	8.9834	5.59662	5.23982	2	8.6993	0.0414232	0.0445996	22.4217	8	0.559662	1	0.936248	63.2474	6.56914e-06	5.18249	8.29858	0.890627	-1.1305	0.361576	0.768921	-1.32888	-1.69167	-0.362793	-8.5488	-10.8827	-2.52088	1.60876e-05	2.32193e-06	0.0335549
16019_at	Ighm	immunoglobulin heavy constant mu	Mm.304472; Mm.313488; Mm.342177; Mm.428442; Mm.435580; Mm.436922; Mm.439101	NA	NA	12	NA	16019	NA	---	GO:0005615 - extracellular space /// GO:0009897 - external side of plasma membrane /// GO:0019815 - B cell receptor complex /// GO:0042571 - immunoglobulin complex, circulating /// GO:0048471 - perinuclear region of cytoplasm /// GO:0005886 - plasma membrane /// GO:0016021 - integral component of membrane /// GO:0016020 - membrane /// GO:0005576 - extracellular region	GO:0003823 - antigen binding /// GO:0004888 - transmembrane signaling receptor activity /// GO:0005515 - protein binding	GO:0000187 - activation of MAPK activity /// GO:0002455 - humoral immune response mediated by circulating immunoglobulin /// GO:0016064 - immunoglobulin mediated immune response /// GO:0019882 - antigen processing and presentation /// GO:0030890 - positive regulation of B cell proliferation /// GO:0043410 - positive regulation of MAPK cascade /// GO:0045022 - early endosome to late endosome trans…	5667	21	5667	6.70559	0.336168	5.90779	7.22217	6.78735	3.33978	3.00361	2	8.6993	0.0390518	0.0420209	23.7977	8	0.333978	1	0.899344	38.4568	4.79249e-05	4.31944	6.6391	0.669613	-1.09215	0.870748	0.221397	-1.31438	-0.879565	0.434814	-8.70846	-5.82759	3.1117	1.39067e-05	0.000285588	0.0130052
73010_at	Gpr22	G protein-coupled receptor 22	Mm.441517	ENSMUSG00000044067	NA	12	-31706867	73010	NM_175191 /// NP_780400	---	GO:0005886 - plasma membrane /// GO:0016021 - integral component of membrane /// GO:0016020 - membrane	GO:0004871 - signal transducer activity /// GO:0004930 - G-protein coupled receptor activity	GO:0007165 - signal transduction /// GO:0007186 - G-protein coupled receptor signaling pathway	22211	20	22211	6.72381	0.193007	6.13118	7.19312	6.69897	2.13008	1.93707	2	8.6993	0.0225952	0.0241258	41.4493	8	0.213008	1	0.90939	42.8646	3.12911e-05	4.50458	6.67442	0.531391	-1.0223	0.9761	0.046199	-1.06193	-0.56779	0.494141	-9.24973	-4.94562	4.64897	8.62141e-06	0.000880307	0.00131787
26399_at	Map2k6	mitogen-activated protein kinase kinase	Mm.14487	ENSMUSG00000020623	2.7.12.2	11	110399122	26399	NM_011943 /// NP_036073 /// XM_006533375 /// XM_006533376 /// XM_006533377 /// XM_006533378 /// XP_006533438 /// XP_006533439 /// XP_006533440 /// XP_006533441	04010 : MAPK signaling pathway /// 04380 : Osteoclast differentiation /// 04620 : Toll-like receptor signaling pathway /// 04664 : Fc epsilon RI signaling pathway /// 04912 : GnRH signaling pathway /// 05014 : Amyotrophic lateral sclerosis (ALS) /// 05145 : Toxoplasmosis	GO:0005622 - intracellular /// GO:0005737 - cytoplasm /// GO:0005634 - nucleus /// GO:0005856 - cytoskeleton	GO:0005515 - protein binding /// GO:0004702 - receptor signaling protein serine/threonine kinase activity /// GO:0004708 - MAP kinase kinase activity /// GO:0000166 - nucleotide binding /// GO:0004672 - protein kinase activity /// GO:0004674 - protein serine/threonine kinase activity /// GO:0004713 - protein tyrosine kinase activity /// GO:0005524 - ATP binding /// GO:0016301 - kinase activity //…	GO:0000187 - activation of MAPK activity /// GO:0006468 - protein phosphorylation /// GO:0000187 - activation of MAPK activity /// GO:0060048 - cardiac muscle contraction /// GO:0000165 - MAPK cascade /// GO:0000165 - MAPK cascade /// GO:0000187 - activation of MAPK activity /// GO:0006468 - protein phosphorylation /// GO:0006950 - response to stress /// GO:0006915 - apoptotic process /// GO:0006…	13142	20	13142	5.16556	0.28574	4.5947	5.63892	5.12036	2.16783	1.88209	2	8.6993	0.0332551	0.0357175	27.9975	8	0.216783	1	0.868191	28.2977	0.000155719	3.80766	5.11799	0.522114	-1.00226	0.997723	0.00453903	-1.04422	-0.525664	0.518555	-7.49729	-3.77417	4.02143	4.45074e-05	0.00466556	0.00322791
110763_at	Igkj5	immunoglobulin kappa joining 5	NA	NA	NA	6	NA	110763	NA	---	-----	-----	-----	3246	6	3246	7.57677	0.429403	7.13533	8.17773	7.30688	2.75	2.3206	2	8.6993	0.0497694	0.0536753	18.6305	8	0.275	1	0.843854	23.3135	0.000320099	3.49472	7.53998	0.558931	-0.723979	1.14102	-0.417042	-1.04241	-0.171557	0.87085	-6.11783	-1.00686	5.52048	0.000201779	0.341185	0.000417498
100216533_at	Snord55	small nucleolar RNA, C/D box 55	NA	NA	NA	4	-117155771	100216533	NR_030704	---	GO:0005575 - cellular_component	GO:0003674 - molecular_function	GO:0008150 - biological_process	738	23	738	10.9213	0.247514	10.5356	11.4424	10.6895	1.995	1.74748	2	8.6993	0.0288609	0.0309392	32.3215	8	0.1995	1	0.875933	30.2742	0.000120589	3.91869	10.8891	0.485265	-0.728602	1.14009	-0.411492	-0.906812	-0.153883	0.75293	-6.98882	-1.18598	6.26779	7.57557e-05	0.267012	0.000169344
100217432_at	Snord71	small nucleolar RNA, C/D box 71	NA	NA	NA	8	109839312	100217432	NR_028532	---	GO:0005575 - cellular_component	GO:0003674 - molecular_function	GO:0008150 - biological_process	762	11	762	10.0528	0.400978	9.75982	10.6294	9.6958	2.49812	2.09714	2	8.6993	0.0465019	0.0501222	19.9512	8	0.249812	1	0.839488	22.549	0.000361597	3.44178	10.0283	0.521512	-0.514878	1.15252	-0.637645	-0.86957	0.064024	0.933594	-5.27972	0.388731	6.12263	0.000567382	0.706818	0.000200643
18826_at	Lcp1	lymphocyte cytosolic protein 1	Mm.153911; Mm.484415	ENSMUSG00000021998	NA	14	75131123; 75136425	18826	NM_001247984 /// NM_008879 /// NP_001234913 /// NP_032905 /// XM_006518699 /// XM_006518700 /// XM_006518701 /// XM_006518702 /// XM_006518703 /// XM_006518704 /// XP_006518762 /// XP_006518763 /// XP_006518764 /// XP_006518765 /// XP_006518766 /// XP_006518767	---	GO:0001726 - ruffle /// GO:0001891 - phagocytic cup /// GO:0005737 - cytoplasm /// GO:0005884 - actin filament /// GO:0016020 - membrane /// GO:0005856 - cytoskeleton /// GO:0030054 - cell junction /// GO:0042995 - cell projection /// GO:0005886 - plasma membrane /// GO:0001725 - stress fiber /// GO:0001726 - ruffle /// GO:0005829 - cytosol /// GO:0005615 - extracellular space /// GO:0005737 - cy…	GO:0051015 - actin filament binding /// GO:0005515 - protein binding /// GO:0042802 - identical protein binding /// GO:0005509 - calcium ion binding /// GO:0003779 - actin binding /// GO:0046872 - metal ion binding /// GO:0051015 - actin filament binding	GO:0051017 - actin filament bundle assembly /// GO:0002286 - T cell activation involved in immune response /// GO:0051017 - actin filament bundle assembly /// GO:0009611 - response to wounding /// GO:0010737 - protein kinase A signaling /// GO:0016477 - cell migration /// GO:0033157 - regulation of intracellular protein transport	7135	15	7135	7.80085	0.285908	7.36873	8.22461	7.70117	1.60413	1.31822	2	8.6993	0.0332744	0.0357385	27.981	8	0.160413	1	0.821768	19.8084	0.000577059	3.23878	7.76484	0.431479	-0.918028	1.06558	-0.147548	-0.855883	-0.332446	0.523438	-6.14329	-2.3862	4.05812	0.000195826	0.0417197	0.00305843
100217437_at	Snord99	small nucleolar RNA, C/D box 99	NA	NA	NA	4	132310703	100217437	NR_028537	---	GO:0005575 - cellular_component	GO:0003674 - molecular_function	GO:0008150 - biological_process	766	24	766	11.3168	0.287676	10.7431	11.5869	11.4771	1.66952	1.38184	2	8.6993	0.0334776	0.0359595	27.8091	8	0.166952	1	0.82769	20.6383	0.000498208	3.30259	11.269	0.458742	-1.14639	0.69294	0.453452	-0.84378	-0.733916	0.109863	-6.03801	-5.25183	0.849162	0.000221766	0.00058821	0.418545
73910_at	Arhgap18	Rho GTPase activating protein 18	Mm.356496	ENSMUSG00000039031	NA	10	26772512	73910	NM_176837 /// NP_789807 /// XM_006512885 /// XP_006512948	---	GO:0005622 - intracellular	GO:0003674 - molecular_function /// GO:0005096 - GTPase activator activity	GO:0007165 - signal transduction	22563	33	22563	6.7065	0.103954	6.03939	6.86743	7.0459	2.00343	1.89948	2	8.6993	0.0123584	0.0129942	76.9573	8	0.200343	1	0.948112	76.8494	2.95921e-06	5.52882	6.65091	0.537055	-1.13865	0.403172	0.735478	-0.828044	-1.00651	-0.178467	-9.75243	-11.8544	-2.27034	5.64424e-06	1.15154e-06	0.0503071
434215_at	Lrrc32	leucine rich repeat containing 32	Mm.323057	ENSMUSG00000090958	NA	7	98494222	434215	NM_001113379 /// NP_001106850 /// XM_006507976 /// XM_006507977 /// XM_006507978 /// XM_006507979 /// XM_006544223 /// XM_006544224 /// XM_006544225 /// XM_006544226 /// XP_006508039 /// XP_006508040 /// XP_006508041 /// XP_006508042 /// XP_006544286 /// XP_006544287 /// XP_006544288 /// XP_006544289	---	---	---	GO:0010628 - positive regulation of gene expression /// GO:0046007 - negative regulation of activated T cell proliferation /// GO:0050710 - negative regulation of cytokine secretion	15892	23	15892	6.05459	0.266358	5.62334	6.44653	5.98608	1.45753	1.19117	2	8.6993	0.0310271	0.0332947	30.0348	8	0.145753	1	0.817254	19.1957	0.000645275	3.19026	6.01865	0.412561	-0.958188	1.03713	-0.0789444	-0.82319	-0.362741	0.460449	-6.11888	-2.6963	3.6968	0.000201531	0.0252766	0.00524441
216864_at	Mgl2	macrophage galactose N-acetyl-galactosam	Mm.222465	ENSMUSG00000040950	NA	11	70130357	216864	NM_145137 /// NP_660119 /// XM_006532912 /// XM_006532913 /// XM_006532914 /// XM_006532915 /// XM_006537153 /// XM_006537154 /// XM_006537155 /// XM_006537156 /// XP_006532975 /// XP_006532976 /// XP_006532977 /// XP_006532978 /// XP_006537216 /// XP_006537217 /// XP_006537218 /// XP_006537219	---	---	GO:0030246 - carbohydrate binding	---	9052	11	9052	5.19475	0.151329	4.93575	5.74487	4.83887	2.06972	1.91839	2	8.6993	0.0178044	0.0189162	52.8648	8	0.206972	1	0.926884	53.8741	1.25743e-05	4.90052	5.17316	0.497478	-0.477228	1.14921	-0.671984	-0.809119	0.0968868	0.906006	-7.93946	0.950699	9.60247	2.86432e-05	0.36742	6.39199e-06
218763_at	Lrrc3b	leucine rich repeat containing 3B	Mm.138039	ENSMUSG00000045201	NA	14	-15357516	218763	NM_146052 /// NP_666164 /// XM_006518005 /// XM_006518006 /// XP_006518068 /// XP_006518069	---	GO:0016021 - integral component of membrane /// GO:0016020 - membrane	GO:0003674 - molecular_function	GO:0008150 - biological_process	9330	20	9330	6.16685	0.117005	5.6733	6.42603	6.27783	1.16575	1.04874	2	8.6993	0.0138587	0.0146257	68.3729	8	0.116575	1	0.899631	37.8369	5.10639e-05	4.29189	6.12572	0.398754	-1.13459	0.753116	0.381474	-0.75273	-0.604537	0.148193	-8.3718	-6.72361	1.78025	1.89564e-05	0.000101117	0.109888
19659_at	Rbp1	retinol binding protein 1, cellular	Mm.279741	ENSMUSG00000046402	NA	9	98422961	19659	NM_011254 /// NP_035384	---	GO:0005737 - cytoplasm /// GO:0005829 - cytosol /// GO:0044297 - cell body	GO:0005501 - retinoid binding /// GO:0005215 - transporter activity /// GO:0008289 - lipid binding /// GO:0016918 - retinal binding /// GO:0019841 - retinol binding	GO:0030852 - regulation of granulocyte differentiation /// GO:0033189 - response to vitamin A /// GO:0042572 - retinol metabolic process /// GO:0042573 - retinoic acid metabolic process /// GO:0042572 - retinol metabolic process /// GO:0042573 - retinoic acid metabolic process /// GO:0006810 - transport /// GO:0042572 - retinol metabolic process	7576	26	7576	7.91253	0.2718	7.66625	8.41162	7.59814	1.84548	1.57368	2	8.6993	0.0316526	0.033975	29.4334	8	0.184548	1	0.852721	24.8586	0.000252708	3.59738	7.89201	0.451287	-0.500245	1.15141	-0.651164	-0.745369	0.0681078	0.813477	-5.48539	0.501226	6.46629	0.000436368	0.628649	0.000134867
102639412_at	LOC102639412	zinc finger protein 91-like	NA	NA	NA	2	NA	102639412	XR_387515	---	-----	-----	-----	2402	4	2402	7.30552	0.156731	7.01574	7.74512	7.08325	1.37924	1.22251	2	8.6993	0.0184253	0.0195914	51.0428	8	0.137924	1	0.886364	33.1747	8.49853e-05	4.07066	7.28137	0.403032	-0.659073	1.15064	-0.491571	-0.729374	-0.0675086	0.661865	-7.03533	-0.651168	6.89568	7.20746e-05	0.531759	8.37647e-05
72512_at	Tmem173	transmembrane protein 173	Mm.45995	ENSMUSG00000024349	NA	18	-35733678	72512	NM_001289591 /// NM_001289592 /// NM_028261 /// NP_001276520 /// NP_001276521 /// NP_082537 /// XM_006526283 /// XP_006526346	04622 : RIG-I-like receptor signaling pathway /// 04623 : Cytosolic DNA-sensing pathway	GO:0005783 - endoplasmic reticulum /// GO:0005777 - peroxisome /// GO:0005789 - endoplasmic reticulum membrane /// GO:0005794 - Golgi apparatus /// GO:0048471 - perinuclear region of cytoplasm /// GO:0005886 - plasma membrane /// GO:0016021 - integral component of membrane /// GO:0016020 - membrane /// GO:0005739 - mitochondrion /// GO:0005737 - cytoplasm /// GO:0005741 - mitochondrial outer memb…	GO:0035438 - cyclic-di-GMP binding /// GO:0061507 - cyclic-GMP-AMP binding /// GO:0005515 - protein binding /// GO:0031625 - ubiquitin protein ligase binding /// GO:0000166 - nucleotide binding /// GO:0008134 - transcription factor binding /// GO:0042802 - identical protein binding /// GO:0019901 - protein kinase binding /// GO:0035438 - cyclic-di-GMP binding /// GO:0042803 - protein homodimeriza…	GO:0045944 - positive regulation of transcription from RNA polymerase II promoter /// GO:0002218 - activation of innate immune response /// GO:0032608 - interferon-beta production /// GO:0035458 - cellular response to interferon-beta /// GO:0045087 - innate immune response /// GO:0051607 - defense response to virus /// GO:0002376 - immune system process /// GO:0006915 - apoptotic process /// GO:0…	22059	25	22059	5.64498	0.186219	5.2445	5.95825	5.63208	1.0606	0.874386	2	8.6993	0.0218149	0.0232773	42.9602	8	0.10606	1	0.824422	20.041	0.0005535	3.25688	5.61161	0.357318	-1.02741	0.970123	0.0572902	-0.713756	-0.387584	0.326172	-6.32724	-3.43582	3.12309	0.000158102	0.00782536	0.0127729
50490_at	Nox4	NADPH oxidase 4	Mm.31748	ENSMUSG00000030562	NA	7	87246795	50490	NM_001285833 /// NM_001285835 /// NM_015760 /// NP_001272762 /// NP_001272764 /// NP_056575 /// XM_006508010 /// XM_006508011 /// XM_006508012 /// XP_006508073 /// XP_006508074 /// XP_006508075	---	GO:0048471 - perinuclear region of cytoplasm /// GO:0071944 - cell periphery /// GO:0005886 - plasma membrane /// GO:0016021 - integral component of membrane /// GO:0016020 - membrane /// GO:0005783 - endoplasmic reticulum /// GO:0030054 - cell junction /// GO:0001725 - stress fiber /// GO:0005739 - mitochondrion /// GO:0005925 - focal adhesion /// GO:0016324 - apical plasma membrane /// GO:00430…	GO:0016175 - superoxide-generating NADPH oxidase activity /// GO:0016491 - oxidoreductase activity /// GO:0016174 - NAD(P)H oxidase activity /// GO:0050664 - oxidoreductase activity, acting on NAD(P)H, oxygen as acceptor /// GO:0072341 - modified amino acid binding	GO:0042554 - superoxide anion generation /// GO:0000902 - cell morphogenesis /// GO:0055114 - oxidation-reduction process /// GO:0072593 - reactive oxygen species metabolic process /// GO:0007569 - cell aging /// GO:0008285 - negative regulation of cell proliferation /// GO:0043406 - positive regulation of MAP kinase activity /// GO:0045453 - bone resorption /// GO:0051897 - positive regulation o…	16069	20	16069	3.98823	0.516146	3.86441	4.56787	3.50146	2.85384	2.33769	2	8.6993	0.0597407	0.0645183	15.4995	8	0.285384	1	0.81914	19.5653	0.000603005	3.21968	3.97791	0.542189	-0.209352	1.0881	-0.878751	-0.703465	0.362941	1.06641	-3.76833	1.94421	6.17025	0.00470676	0.084857	0.00018973
73690_at	Glipr1	GLI pathogenesis-related 1 (glioma)	Mm.173790	ENSMUSG00000056888	NA	10	-111985448	73690	NM_028608 /// NP_082884 /// XM_006514217 /// XM_006514218 /// XP_006514280 /// XP_006514281	---	GO:0016021 - integral component of membrane /// GO:0005576 - extracellular region /// GO:0016020 - membrane	---	---	22480	22	22480	5.10813	0.29882	4.90658	5.60547	4.76196	1.8894	1.59058	2	8.6993	0.0347587	0.0373525	26.772	8	0.18894	1	0.841844	22.8804	0.000342843	3.4649	5.09134	0.451085	-0.409591	1.13977	-0.730179	-0.698893	0.144613	0.843506	-4.90819	1.01559	6.3984	0.000925639	0.337238	0.000145707
235527_at	Plscr4	phospholipid scramblase 4	Mm.55289	ENSMUSG00000032377	NA	9	92457378	235527	NM_178711 /// NP_848826 /// XM_006511130 /// XP_006511193	---	GO:0016021 - integral component of membrane /// GO:0016020 - membrane /// GO:0005886 - plasma membrane /// GO:0070062 - extracellular vesicular exosome	GO:0019899 - enzyme binding /// GO:0042609 - CD4 receptor binding	GO:0008150 - biological_process	11056	19	11056	5.22901	0.132075	4.93638	5.63403	5.04346	1.18288	1.0508	2	8.6993	0.0155911	0.0165094	60.5714	8	0.118288	1	0.888344	33.6988	8.00097e-05	4.09686	5.20462	0.375716	-0.713962	1.14292	-0.428955	-0.697658	-0.107082	0.590576	-7.31553	-1.12284	6.68887	5.36559e-05	0.291537	0.000105078
21366_at	Slc6a6	solute carrier family 6 (neurotransmitte	Mm.395650	ENSMUSG00000030096	NA	6	91684067	21366	NM_009320 /// NP_033346 /// XM_006505868 /// XM_006505869 /// XM_006505870 /// XM_006505871 /// XP_006505931 /// XP_006505932 /// XP_006505933 /// XP_006505934 /// XR_377434	---	GO:0005887 - integral component of plasma membrane /// GO:0005886 - plasma membrane /// GO:0016021 - integral component of membrane /// GO:0016020 - membrane	GO:0001761 - beta-alanine transmembrane transporter activity /// GO:0005368 - taurine transmembrane transporter activity /// GO:0005328 - neurotransmitter:sodium symporter activity /// GO:0015293 - symporter activity /// GO:0005369 - taurine:sodium symporter activity /// GO:0030977 - taurine binding	GO:0001762 - beta-alanine transport /// GO:0003333 - amino acid transmembrane transport /// GO:0015734 - taurine transport /// GO:0015734 - taurine transport /// GO:0006810 - transport /// GO:0006836 - neurotransmitter transport /// GO:0015734 - taurine transport /// GO:0015849 - organic acid transport /// GO:0035725 - sodium ion transmembrane transport	8695	23	8695	8.15857	0.168714	7.66214	8.35107	8.33838	1.1856	1.01689	2	8.6993	0.0198027	0.0210892	47.4176	8	0.11856	1	0.857698	25.6755	0.000224136	3.64949	8.1172	0.394143	-1.15455	0.59338	0.56117	-0.688935	-0.67624	0.0126953	-6.40999	-6.29187	0.127584	0.000143791	0.000164689	0.901379
245522_at	Zc4h2	zinc finger, C4H2 domain containing	Mm.336158	ENSMUSG00000035062	NA	X	-95639197	245522	NM_001003916 /// NM_001289696 /// NM_001289697 /// NP_001003916 /// NP_001276625 /// NP_001276626	---	GO:0005886 - plasma membrane /// GO:0016020 - membrane /// GO:0030054 - cell junction /// GO:0045202 - synapse /// GO:0005634 - nucleus /// GO:0005737 - cytoplasm /// GO:0045211 - postsynaptic membrane	GO:0003674 - molecular_function /// GO:0046872 - metal ion binding	GO:0007275 - multicellular organismal development /// GO:0007399 - nervous system development	12016	18	12016	5.23429	0.187716	4.88216	5.56714	5.16553	1.02177	0.83405	2	8.6993	0.021987	0.0234645	42.6176	8	0.102177	1	0.816283	18.9668	0.000673281	3.1718	5.20494	0.344185	-0.937811	1.05233	-0.114517	-0.684977	-0.283366	0.401611	-6.04831	-2.50211	3.83034	0.000219068	0.034589	0.00428783
18295_at	Ogn	osteoglycin	Mm.4258; Mm.470076	ENSMUSG00000021390	NA	13	49608071	18295	NM_008760 /// NP_032786	---	GO:0005576 - extracellular region /// GO:0005578 - proteinaceous extracellular matrix /// GO:0005615 - extracellular space /// GO:0031012 - extracellular matrix /// GO:0031982 - vesicle /// GO:0070062 - extracellular vesicular exosome	GO:0008083 - growth factor activity	---	6833	23	6833	9.68229	0.306114	9.48414	10.1592	9.354	1.76469	1.45857	2	8.6993	0.0355971	0.0382642	26.1341	8	0.176469	1	0.826534	20.4873	0.000511523	3.29114	9.66577	0.432228	-0.420232	1.14154	-0.72131	-0.675041	0.130134	0.805176	-4.68452	0.90308	6.0353	0.00125482	0.390804	0.000222481
16168_at	Il15	interleukin 15	Mm.4392; Mm.490053	ENSMUSG00000031712	NA	8	-82331624	16168	NM_001254747 /// NM_008357 /// NP_001241676 /// NP_032383 /// XM_006530705 /// XM_006530706 /// XM_006530707 /// XM_006530708 /// XM_006530709 /// XM_006530710 /// XM_006530711 /// XM_006530712 /// XM_006530713 /// XM_006530714 /// XM_006530715 /// XP_006530768 /// XP_006530769 /// XP_006530770 /// XP_006530771 /// XP_006530772 /// XP_006530773 /// XP_006530774 /// XP_006530775 /// XP_006530776 /…	04060 : Cytokine-cytokine receptor interaction /// 04630 : Jak-STAT signaling pathway /// 04672 : Intestinal immune network for IgA production /// 05323 : Rheumatoid arthritis	GO:0005737 - cytoplasm /// GO:0005576 - extracellular region /// GO:0005615 - extracellular space /// GO:0005634 - nucleus /// GO:0005737 - cytoplasm /// GO:0009986 - cell surface	GO:0005125 - cytokine activity /// GO:0005125 - cytokine activity /// GO:0005126 - cytokine receptor binding	GO:0032819 - positive regulation of natural killer cell proliferation /// GO:0032825 - positive regulation of natural killer cell differentiation /// GO:0001866 - NK T cell proliferation /// GO:0048535 - lymph node development /// GO:0032825 - positive regulation of natural killer cell differentiation /// GO:0042102 - positive regulation of T cell proliferation /// GO:0045062 - extrathymic T cell…	5691	25	5691	5.41867	0.0982671	5.05563	5.7168	5.39282	0.851842	0.753575	2	8.6993	0.0117048	0.0122834	81.4107	8	0.0851842	1	0.884642	32.191	9.53944e-05	4.02048	5.38842	0.330603	-1.00659	0.993272	0.0133223	-0.661162	-0.337188	0.323975	-8.00145	-4.08068	4.23492	2.69682e-05	0.00295894	0.00236478
17967_at	Ncam1	neural cell adhesion molecule 1	Mm.4974; Mm.439182	ENSMUSG00000039542	NA	9	-49502146; -49515139	17967	NM_001081445 /// NM_001113204 /// NM_010875 /// NP_001074914 /// NP_001106675 /// NP_035005 /// XM_006510055 /// XM_006510056 /// XM_006510057 /// XM_006510058 /// XM_006510059 /// XM_006510060 /// XM_006510061 /// XM_006510062 /// XM_006510063 /// XM_006510064 /// XM_006510065 /// XM_006510066 /// XM_006510067 /// XM_006510068 /// XM_006510069 /// XM_006510070 /// XM_006510071 /// XM_006510072 /…	04514 : Cell adhesion molecules (CAMs) /// 05020 : Prion diseases	GO:0005911 - cell-cell junction /// GO:0009897 - external side of plasma membrane /// GO:0030424 - axon /// GO:0030426 - growth cone /// GO:0043025 - neuronal cell body /// GO:0016021 - integral component of membrane /// GO:0031225 - anchored component of membrane /// GO:0005886 - plasma membrane /// GO:0016020 - membrane /// GO:0005737 - cytoplasm /// GO:0009897 - external side of plasma membran…	GO:0005515 - protein binding /// GO:0008201 - heparin binding /// GO:0042802 - identical protein binding /// GO:0019902 - phosphatase binding /// GO:0030275 - LRR domain binding	GO:0007166 - cell surface receptor signaling pathway /// GO:0050850 - positive regulation of calcium-mediated signaling /// GO:0001928 - regulation of exocyst assembly /// GO:0034109 - homotypic cell-cell adhesion /// GO:0031175 - neuron projection development /// GO:0007155 - cell adhesion /// GO:0007568 - aging /// GO:0007611 - learning or memory /// GO:0010288 - response to lead ion /// GO:001…	6647	22	6647	5.54211	0.191488	5.29827	5.93945	5.32764	1.18539	0.993901	2	8.6993	0.0224206	0.023936	41.7781	8	0.118539	1	0.83846	22.1649	0.000384943	3.4146	5.52179	0.362009	-0.617441	1.15375	-0.536309	-0.641187	-0.0293709	0.611816	-5.60664	-0.256823	5.77846	0.000374826	0.803286	0.000303215
72318_at	Cyth4	cytohesin 4	Mm.32911	ENSMUSG00000018008	NA	15	78597047	72318	NM_028195 /// NP_082471 /// XM_006521446 /// XP_006521509	---	GO:0005886 - plasma membrane /// GO:0016020 - membrane /// GO:0005886 - plasma membrane	GO:0005086 - ARF guanyl-nucleotide exchange factor activity /// GO:0005085 - guanyl-nucleotide exchange factor activity /// GO:0008289 - lipid binding /// GO:0005086 - ARF guanyl-nucleotide exchange factor activity	GO:0030155 - regulation of cell adhesion /// GO:0043547 - positive regulation of GTPase activity /// GO:0032012 - regulation of ARF protein signal transduction /// GO:0043547 - positive regulation of GTPase activity	21844	14	21844	6.18471	0.138654	5.81007	6.44409	6.2063	0.830692	0.692038	2	8.6993	0.0163473	0.0173318	57.6976	8	0.0830692	1	0.833086	21.1667	0.000454864	3.34212	6.15349	0.320291	-1.07219	0.907311	0.164884	-0.634018	-0.396225	0.237793	-6.49263	-4.05752	2.63021	0.000130901	0.0030611	0.0281207
66102_at	Cxcl16	chemokine (C-X-C motif) ligand 16	Mm.425692	ENSMUSG00000018920	NA	11	-70454234	66102	NM_023158 /// NP_075647 /// XM_006533920 /// XM_006537201 /// XP_006533983 /// XP_006537264 /// XR_388507 /// XR_390230	04060 : Cytokine-cytokine receptor interaction /// 04062 : Chemokine signaling pathway	GO:0016021 - integral component of membrane /// GO:0016020 - membrane /// GO:0005615 - extracellular space	GO:0005041 - low-density lipoprotein receptor activity /// GO:0005044 - scavenger receptor activity /// GO:0008009 - chemokine activity /// GO:0005125 - cytokine activity /// GO:0008009 - chemokine activity	GO:0006898 - receptor-mediated endocytosis /// GO:0006935 - chemotaxis /// GO:0048247 - lymphocyte chemotaxis /// GO:0030307 - positive regulation of cell growth /// GO:0030335 - positive regulation of cell migration /// GO:0034097 - response to cytokine /// GO:0034341 - response to interferon-gamma /// GO:0034612 - response to tumor necrosis factor /// GO:0060326 - cell chemotaxis	18301	19	18301	7.51368	0.15323	7.13577	7.76953	7.54126	0.846556	0.693326	2	8.6993	0.0180228	0.0191537	52.2092	8	0.0846556	1	0.818996	19.2347	0.00064065	3.19338	7.48219	0.320983	-1.07924	0.8952	0.184035	-0.633759	-0.405488	0.228271	-6.18094	-3.95465	2.40467	0.000187368	0.00356258	0.0404922
67016_at	Tbc1d2b	TBC1 domain family, member 2B	Mm.335347	ENSMUSG00000037410	NA	9	-90202049	67016	NM_194334 /// NP_919315 /// XR_379443	---	GO:0005575 - cellular_component	GO:0003674 - molecular_function /// GO:0005096 - GTPase activator activity /// GO:0005097 - Rab GTPase activator activity	GO:0008150 - biological_process /// GO:0032313 - regulation of Rab GTPase activity	19192	25	19192	5.89816	0.162388	5.5527	6.18018	5.87524	0.840638	0.67825	2	8.6993	0.0190755	0.0202985	49.2648	8	0.0840638	1	0.806828	17.778	0.000845381	3.07295	5.86937	0.313777	-1.00922	0.990516	0.0187051	-0.627471	-0.322539	0.304932	-5.94836	-3.05764	3.12233	0.000246823	0.0141697	0.0127882
59308_at	Emcn	endomucin	Mm.27343	ENSMUSG00000054690	NA	3	137341078	59308	NM_001163522 /// NM_016885 /// NP_001156994 /// NP_058581 /// XM_006501842 /// XP_006501905	---	GO:0016021 - integral component of membrane /// GO:0016020 - membrane /// GO:0016021 - integral component of membrane	---	---	17499	23	17499	8.73008	0.121388	8.2922	8.91846	8.87012	0.916991	0.795604	2	8.6993	0.0143625	0.0151735	65.9046	8	0.0916991	1	0.867624	27.6973	0.000168814	3.77259	8.69359	0.348455	-1.15192	0.645323	0.506597	-0.626258	-0.577918	0.0483398	-6.84195	-6.31383	0.570434	8.88045e-05	0.000160566	0.582814
207474_at	Kctd12b	potassium channel tetramerisation domain	Mm.271572	ENSMUSG00000041633	NA	X	-153685154	207474	NM_175429 /// NP_780638 /// XM_006528777 /// XM_006528778 /// XP_006528840 /// XP_006528841	---	GO:0043235 - receptor complex	GO:0003674 - molecular_function	GO:0008277 - regulation of G-protein coupled receptor protein signaling pathway /// GO:0006810 - transport /// GO:0006811 - ion transport	8117	24	8116	6.40195	0.147543	5.93963	6.54883	6.60181	1.03482	0.887281	2	8.6993	0.0173691	0.0184429	54.2214	8	0.103482	1	0.857422	25.5419	0.000228525	3.64107	6.36342	0.367969	-1.1517	0.503865	0.64784	-0.609197	-0.662176	-0.0529785	-6.05217	-6.57849	-0.568494	0.000218068	0.000118835	0.584074
53318_at	Pdlim3	PDZ and LIM domain 3	Mm.282900	ENSMUSG00000031636	NA	8	45885485	53318	NM_016798 /// NP_058078 /// XM_006509465 /// XP_006509528	---	GO:0030018 - Z disc /// GO:0015629 - actin cytoskeleton /// GO:0005737 - cytoplasm	GO:0008307 - structural constituent of muscle /// GO:0008307 - structural constituent of muscle /// GO:0008092 - cytoskeletal protein binding /// GO:0046872 - metal ion binding /// GO:0008270 - zinc ion binding	GO:0007015 - actin filament organization /// GO:0007507 - heart development	16334	19	16334	8.24475	0.0665723	7.98662	8.58887	8.09424	0.830741	0.764169	2	8.6993	0.00806137	0.00832154	120.17	8	0.0830741	1	0.919864	47.3969	2.10023e-05	4.67773	8.22324	0.321179	-0.736721	1.13838	-0.401661	-0.602243	-0.107614	0.494629	-8.78232	-1.5693	7.79094	1.301e-05	0.152186	3.31415e-05
20502_at	Slc16a2	solute carrier family 16 (monocarboxylic	Mm.388973	ENSMUSG00000033965	NA	X	-103697414	20502	NM_009197 /// NP_033223	---	GO:0016021 - integral component of membrane /// GO:0005886 - plasma membrane /// GO:0016020 - membrane	GO:0015349 - thyroid hormone transmembrane transporter activity /// GO:0015293 - symporter activity /// GO:0015349 - thyroid hormone transmembrane transporter activity	GO:0003333 - amino acid transmembrane transport /// GO:0034220 - ion transmembrane transport /// GO:0070327 - thyroid hormone transport /// GO:0006810 - transport /// GO:0055085 - transmembrane transport /// GO:0009914 - hormone transport /// GO:0070327 - thyroid hormone transport	7936	19	7936	6.40798	0.0849563	6.09357	6.68848	6.36328	0.704218	0.619262	2	8.6993	0.0101746	0.0106195	94.1661	8	0.0704218	1	0.879361	30.4316	0.000118233	3.92726	6.38178	0.297883	-0.967508	1.0296	-0.0620898	-0.594904	-0.269709	0.325195	-7.72199	-3.50088	4.55932	3.549e-05	0.00707679	0.00149256
13732_at	Emp3	epithelial membrane protein 3	Mm.20829	ENSMUSG00000040212	NA	7	-45918023; -45918023	13732	NM_001146346 /// NM_010129 /// NP_001139818 /// NP_034259	---	GO:0016021 - integral component of membrane /// GO:0016020 - membrane	---	GO:0016049 - cell growth	4700	26	4700	8.53998	0.115417	8.32499	8.91699	8.32422	1.00885	0.893429	2	8.6993	0.0136761	0.0144271	69.3142	8	0.100885	1	0.885595	32.6639	9.02057e-05	4.04477	8.52207	0.342016	-0.576225	1.1547	-0.578475	-0.592004	0.000769413	0.592773	-6.62804	0.0086143	7.16841	0.00011243	0.993321	6.25822e-05
16518_at	Kcnj2	potassium inwardly-rectifying channel, s	Mm.4951	ENSMUSG00000041695	NA	11	111066164	16518	NM_008425 /// NP_032451 /// XM_006532319 /// XP_006532382	04971 : Gastric acid secretion	GO:0016021 - integral component of membrane /// GO:0016020 - membrane /// GO:0005886 - plasma membrane /// GO:0005790 - smooth endoplasmic reticulum /// GO:0005791 - rough endoplasmic reticulum /// GO:0005794 - Golgi apparatus /// GO:0008076 - voltage-gated potassium channel complex /// GO:0014704 - intercalated disc /// GO:0030315 - T-tubule /// GO:0030425 - dendrite /// GO:0031224 - intrinsic c…	GO:0005515 - protein binding /// GO:0042802 - identical protein binding /// GO:0005244 - voltage-gated ion channel activity /// GO:0005242 - inward rectifier potassium channel activity /// GO:0005546 - phosphatidylinositol-4,5-bisphosphate binding /// GO:0086008 - voltage-gated potassium channel activity involved in cardiac muscle cell action potential repolarization	GO:0015693 - magnesium ion transport /// GO:0086001 - cardiac muscle cell action potential /// GO:0006810 - transport /// GO:0006811 - ion transport /// GO:0034765 - regulation of ion transmembrane transport /// GO:0006813 - potassium ion transport /// GO:0010107 - potassium ion import /// GO:0014861 - regulation of skeletal muscle contraction via regulation of action potential /// GO:0051289 - p…	5839	23	5839	6.21241	0.173728	5.61642	6.20752	6.66431	2.05629	1.88256	2	8.6993	0.0203791	0.021716	46.0489	8	0.205629	1	0.915514	46.1883	2.32762e-05	4.63309	6.16275	0.525377	-1.03988	0.0852178	0.954664	-0.591101	-1.04789	-0.456787	-5.42139	-9.61089	-4.52518	0.000473218	6.34719e-06	0.00156549
14013_at	Mecom	MDS1 and EVI1 complex locus	Mm.56965; Mm.426829	ENSMUSG00000027684	NA	3	-29951296; -30236569	14013	NM_007963 /// NM_021442 /// NP_031989 /// NP_067417 /// XM_006535387 /// XM_006535388 /// XM_006535389 /// XM_006535390 /// XM_006535391 /// XM_006535392 /// XM_006535393 /// XM_006535394 /// XM_006535395 /// XM_006535396 /// XM_006535397 /// XP_006535450 /// XP_006535451 /// XP_006535452 /// XP_006535453 /// XP_006535454 /// XP_006535455 /// XP_006535456 /// XP_006535457 /// XP_006535458 /// XP_…	04010 : MAPK signaling pathway /// 05200 : Pathways in cancer /// 05220 : Chronic myeloid leukemia	GO:0000118 - histone deacetylase complex /// GO:0005634 - nucleus /// GO:0016607 - nuclear speck	GO:0003677 - DNA binding /// GO:0003700 - sequence-specific DNA binding transcription factor activity	GO:0045944 - positive regulation of transcription from RNA polymerase II promoter /// GO:0001701 - in utero embryonic development /// GO:0001780 - neutrophil homeostasis /// GO:0006954 - inflammatory response /// GO:0009617 - response to bacterium /// GO:0009791 - post-embryonic development /// GO:0030900 - forebrain development /// GO:0035115 - embryonic forelimb morphogenesis /// GO:0035116 - e…	4783	43	4783	5.65987	0.0892747	5.23627	5.8252	5.81226	0.829804	0.740529	2	8.6993	0.0106711	0.0111593	89.611	8	0.0829804	1	0.892415	34.698	7.14777e-05	4.14583	5.62457	0.336344	-1.15449	0.596479	0.558008	-0.588926	-0.575987	0.0129395	-7.46447	-7.30047	0.177144	4.60235e-05	5.45024e-05	0.863451
331487_at	Uprt	uracil phosphoribosyltransferase (FUR1)	Mm.438275	ENSMUSG00000073016	2.4.2.9	X	104482782	331487	NM_001081189 /// NP_001074658	00240 : Pyrimidine metabolism /// 01100 : Metabolic pathways	GO:0005634 - nucleus /// GO:0005737 - cytoplasm	GO:0003674 - molecular_function	GO:0006222 - UMP biosynthetic process	14803	20	14803	7.44241	0.230858	7.26246	7.84985	7.16992	1.28905	1.05819	2	8.6993	0.0269463	0.0288572	34.6534	8	0.128905	1	0.820908	19.6351	0.000595409	3.22518	7.42741	0.36876	-0.447318	1.14558	-0.698258	-0.587395	0.0925367	0.679932	-4.68514	0.738085	5.85775	0.00125375	0.479899	0.000275321
56503_at	Ankrd49	ankyrin repeat domain 49	Mm.395005	ENSMUSG00000031931	NA	9	-14780198	56503	NM_019683 /// NP_062657 /// XM_006510503 /// XM_006510504 /// XM_006510505 /// XP_006510566 /// XP_006510567 /// XP_006510568	---	GO:0005575 - cellular_component	GO:0003674 - molecular_function	GO:0045893 - positive regulation of transcription, DNA-templated	17069	25	17069	6.46998	0.125588	6.33034	6.91138	6.1333	1.41682	1.29123	2	8.6993	0.0148454	0.0156985	63.7002	8	0.141682	1	0.911359	43.4893	2.95521e-05	4.52941	6.45834	0.404522	-0.316414	1.11993	-0.803516	-0.581032	0.197044	0.778076	-6.24376	2.11743	9.03112	0.000174133	0.064348	1.04281e-05
99633_at	Lphn2	latrophilin 2	Mm.9776; Mm.331434; Mm.462301	ENSMUSG00000028184	NA	3	-148815586	99633	NM_001081298 /// NP_001074767 /// XM_006502423 /// XM_006502424 /// XM_006502425 /// XM_006502426 /// XM_006502427 /// XM_006502428 /// XM_006502429 /// XM_006502430 /// XM_006502431 /// XM_006502432 /// XM_006502433 /// XM_006502434 /// XM_006502435 /// XM_006502436 /// XM_006502437 /// XM_006502438 /// XM_006502439 /// XM_006502440 /// XM_006502441 /// XM_006502442 /// XM_006502443 /// XM_00650…	---	GO:0005886 - plasma membrane /// GO:0016021 - integral component of membrane /// GO:0016020 - membrane /// GO:0043005 - neuron projection	GO:0004871 - signal transducer activity /// GO:0004888 - transmembrane signaling receptor activity /// GO:0004930 - G-protein coupled receptor activity /// GO:0030165 - PDZ domain binding	GO:0008150 - biological_process /// GO:0007165 - signal transduction /// GO:0007166 - cell surface receptor signaling pathway /// GO:0007186 - G-protein coupled receptor signaling pathway	24955	17	24955	6.83648	0.230849	6.31741	6.88916	7.1731	1.50348	1.27263	2	8.6993	0.0269453	0.0288561	34.6547	8	0.150348	1	0.846457	23.6152	0.000305349	3.5152	6.79322	0.435834	-1.09172	0.220124	0.8716	-0.571748	-0.855683	-0.283936	-4.56042	-6.82517	-2.44621	0.00149027	9.04455e-05	0.0378615
12051_at	Bcl3	B cell leukemia/lymphoma 3	Mm.439658	ENSMUSG00000053175	NA	7	-19808462	12051	NM_033601 /// NP_291079 /// XM_006539487 /// XP_006539550	---	GO:0005634 - nucleus /// GO:0005737 - cytoplasm /// GO:0032996 - Bcl3-Bcl10 complex /// GO:0033257 - Bcl3/NF-kappaB2 complex /// GO:0043234 - protein complex /// GO:0045171 - intercellular bridge	GO:0003677 - DNA binding /// GO:0003700 - sequence-specific DNA binding transcription factor activity /// GO:0005515 - protein binding /// GO:0008134 - transcription factor binding	GO:0045944 - positive regulation of transcription from RNA polymerase II promoter /// GO:0002268 - follicular dendritic cell differentiation /// GO:0002315 - marginal zone B cell differentiation /// GO:0002455 - humoral immune response mediated by circulating immunoglobulin /// GO:0002467 - germinal center formation /// GO:0042742 - defense response to bacterium /// GO:0043066 - negative regulati…	3828	15	3828	5.46125	0.128791	5.17173	5.73657	5.40308	0.697007	0.568217	2	8.6993	0.0152135	0.0160988	62.1163	8	0.0697007	1	0.815223	18.6748	0.000711226	3.14799	5.43713	0.283958	-0.934639	1.05455	-0.119909	-0.564845	-0.231349	0.333496	-5.99593	-2.45581	3.82377	0.000233162	0.037278	0.00433031
19731_at	Rgl1	ral guanine nucleotide dissociation stim	Mm.245270	ENSMUSG00000026482	NA	1	-152517530	19731	NM_016846 /// NP_058542 /// XM_006529264 /// XM_006529265 /// XM_006529266 /// XM_006529267 /// XM_006529268 /// XP_006529327 /// XP_006529328 /// XP_006529329 /// XP_006529330 /// XP_006529331	---	GO:0005622 - intracellular	GO:0005085 - guanyl-nucleotide exchange factor activity	GO:0007165 - signal transduction /// GO:0007264 - small GTPase mediated signal transduction /// GO:0051056 - regulation of small GTPase mediated signal transduction	7620	32	7620	6.38067	0.146974	5.95668	6.50659	6.57275	0.897296	0.750322	2	8.6993	0.0173036	0.0183717	54.4316	8	0.0897296	1	0.836204	21.6811	0.000417046	3.37982	6.34534	0.338215	-1.14916	0.476771	0.672393	-0.549916	-0.616078	-0.0661621	-5.47355	-6.13209	-0.711305	0.000442945	0.000198421	0.495524
17112_at	Tm4sf1	transmembrane 4 superfamily member 1	Mm.856	ENSMUSG00000027800	NA	3	-57287064	17112	NM_008536 /// NP_032562 /// XM_006501080 /// XP_006501143	---	GO:0016021 - integral component of membrane /// GO:0016020 - membrane /// GO:0005887 - integral component of plasma membrane	---	---	6217	19	6217	7.76742	0.0226165	7.43661	7.97461	7.80835	0.529329	0.506712	2	8.6993	0.00300858	0.00282707	353.723	8	0.0529329	1	0.957273	84.2112	2.02877e-06	5.69277	7.73986	0.275461	-1.10086	0.852217	0.248647	-0.537997	-0.371737	0.16626	-12.8422	-8.87354	4.28668	5.93899e-07	1.19893e-05	0.00219509
17260_at	Mef2c	myocyte enhancer factor 2C	Mm.24001; Mm.451574; Mm.487610	ENSMUSG00000005583	NA	13	83504034	17260	NM_001170537 /// NM_025282 /// NP_001164008 /// NP_079558 /// XM_006517120 /// XM_006517121 /// XM_006517122 /// XM_006517123 /// XM_006517124 /// XM_006517125 /// XM_006517126 /// XM_006517127 /// XM_006517128 /// XM_006517129 /// XM_006517130 /// XM_006517131 /// XM_006517132 /// XM_006517133 /// XP_006517183 /// XP_006517184 /// XP_006517185 /// XP_006517186 /// XP_006517187 /// XP_006517188 /…	04010 : MAPK signaling pathway	GO:0005634 - nucleus /// GO:0005622 - intracellular /// GO:0005634 - nucleus /// GO:0005829 - cytosol /// GO:0005634 - nucleus /// GO:0005737 - cytoplasm /// GO:0016607 - nuclear speck /// GO:0030017 - sarcomere /// GO:0043234 - protein complex	GO:0000977 - RNA polymerase II regulatory region sequence-specific DNA binding /// GO:0000978 - RNA polymerase II core promoter proximal region sequence-specific DNA binding /// GO:0000980 - RNA polymerase II distal enhancer sequence-specific DNA binding /// GO:0000981 - sequence-specific DNA binding RNA polymerase II transcription factor activity /// GO:0000987 - core promoter proximal region se…	GO:0000165 - MAPK cascade /// GO:0006355 - regulation of transcription, DNA-templated /// GO:0010628 - positive regulation of gene expression /// GO:0045893 - positive regulation of transcription, DNA-templated /// GO:0035690 - cellular response to drug /// GO:0035984 - cellular response to trichostatin A /// GO:0043524 - negative regulation of neuron apoptotic process /// GO:0045666 - positive r…	6430	23	6430	7.5227	0.0886334	7.15453	7.67456	7.64697	0.649294	0.560661	2	8.6993	0.0105973	0.0110792	90.2595	8	0.0649294	1	0.863493	26.4529	0.000200549	3.69778	7.49202	0.292599	-1.15342	0.623851	0.529566	-0.520027	-0.492439	0.0275879	-6.61408	-6.26319	0.378997	0.000114195	0.00017025	0.713775
18186_at	Nrp1	neuropilin 1	Mm.271745	ENSMUSG00000025810	NA	8	128359073	18186	NM_008737 /// NP_032763 /// XM_006530766 /// XM_006530767 /// XM_006530768 /// XP_006530829 /// XP_006530830 /// XP_006530831	04360 : Axon guidance	GO:0005886 - plasma membrane /// GO:0005769 - early endosome /// GO:0005883 - neurofilament /// GO:0030424 - axon /// GO:0097443 - sorting endosome /// GO:0016021 - integral component of membrane /// GO:0016020 - membrane /// GO:0005886 - plasma membrane /// GO:0005829 - cytosol /// GO:0005615 - extracellular space /// GO:0005925 - focal adhesion /// GO:0009986 - cell surface /// GO:0030424 - axo…	GO:0017154 - semaphorin receptor activity /// GO:0005021 - vascular endothelial growth factor-activated receptor activity /// GO:0005515 - protein binding /// GO:0019838 - growth factor binding /// GO:0017154 - semaphorin receptor activity /// GO:0038085 - vascular endothelial growth factor binding /// GO:0017154 - semaphorin receptor activity /// GO:0046872 - metal ion binding /// GO:0008201 - h…	GO:0007411 - axon guidance /// GO:0048841 - regulation of axon extension involved in axon guidance /// GO:0048843 - negative regulation of axon extension involved in axon guidance /// GO:0071526 - semaphorin-plexin signaling pathway /// GO:0001525 - angiogenesis /// GO:0001569 - patterning of blood vessels /// GO:0001764 - neuron migration /// GO:0002040 - sprouting angiogenesis /// GO:0002042 - …	6784	34	6784	8.80769	0.0981782	8.43288	8.94873	8.94775	0.677659	0.579481	2	8.6993	0.0116945	0.0122723	81.4844	8	0.0677659	1	0.855121	24.7757	0.000255849	3.59202	8.77646	0.297543	-1.1547	0.578991	0.575708	-0.515847	-0.51487	0.000976562	-6.24555	-6.23373	0.012771	0.000173771	0.000176177	0.990099
18049_at	Ngf	nerve growth factor	Mm.1259	ENSMUSG00000027859	NA	3	102469928	18049	NM_001112698 /// NM_013609 /// NP_001106168 /// NP_038637 /// XM_006501108 /// XM_006501109 /// XM_006501110 /// XP_006501171 /// XP_006501172 /// XP_006501173	04010 : MAPK signaling pathway /// 04210 : Apoptosis /// 04722 : Neurotrophin signaling pathway	GO:0005576 - extracellular region /// GO:0005615 - extracellular space	GO:0005057 - receptor signaling protein activity /// GO:0005102 - receptor binding /// GO:0008083 - growth factor activity /// GO:0005163 - nerve growth factor receptor binding	GO:0035556 - intracellular signal transduction /// GO:0010976 - positive regulation of neuron projection development /// GO:0014042 - positive regulation of neuron maturation /// GO:0045664 - regulation of neuron differentiation /// GO:0097192 - extrinsic apoptotic signaling pathway in absence of ligand /// GO:0007422 - peripheral nervous system development /// GO:0019233 - sensory perception of …	6708	20	6708	6.41865	0.0654561	6.1311	6.63965	6.41333	0.508992	0.443536	2	8.6993	0.00793306	0.00818201	122.219	8	0.0508992	1	0.871401	27.9549	0.000163036	3.78772	6.39469	0.254788	-1.03457	0.961415	0.0731531	-0.508552	-0.282234	0.226318	-7.47579	-4.14888	3.59347	4.54943e-05	0.00267862	0.0061386
12816_at	Col12a1	collagen, type XII, alpha 1	Mm.3819	ENSMUSG00000032332	NA	9	-79598991	12816	NM_001290308 /// NM_007730 /// NP_001277237 /// NP_031756 /// XM_006510797 /// XM_006510798 /// XM_006510799 /// XM_006510800 /// XP_006510860 /// XP_006510861 /// XP_006510862 /// XP_006510863	04974 : Protein digestion and absorption	GO:0005576 - extracellular region /// GO:0005581 - collagen trimer /// GO:0005578 - proteinaceous extracellular matrix /// GO:0005595 - collagen type XII trimer /// GO:0005615 - extracellular space /// GO:0031012 - extracellular matrix /// GO:0031982 - vesicle /// GO:0070062 - extracellular vesicular exosome	---	GO:0007155 - cell adhesion	4260	54	4260	3.35931	0.154432	3.20045	3.70825	3.12952	0.928406	0.773974	2	8.6993	0.018161	0.019304	51.8029	8	0.0928406	1	0.833659	21.3087	0.000444015	3.3526	3.34607	0.315656	-0.461341	1.14739	-0.686048	-0.507805	0.0709302	0.578735	-4.93366	0.689134	6.07331	0.000894523	0.5087	0.000212671
11789_at	Apc	adenomatosis polyposis coli	Mm.384171	ENSMUSG00000005871	NA	18	34220984	11789	NM_007462 /// NP_031488 /// XM_006525529 /// XM_006525530 /// XM_006525531 /// XM_006525532 /// XM_006525533 /// XM_006525534 /// XM_006525535 /// XM_006525536 /// XM_006525537 /// XM_006525538 /// XM_006525539 /// XP_006525592 /// XP_006525593 /// XP_006525594 /// XP_006525595 /// XP_006525596 /// XP_006525597 /// XP_006525598 /// XP_006525599 /// XP_006525600 /// XP_006525601 /// XP_006525602	04310 : Wnt signaling pathway /// 04810 : Regulation of actin cytoskeleton /// 05200 : Pathways in cancer /// 05210 : Colorectal cancer /// 05213 : Endometrial cancer /// 05217 : Basal cell carcinoma	GO:0005634 - nucleus /// GO:0005737 - cytoplasm /// GO:0005881 - cytoplasmic microtubule /// GO:0030424 - axon /// GO:0030426 - growth cone /// GO:0031253 - cell projection membrane /// GO:0034750 - Scrib-APC-beta-catenin complex /// GO:0035371 - microtubule plus-end /// GO:0042995 - cell projection /// GO:0044295 - axonal growth cone /// GO:0005623 - cell /// GO:0016020 - membrane /// GO:0005856…	GO:0008013 - beta-catenin binding /// GO:0051010 - microtubule plus-end binding /// GO:0005515 - protein binding /// GO:0002020 - protease binding /// GO:0008013 - beta-catenin binding /// GO:0008013 - beta-catenin binding /// GO:0008017 - microtubule binding /// GO:0019887 - protein kinase regulator activity /// GO:0019901 - protein kinase binding /// GO:0032403 - protein complex binding /// GO:…	GO:0016055 - Wnt signaling pathway /// GO:0051276 - chromosome organization /// GO:0000281 - mitotic cytokinesis /// GO:0001822 - kidney development /// GO:0001942 - hair follicle development /// GO:0051726 - regulation of cell cycle /// GO:0016055 - Wnt signaling pathway /// GO:0007026 - negative regulation of microtubule depolymerization /// GO:0007091 - metaphase/anaphase transition of mitotic…	3657	34	3657	6.62381	0.0922922	6.39569	6.89893	6.51978	0.594462	0.50217	2	8.6993	0.0110179	0.0115365	86.6812	8	0.0594462	1	0.844747	22.7888	0.000347905	3.45854	6.6048	0.262172	-0.797607	1.1219	-0.324292	-0.50324	-0.12409	0.37915	-6.27722	-1.54785	5.1083	0.000167505	0.157224	0.000709386
18710_at	Pik3r3	phosphatidylinositol 3 kinase, regulator	Mm.253819	ENSMUSG00000028698	NA	4	116221914	18710	NM_181585 /// NP_853616 /// XM_006502859 /// XM_006502860 /// XM_006502861 /// XP_006502922 /// XP_006502923 /// XP_006502924	04012 : ErbB signaling pathway /// 04062 : Chemokine signaling pathway /// 04070 : Phosphatidylinositol signaling system /// 04150 : mTOR signaling pathway /// 04210 : Apoptosis /// 04370 : VEGF signaling pathway /// 04380 : Osteoclast differentiation /// 04510 : Focal adhesion /// 04620 : Toll-like receptor signaling pathway /// 04630 : Jak-STAT signaling pathway /// 04650 : Natural killer cell …	GO:0005942 - phosphatidylinositol 3-kinase complex	GO:0046935 - 1-phosphatidylinositol-3-kinase regulator activity /// GO:0005515 - protein binding /// GO:0046935 - 1-phosphatidylinositol-3-kinase regulator activity	GO:0008286 - insulin receptor signaling pathway /// GO:0043551 - regulation of phosphatidylinositol 3-kinase activity /// GO:0043551 - regulation of phosphatidylinositol 3-kinase activity	7057	19	7057	5.79135	0.117405	5.42279	5.91748	5.94165	0.678906	0.561501	2	8.6993	0.0139047	0.0146756	68.1402	8	0.0678906	1	0.827067	20.1911	0.000538928	3.26847	5.76064	0.292835	-1.15372	0.53559	0.618127	-0.494688	-0.518858	-0.0241699	-5.49278	-5.76115	-0.289874	0.000432319	0.000309704	0.778703
67979_at	Atad1	ATPase family, AAA domain containing 1	Mm.27123	ENSMUSG00000013662	NA	19	-32672563	67979	NM_026487 /// NP_080763 /// XM_006527312 /// XM_006527313 /// XP_006527375 /// XP_006527376	---	GO:0005739 - mitochondrion /// GO:0045211 - postsynaptic membrane /// GO:0005886 - plasma membrane /// GO:0005777 - peroxisome /// GO:0030054 - cell junction /// GO:0045202 - synapse /// GO:0016020 - membrane /// GO:0005778 - peroxisomal membrane	GO:0016887 - ATPase activity /// GO:0005515 - protein binding /// GO:0000166 - nucleotide binding /// GO:0005524 - ATP binding /// GO:0016787 - hydrolase activity	GO:0006200 - ATP catabolic process /// GO:0002092 - positive regulation of receptor internalization /// GO:0007612 - learning /// GO:0007613 - memory /// GO:0051967 - negative regulation of synaptic transmission, glutamatergic	19886	22	19886	8.90567	0.197424	8.79735	9.29102	8.60156	1.19651	0.999091	2	8.6993	0.023103	0.024678	40.522	8	0.119651	1	0.835001	21.6226	0.000421147	3.37557	8.89664	0.35529	-0.279472	1.11	-0.830532	-0.493667	0.195786	0.689453	-4.25248	1.68651	6.41484	0.0023057	0.12714	0.000142998
19419_at	Rasgrp1	RAS guanyl releasing protein 1	Mm.42150	ENSMUSG00000027347	NA	2	-117279993	19419	NM_011246 /// NP_035376	04010 : MAPK signaling pathway /// 04660 : T cell receptor signaling pathway	GO:0005622 - intracellular /// GO:0005623 - cell /// GO:0042629 - mast cell granule /// GO:0005886 - plasma membrane /// GO:0016020 - membrane /// GO:0005783 - endoplasmic reticulum /// GO:0005737 - cytoplasm /// GO:0005794 - Golgi apparatus	GO:0005509 - calcium ion binding /// GO:0005085 - guanyl-nucleotide exchange factor activity /// GO:0046872 - metal ion binding	GO:0001816 - cytokine production /// GO:0002437 - inflammatory response to antigenic stimulus /// GO:0014066 - regulation of phosphatidylinositol 3-kinase signaling /// GO:0032252 - secretory granule localization /// GO:0032856 - activation of Ras GTPase activity /// GO:0032862 - activation of Rho GTPase activity /// GO:0043303 - mast cell degranulation /// GO:0047496 - vesicle transport along mi…	7519	27	7519	3.37232	0.0926662	3.24148	3.71887	3.1239	0.871266	0.7786	2	8.6993	0.0110609	0.0115833	86.3313	8	0.0871266	1	0.893642	35.196	6.76445e-05	4.16977	3.36142	0.315098	-0.380642	1.13443	-0.753783	-0.477395	0.117576	0.594971	-5.94325	1.46374	8.00046	0.000248343	0.17844	2.6994e-05
14127_at	Fcer1g	Fc receptor, IgE, high affinity I, gamma	Mm.22673	ENSMUSG00000058715	NA	1	-171229572	14127	NM_010185 /// NP_034315 /// XM_006496656 /// XP_006496719	04650 : Natural killer cell mediated cytotoxicity /// 04664 : Fc epsilon RI signaling pathway /// 05310 : Asthma	GO:0045121 - membrane raft /// GO:0005887 - integral component of plasma membrane /// GO:0009897 - external side of plasma membrane /// GO:0032998 - Fc-epsilon receptor I complex /// GO:0005886 - plasma membrane /// GO:0016021 - integral component of membrane /// GO:0016020 - membrane /// GO:0009986 - cell surface	GO:0019767 - IgE receptor activity /// GO:0019863 - IgE binding /// GO:0019767 - IgE receptor activity /// GO:0019863 - IgE binding /// GO:0019864 - IgG binding /// GO:0005515 - protein binding /// GO:0004888 - transmembrane signaling receptor activity	GO:0007165 - signal transduction /// GO:0007166 - cell surface receptor signaling pathway /// GO:0032755 - positive regulation of interleukin-6 production /// GO:0032760 - positive regulation of tumor necrosis factor production /// GO:0032765 - positive regulation of mast cell cytokine production /// GO:0033026 - negative regulation of mast cell apoptotic process /// GO:0043306 - positive regulat…	4895	28	4895	8.29549	0.247605	8.21532	8.69141	7.95972	1.34486	1.09726	2	8.6993	0.0288714	0.0309506	32.3095	8	0.134486	1	0.815888	19.0025	0.000668823	3.17469	8.28881	0.37134	-0.197921	1.08416	-0.88624	-0.476089	0.2556	0.731689	-3.66856	1.96956	6.08987	0.00547425	0.0815052	0.000208547
69256_at	Zfp397	zinc finger protein 397	Mm.218343	ENSMUSG00000024276	NA	18	23954688	69256	NM_027007 /// NP_081283 /// XM_006526223 /// XP_006526286	---	GO:0005575 - cellular_component /// GO:0005634 - nucleus	GO:0003674 - molecular_function /// GO:0046872 - metal ion binding	GO:0008150 - biological_process /// GO:0006351 - transcription, DNA-templated /// GO:0006355 - regulation of transcription, DNA-templated	20500	25	20500	5.81514	0.0494223	5.53897	6.00195	5.83545	0.419472	0.37005	2	8.6993	0.00608995	0.00617779	161.87	8	0.0419472	1	0.88218	30.382	0.00011897	3.92456	5.79213	0.234511	-1.07949	0.894748	0.184742	-0.462979	-0.296475	0.166504	-7.76777	-4.9742	3.0174	3.39111e-05	0.00084731	0.0151061
76338_at	Rab2b	RAB2B, member RAS oncogene family	Mm.32870	ENSMUSG00000022159	NA	14	-52261759	76338	NM_172601 /// NP_766189	---	GO:0005886 - plasma membrane /// GO:0016020 - membrane /// GO:0005783 - endoplasmic reticulum /// GO:0005794 - Golgi apparatus /// GO:0070062 - extracellular vesicular exosome	GO:0000166 - nucleotide binding /// GO:0005525 - GTP binding	GO:0016192 - vesicle-mediated transport /// GO:0006810 - transport /// GO:0007264 - small GTPase mediated signal transduction /// GO:0015031 - protein transport /// GO:0045921 - positive regulation of exocytosis	23612	17	23612	5.16938	0.380102	5.17575	5.63843	4.69556	2.15828	1.77818	2	8.6993	0.0441022	0.0475127	21.047	8	0.215828	1	0.823887	20.1598	0.000541926	3.26606	5.16991	0.471463	0.0123862	0.993749	-1.00614	-0.462676	0.480195	0.942871	-2.88462	2.99385	6.34947	0.0186745	0.0156836	0.000154111
74045_at	Slc36a1os	solute carrier family 36 (proton/amino a	Mm.292156	ENSMUSG00000084980	NA	11	-55191719	74045	NR_046034	---	-----	-----	-----	22621	17	22621	2.33828	0.075727	2.13767	2.6001	2.22693	0.520256	0.444529	2	8.6993	0.00911372	0.00946587	105.643	8	0.0520256	1	0.854443	24.3879	0.000271212	3.56669	2.32156	0.245311	-0.749652	1.13543	-0.385776	-0.462432	-0.089263	0.373169	-6.34222	-1.22424	5.52806	0.0001554	0.252982	0.000413542
14595_at	B4galt1	UDP-Gal:betaGlcNAc beta 1,4- galactosylt	Mm.15622	ENSMUSG00000028413	2.4.1.- /// 2.4.1.38 /// 2.4.1.90 /// 2.4.1.22	4	-40804582	14595	NM_022305 /// NP_071641 /// XM_006537620 /// XP_006537683	00052 : Galactose metabolism /// 00510 : N-Glycan biosynthesis /// 00514 : Other types of O-glycan biosynthesis /// 00533 : Glycosaminoglycan biosynthesis - keratan sulfate /// 00601 : Glycosphingolipid biosynthesis - lacto and neolacto series /// 01100 : Metabolic pathways	GO:0005886 - plasma membrane /// GO:0005794 - Golgi apparatus /// GO:0009986 - cell surface /// GO:0009986 - cell surface /// GO:0016021 - integral component of membrane /// GO:0005576 - extracellular region /// GO:0000138 - Golgi trans cisterna /// GO:0016020 - membrane /// GO:0005615 - extracellular space /// GO:0005794 - Golgi apparatus /// GO:0009897 - external side of plasma membrane /// GO:…	GO:0003831 - beta-N-acetylglucosaminylglycopeptide beta-1,4-galactosyltransferase activity /// GO:0008092 - cytoskeletal protein binding /// GO:0008378 - galactosyltransferase activity /// GO:0003831 - beta-N-acetylglucosaminylglycopeptide beta-1,4-galactosyltransferase activity /// GO:0005515 - protein binding /// GO:0000009 - alpha-1,6-mannosyltransferase activity /// GO:0000026 - alpha-1,2-man…	GO:0006012 - galactose metabolic process /// GO:0009312 - oligosaccharide biosynthetic process /// GO:0051270 - regulation of cellular component movement /// GO:0002064 - epithelial cell development /// GO:0002526 - acute inflammatory response /// GO:0005989 - lactose biosynthetic process /// GO:0006486 - protein glycosylation /// GO:0007339 - binding of sperm to zona pellucida /// GO:0007341 - p…	5148	22	5148	8.42596	0.0535676	8.29427	8.75439	8.19629	0.748066	0.694498	2	8.6993	0.00656646	0.00669595	149.344	8	0.0748066	1	0.928392	52.8823	1.35501e-05	4.86806	8.41498	0.297992	-0.405091	1.13899	-0.733898	-0.460124	0.0979818	0.558105	-7.43448	1.58315	9.74015	4.74587e-05	0.149011	5.70169e-06
66500_at	Slc30a7	solute carrier family 30 (zinc transport	Mm.34550	ENSMUSG00000054414	NA	3	-115938973	66500	NM_023214 /// NP_075703	---	GO:0005737 - cytoplasm /// GO:0005794 - Golgi apparatus /// GO:0016023 - cytoplasmic membrane-bounded vesicle /// GO:0048471 - perinuclear region of cytoplasm /// GO:0016021 - integral component of membrane /// GO:0016020 - membrane /// GO:0005737 - cytoplasm /// GO:0005794 - Golgi apparatus /// GO:0031982 - vesicle /// GO:0070062 - extracellular vesicular exosome	GO:0008270 - zinc ion binding /// GO:0008324 - cation transmembrane transporter activity	GO:0006829 - zinc ion transport /// GO:0006810 - transport /// GO:0006811 - ion transport /// GO:0006812 - cation transport /// GO:0055085 - transmembrane transport	18605	21	18607	5.90542	0.04694	5.58321	6.03833	6.01416	0.476346	0.429406	2	8.6993	0.00580461	0.00586751	170.43	8	0.0476346	1	0.901458	36.9884	5.57823e-05	4.2535	5.87857	0.256069	-1.15341	0.623901	0.529513	-0.455115	-0.430945	0.0241699	-7.82125	-7.40589	0.448646	3.21638e-05	4.88731e-05	0.664653
230709_at	Zmpste24	zinc metallopeptidase, STE24	Mm.34399	ENSMUSG00000043207	NA	4	-121059238	230709	NM_172700 /// NP_766288 /// XM_006503019 /// XP_006503082	---	GO:0016020 - membrane /// GO:0016021 - integral component of membrane /// GO:0005783 - endoplasmic reticulum /// GO:0005634 - nucleus /// GO:0016020 - membrane /// GO:0070062 - extracellular vesicular exosome	GO:0004222 - metalloendopeptidase activity /// GO:0004222 - metalloendopeptidase activity /// GO:0008237 - metallopeptidase activity /// GO:0008233 - peptidase activity /// GO:0046872 - metal ion binding /// GO:0016787 - hydrolase activity	GO:0030327 - prenylated protein catabolic process /// GO:0006508 - proteolysis /// GO:0006998 - nuclear envelope organization /// GO:0006998 - nuclear envelope organization /// GO:0071586 - CAAX-box protein processing	10497	17	10497	7.05091	0.0658837	6.84162	7.29224	6.96655	0.45871	0.392826	2	8.6993	0.00798222	0.00823546	121.426	8	0.045871	1	0.856372	24.6063	0.000262424	3.581	7.03347	0.232642	-0.824658	1.1123	-0.287638	-0.450617	-0.124933	0.325684	-6.6037	-1.83087	5.15524	0.000115527	0.101502	0.000667019
67993_at	Nudt12	nudix (nucleoside diphosphate linked moi	Mm.36507	ENSMUSG00000024228	3.6.1.22	17	-59001401	67993	NM_026497 /// NP_080773 /// XM_006524834 /// XM_006524835 /// XP_006524897 /// XP_006524898	00760 : Nicotinate and nicotinamide metabolism /// 04146 : Peroxisome	GO:0005777 - peroxisome /// GO:0005634 - nucleus /// GO:0005737 - cytoplasm	GO:0046872 - metal ion binding /// GO:0016787 - hydrolase activity /// GO:0000210 - NAD+ diphosphatase activity /// GO:0035529 - NADH pyrophosphatase activity	GO:0006742 - NADP catabolic process /// GO:0019677 - NAD catabolic process	19893	26	19893	6.86416	0.0973799	6.71481	7.16284	6.67749	0.660518	0.563138	2	8.6993	0.0116028	0.0121725	82.1525	8	0.0660518	1	0.85257	24.2674	0.000276212	3.55876	6.85172	0.270089	-0.506875	1.15194	-0.645066	-0.448028	0.0373239	0.485352	-5.44585	0.453678	6.37222	0.00045875	0.661165	0.00015014
114716_at	Spred2	sprouty-related, EVH1 domain containing	Mm.266627	ENSMUSG00000045671	NA	11	19924442	114716	NM_033523 /// NP_277058 /// XM_006514456 /// XM_006514457 /// XM_006514458 /// XP_006514519 /// XP_006514520 /// XP_006514521	04630 : Jak-STAT signaling pathway	GO:0005886 - plasma membrane /// GO:0031410 - cytoplasmic vesicle /// GO:0016020 - membrane /// GO:0005634 - nucleus /// GO:0005737 - cytoplasm	GO:0030291 - protein serine/threonine kinase inhibitor activity /// GO:0005515 - protein binding /// GO:0005173 - stem cell factor receptor binding /// GO:0019901 - protein kinase binding /// GO:0019901 - protein kinase binding	GO:0010801 - negative regulation of peptidyl-threonine phosphorylation /// GO:0043517 - positive regulation of DNA damage response, signal transduction by p53 class mediator /// GO:0071901 - negative regulation of protein serine/threonine kinase activity /// GO:0090311 - regulation of protein deacetylation /// GO:0000188 - inactivation of MAPK activity /// GO:0007275 - multicellular organismal de…	3416	15	3415	7.84412	0.0736208	7.61887	8.05078	7.8064	0.402355	0.328735	2	8.6993	0.00887161	0.0092026	108.665	8	0.0402355	1	0.817025	18.5273	0.000731381	3.13586	7.82535	0.216576	-0.953365	1.04088	-0.0875173	-0.431907	-0.187522	0.244385	-6.00386	-2.60671	3.66934	0.000230967	0.0292085	0.00546779
20501_at	Slc16a1	solute carrier family 16 (monocarboxylic	Mm.9086	ENSMUSG00000032902	NA	3	104638668	20501	NM_009196 /// NP_033222	---	GO:0005739 - mitochondrion /// GO:0005887 - integral component of plasma membrane /// GO:0016021 - integral component of membrane /// GO:0005886 - plasma membrane /// GO:0016020 - membrane /// GO:0005887 - integral component of plasma membrane /// GO:0005813 - centrosome /// GO:0070062 - extracellular vesicular exosome	GO:0015129 - lactate transmembrane transporter activity /// GO:0015293 - symporter activity /// GO:0015355 - secondary active monocarboxylate transmembrane transporter activity /// GO:0042803 - protein homodimerization activity /// GO:0097159 - organic cyclic compound binding	GO:0006629 - lipid metabolic process /// GO:0050796 - regulation of insulin secretion /// GO:0032094 - response to food /// GO:0042593 - glucose homeostasis /// GO:0051780 - behavioral response to nutrient /// GO:0035879 - plasma membrane lactate transport /// GO:0006810 - transport /// GO:0015711 - organic anion transport /// GO:0055085 - transmembrane transport /// GO:0035873 - lactate transmem…	7935	25	7935	9.46993	0.0656745	9.18857	9.60986	9.54102	0.401711	0.336036	2	8.6993	0.00795817	0.00820931	121.813	8	0.0401711	1	0.836513	21.1127	0.000459081	3.33811	9.44648	0.225999	-1.14123	0.722932	0.418295	-0.421298	-0.35245	0.0688477	-6.18336	-5.17289	1.09143	0.00018684	0.00065181	0.304386
11931_at	Atp1b1	ATPase, Na+/K+ transporting, beta 1 poly	Mm.4550	ENSMUSG00000026576	NA	1	-164437267	11931	NM_009721 /// NP_033851	04260 : Cardiac muscle contraction /// 04960 : Aldosterone-regulated sodium reabsorption /// 04964 : Proximal tubule bicarbonate reclamation /// 04970 : Salivary secretion /// 04971 : Gastric acid secretion /// 04972 : Pancreatic secretion /// 04973 : Carbohydrate digestion and absorption /// 04974 : Protein digestion and absorption /// 04976 : Bile secretion	GO:0005886 - plasma membrane /// GO:0016323 - basolateral plasma membrane /// GO:0016324 - apical plasma membrane /// GO:0014704 - intercalated disc /// GO:0042383 - sarcolemma /// GO:0016021 - integral component of membrane /// GO:0016020 - membrane /// GO:0005886 - plasma membrane /// GO:0005890 - sodium:potassium-exchanging ATPase complex /// GO:0005901 - caveola /// GO:0016323 - basolateral p…	GO:0005391 - sodium:potassium-exchanging ATPase activity /// GO:0005515 - protein binding /// GO:0001671 - ATPase activator activity /// GO:0005391 - sodium:potassium-exchanging ATPase activity /// GO:0023026 - MHC class II protein complex binding /// GO:0051117 - ATPase binding	GO:0001824 - blastocyst development /// GO:0006874 - cellular calcium ion homeostasis /// GO:0010468 - regulation of gene expression /// GO:0010882 - regulation of cardiac muscle contraction by calcium ion signaling /// GO:0050821 - protein stabilization /// GO:0055119 - relaxation of cardiac muscle /// GO:0060048 - cardiac muscle contraction /// GO:1903169 - regulation of calcium ion transmembra…	3755	25	3755	9.7978	0.0407335	9.51574	9.93213	9.875	0.375418	0.334684	2	8.6993	0.00509116	0.00509169	196.399	8	0.0375418	1	0.891498	32.8692	8.80614e-05	4.05521	9.77429	0.225723	-1.14542	0.699255	0.446162	-0.416386	-0.359257	0.0571289	-7.64063	-6.59232	1.1323	3.84992e-05	0.000117008	0.287751
239743_at	Klhl6	kelch-like 6	Mm.86699	ENSMUSG00000043008	NA	16	-19946492	239743	NM_183390 /// NP_899246	---	GO:0005575 - cellular_component	GO:0003674 - molecular_function	GO:0002467 - germinal center formation /// GO:0050853 - B cell receptor signaling pathway	11445	25	11445	5.5484	0.0537576	5.29791	5.70923	5.57544	0.34838	0.294622	2	8.6993	0.00658831	0.00671971	148.816	8	0.034838	1	0.845693	22.3595	0.00037289	3.42842	5.52753	0.209803	-1.09443	0.866061	0.228372	-0.411318	-0.277529	0.133789	-6.63487	-4.47675	2.33103	0.000111577	0.0016756	0.0456104
17227_at	Mcpt4	mast cell protease 4	Mm.439684	ENSMUSG00000061068	NA	14	-56059744	17227	NM_010779 /// NP_034909	---	GO:0005622 - intracellular /// GO:0030141 - secretory granule	GO:0004252 - serine-type endopeptidase activity /// GO:0008233 - peptidase activity /// GO:0003824 - catalytic activity /// GO:0008236 - serine-type peptidase activity /// GO:0016787 - hydrolase activity	GO:0006508 - proteolysis /// GO:0002002 - regulation of angiotensin levels in blood	6411	11	6411	2.67619	0.530416	2.76256	3.16125	2.12634	2.70328	2.17286	2	8.6993	0.061381	0.066302	15.0825	8	0.270328	1	0.803788	17.6998	0.00085851	3.06625	2.68339	0.521979	0.151683	0.915493	-1.06718	-0.398693	0.636219	1.03491	-2.10699	3.36226	5.90747	0.0654346	0.00877287	0.000259265
12807_at	Hps3	Hermansky-Pudlak syndrome 3 homolog (hum	Mm.291533	ENSMUSG00000027615	NA	3	-19995945; -20015221	12807	NM_001146323 /// NM_001146324 /// NM_080634 /// NP_001139795 /// NP_001139796 /// NP_542365 /// XM_006535377 /// XM_006535378 /// XM_006535379 /// XM_006535380 /// XP_006535440 /// XP_006535441 /// XP_006535442 /// XP_006535443 /// XR_389587	---	GO:0005737 - cytoplasm /// GO:0031084 - BLOC-2 complex	---	GO:0006996 - organelle organization /// GO:0043473 - pigmentation	4253	30	4253	5.98572	0.0659242	5.71588	6.11426	6.05957	0.372269	0.306345	2	8.6993	0.00798688	0.00824053	121.351	8	0.0372269	1	0.822913	19.178	0.000647387	3.18884	5.96324	0.215955	-1.14541	0.699321	0.446086	-0.398378	-0.343691	0.0546875	-5.83645	-5.03525	0.865395	0.000282528	0.000781227	0.410052
15212_at	Hexb	hexosaminidase B	Mm.27816	ENSMUSG00000021665	3.2.1.52	13	-97176331	15212	NM_010422 /// NP_034552	00511 : Other glycan degradation /// 00520 : Amino sugar and nucleotide sugar metabolism /// 00531 : Glycosaminoglycan degradation /// 00603 : Glycosphingolipid biosynthesis - globo series /// 00604 : Glycosphingolipid biosynthesis - ganglio series /// 01100 : Metabolic pathways /// 04142 : Lysosome	GO:0001669 - acrosomal vesicle /// GO:0016020 - membrane /// GO:0005764 - lysosome /// GO:0005623 - cell /// GO:0016020 - membrane /// GO:0005764 - lysosome /// GO:0070062 - extracellular vesicular exosome	GO:0004563 - beta-N-acetylhexosaminidase activity /// GO:0042803 - protein homodimerization activity /// GO:0004563 - beta-N-acetylhexosaminidase activity /// GO:0004563 - beta-N-acetylhexosaminidase activity /// GO:0004553 - hydrolase activity, hydrolyzing O-glycosyl compounds /// GO:0016787 - hydrolase activity /// GO:0016798 - hydrolase activity, acting on glycosyl bonds /// GO:0030246 - carbo…	GO:0006687 - glycosphingolipid metabolic process /// GO:0006689 - ganglioside catabolic process /// GO:0006874 - cellular calcium ion homeostasis /// GO:0007040 - lysosome organization /// GO:0007338 - single fertilization /// GO:0007341 - penetration of zona pellucida /// GO:0007626 - locomotory behavior /// GO:0008049 - male courtship behavior /// GO:0008360 - regulation of cell shape /// GO:00…	5438	27	5438	7.31512	0.0552145	7.15252	7.54419	7.20801	0.390313	0.335098	2	8.6993	0.00675577	0.00690181	144.89	8	0.0390313	1	0.858538	24.8009	0.00025489	3.59365	7.30157	0.211936	-0.703286	1.14476	-0.441478	-0.391668	-0.0554865	0.336182	-6.23911	-0.883876	5.78431	0.000175079	0.40053	0.000301056
27361_at	Msrb1	methionine sulfoxide reductase B1	Mm.28212	ENSMUSG00000075705	NA	17	24736642	27361	NM_013759 /// NP_038787	---	GO:0005634 - nucleus /// GO:0005737 - cytoplasm /// GO:0015629 - actin cytoskeleton /// GO:0005856 - cytoskeleton	GO:0003779 - actin binding /// GO:0008270 - zinc ion binding /// GO:0033743 - peptide-methionine (R)-S-oxide reductase activity /// GO:0070191 - methionine-R-sulfoxide reductase activity /// GO:0046872 - metal ion binding /// GO:0016491 - oxidoreductase activity /// GO:0008113 - peptide-methionine (S)-S-oxide reductase activity /// GO:0016671 - oxidoreductase activity, acting on a sulfur group of…	GO:0055114 - oxidation-reduction process /// GO:0030041 - actin filament polymerization /// GO:0030091 - protein repair /// GO:0045087 - innate immune response /// GO:0002376 - immune system process /// GO:0006979 - response to oxidative stress	13636	16	13636	9.71523	0.0583536	9.52876	9.9165	9.65381	0.339797	0.281444	2	8.6993	0.00711661	0.0072942	137.095	8	0.0339797	1	0.828269	19.7737	0.000580675	3.23607	9.69969	0.1979	-0.863708	1.09556	-0.231852	-0.38774	-0.125044	0.262695	-6.0179	-1.94075	4.40383	0.000227133	0.0853243	0.00185735
228005_at	Ppig	peptidyl-prolyl isomerase G (cyclophilin	Mm.11815; Mm.474951; Mm.488936	ENSMUSG00000042133	NA	2	69723088	228005	NM_001081086 /// NP_001074555 /// XM_006499184 /// XM_006499185 /// XM_006499186 /// XM_006499187 /// XP_006499247 /// XP_006499248 /// XP_006499249 /// XP_006499250	---	GO:0005634 - nucleus /// GO:0005737 - cytoplasm /// GO:0016363 - nuclear matrix	GO:0016853 - isomerase activity /// GO:0003755 - peptidyl-prolyl cis-trans isomerase activity /// GO:0044822 - poly(A) RNA binding	GO:0006457 - protein folding /// GO:0000413 - protein peptidyl-prolyl isomerization	10253	13	10253	6.79585	0.0615119	6.57795	6.96143	6.7937	0.313636	0.252124	2	8.6993	0.00747968	0.00768899	130.056	8	0.0313636	1	0.803875	16.854	0.00101773	2.99237	6.77769	0.19224	-1.03904	0.955756	0.0832799	-0.383478	-0.215754	0.167725	-5.80552	-3.26632	2.74265	0.000293364	0.0101924	0.0234577
66244_at	Nemf	nuclear export mediator factor	Mm.46705	ENSMUSG00000020982	NA	12	-69311543	66244	NM_025441 /// NM_181665 /// NP_079717 /// XM_006516140 /// XM_006516141 /// XP_006516203 /// XP_006516204	---	GO:0005634 - nucleus /// GO:0005622 - intracellular /// GO:0005623 - cell	GO:0003674 - molecular_function	GO:0051168 - nuclear export	18406	28	18406	6.23408	0.0820407	6.11219	6.4939	6.06567	0.510076	0.428035	2	8.6993	0.0098395	0.0102551	97.5125	8	0.0510076	1	0.83916	21.7509	0.000412216	3.38487	6.22392	0.234961	-0.475536	1.14903	-0.673494	-0.38171	0.0465125	0.428223	-5.03836	0.613938	6.10518	0.000778017	0.554968	0.000204812
258743_at	Olfr661	olfactory receptor 661	Mm.223175	ENSMUSG00000073920	NA	7	104688017	258743	NM_146748 /// NP_666959	04740 : Olfactory transduction	GO:0005886 - plasma membrane /// GO:0016020 - membrane /// GO:0016021 - integral component of membrane	GO:0004871 - signal transducer activity /// GO:0004930 - G-protein coupled receptor activity /// GO:0004984 - olfactory receptor activity	GO:0007165 - signal transduction /// GO:0050896 - response to stimulus /// GO:0007186 - G-protein coupled receptor signaling pathway /// GO:0007608 - sensory perception of smell /// GO:0050911 - detection of chemical stimulus involved in sensory perception of smell	12745	10	12745	3.8053	0.0471598	3.70585	4.0874	3.59778	0.56742	0.52026	2	8.6993	0.00582987	0.00589498	169.636	8	0.056742	1	0.916887	44.6202	2.66964e-05	4.57355	3.79701	0.257227	-0.354402	1.12894	-0.774534	-0.381555	0.108069	0.489624	-6.54288	1.85317	9.06877	0.000123685	0.0980028	1.00893e-05
259008_at	Olfr392	olfactory receptor 392	Mm.223395	ENSMUSG00000061984	NA	11	-73814142	259008	NM_147006 /// NP_667217 /// XM_006533363 /// XM_006536297 /// XP_006533426 /// XP_006536360	04740 : Olfactory transduction	GO:0005886 - plasma membrane /// GO:0016020 - membrane /// GO:0016021 - integral component of membrane	GO:0004871 - signal transducer activity /// GO:0004930 - G-protein coupled receptor activity /// GO:0004984 - olfactory receptor activity	GO:0007165 - signal transduction /// GO:0050896 - response to stimulus /// GO:0007186 - G-protein coupled receptor signaling pathway /// GO:0007608 - sensory perception of smell /// GO:0050911 - detection of chemical stimulus involved in sensory perception of smell	12970	12	12970	2.38594	0.0901766	2.30657	2.68738	2.14404	0.706593	0.616416	2	8.6993	0.0107747	0.0112721	88.7148	8	0.0706593	1	0.872378	28.6047	0.000149507	3.82534	2.37933	0.27888	-0.26091	1.10459	-0.843683	-0.380811	0.162524	0.543335	-4.80339	2.05001	7.40252	0.00106649	0.0716887	4.90428e-05
71207_at	Nudt4	nudix (nucleoside diphosphate linked moi	Mm.24397	ENSMUSG00000020029	NA	10	-95547007	71207	NM_027722 /// NP_081998 /// XM_006514116 /// XP_006514179	---	GO:0005575 - cellular_component /// GO:0005737 - cytoplasm	GO:0030515 - snoRNA binding /// GO:0003723 - RNA binding /// GO:0004787 - thiamine-pyrophosphatase activity /// GO:0046872 - metal ion binding /// GO:0008413 - 8-oxo-7,8-dihydroguanosine triphosphate pyrophosphatase activity /// GO:0008758 - UDP-2,3-diacylglucosamine hydrolase activity /// GO:0008796 - bis(5'-nucleosyl)-tetraphosphatase activity /// GO:0008828 - dATP pyrophosphohydrolase activity…	---	21315	19	21315	9.65357	0.0757948	9.34044	9.72119	9.8208	0.500109	0.424315	2	8.6993	0.00912151	0.00947435	105.548	8	0.0500109	1	0.848444	23.259	0.000322857	3.49099	9.62748	0.253524	-1.1322	0.369651	0.762549	-0.380756	-0.480365	-0.0996094	-5.21981	-6.58536	-1.47497	0.000613159	0.000117923	0.17547
67894_at	Fam45a	family with sequence similarity 45, memb	Mm.26148	ENSMUSG00000024993	NA	19	60811570	67894	NM_001167829 /// NM_026437 /// NP_001161301 /// NP_080713 /// XM_006527309 /// XM_006527310 /// XM_006527311 /// XP_006527372 /// XP_006527373 /// XP_006527374	---	GO:0005575 - cellular_component	GO:0003674 - molecular_function	GO:0008150 - biological_process	19830	28	19830	7.3177	0.100417	7.24627	7.625	7.06396	0.750983	0.650565	2	8.6993	0.0119519	0.0125522	79.6674	8	0.0750983	1	0.866285	27.2159	0.000180302	3.744	7.31175	0.286191	-0.228778	1.09457	-0.865788	-0.378729	0.182306	0.561035	-4.53577	2.18336	7.25748	0.00154247	0.0578781	5.6999e-05
107526_at	Gimap4	GTPase, IMAP family member 4	Mm.333048; Mm.486676; Mm.490512	ENSMUSG00000054435	NA	6	48684578	107526	NM_001243199 /// NM_001243200 /// NM_001243201 /// NM_174990 /// NM_175048 /// NP_001230128 /// NP_001230129 /// NP_001230130 /// NP_778155 /// NP_778213 /// XM_006505269 /// XM_006505270 /// XM_006505271 /// XP_006505332 /// XP_006505333 /// XP_006505334	---	GO:0005737 - cytoplasm /// GO:0005829 - cytosol	GO:0000166 - nucleotide binding /// GO:0005525 - GTP binding	---	2883	22	2883	7.68545	0.107282	7.34991	7.72632	7.89624	0.629464	0.522182	2	8.6993	0.012741	0.0134103	74.5697	8	0.0629464	1	0.829566	20.4921	0.000511091	3.2915	7.65749	0.279596	-1.1001	0.246178	0.85392	-0.376413	-0.546335	-0.169922	-4.3662	-6.33721	-2.12893	0.00195933	0.000156299	0.0631705
216441_at	Slc26a10	solute carrier family 26, member 10	Mm.248373	ENSMUSG00000040441	NA	10	-127172426	216441	NM_177615 /// NP_808283 /// XM_006513564 /// XM_006513565 /// XM_006513566 /// XM_006513567 /// XP_006513627 /// XP_006513628 /// XP_006513629 /// XP_006513630 /// XR_380388	---	GO:0005575 - cellular_component /// GO:0016021 - integral component of membrane /// GO:0016020 - membrane	GO:0003674 - molecular_function /// GO:0015116 - sulfate transmembrane transporter activity /// GO:0015297 - antiporter activity	GO:0008150 - biological_process /// GO:0006810 - transport /// GO:0008272 - sulfate transport	8978	29	8978	7.30755	0.0627032	6.92489	7.29224	7.60986	0.868493	0.805789	2	8.6993	0.00761661	0.0078379	127.585	8	0.0868493	1	0.927802	52.8968	1.35351e-05	4.86854	7.27566	0.342785	-1.0233	0.048345	0.974951	-0.367343	-0.68497	-0.317627	-5.51102	-10.2762	-5.14697	0.000422497	3.70083e-06	0.000674285
53375_at	Mtx2	metaxin 2	Mm.292613; Mm.478750	ENSMUSG00000027099	NA	2	74825812	53375	NM_016804 /// NP_058084	---	GO:0005739 - mitochondrion /// GO:0016020 - membrane /// GO:0005741 - mitochondrial outer membrane	GO:0003674 - molecular_function	GO:0008150 - biological_process /// GO:0006626 - protein targeting to mitochondrion /// GO:0006810 - transport /// GO:0015031 - protein transport	16351	17	16351	9.36501	0.0416346	9.19318	9.56006	9.29883	0.299905	0.258271	2	8.6993	0.00519474	0.00520432	192.148	8	0.0299905	1	0.861174	24.8589	0.000252696	3.5974	9.35069	0.188857	-0.834006	1.10861	-0.274607	-0.366877	-0.105646	0.26123	-6.66469	-1.91917	5.12575	0.000107935	0.0882947	0.000693311
20541_at	Slc8a1	solute carrier family 8 (sodium/calcium	Mm.265834; Mm.489060	ENSMUSG00000054640	NA	17	-81373105	20541	NM_001112798 /// NM_001286684 /// NM_011406 /// NP_001106269 /// NP_001273613 /// NP_035536 /// NR_104580 /// XM_006523932 /// XM_006523933 /// XM_006523934 /// XM_006523935 /// XM_006523936 /// XM_006523937 /// XM_006523938 /// XM_006523939 /// XM_006523940 /// XM_006523941 /// XM_006523942 /// XM_006523943 /// XM_006523944 /// XM_006523945 /// XM_006523946 /// XP_006523995 /// XP_006523996 /// …	04020 : Calcium signaling pathway /// 04260 : Cardiac muscle contraction /// 04974 : Protein digestion and absorption /// 05410 : Hypertrophic cardiomyopathy (HCM) /// 05412 : Arrhythmogenic right ventricular cardiomyopathy (ARVC) /// 05414 : Dilated cardiomyopathy	GO:0016021 - integral component of membrane /// GO:0005886 - plasma membrane /// GO:0016020 - membrane /// GO:0016323 - basolateral plasma membrane /// GO:0030315 - T-tubule /// GO:0042383 - sarcolemma /// GO:0005622 - intracellular /// GO:0005829 - cytosol /// GO:0005623 - cell /// GO:0005886 - plasma membrane /// GO:0005739 - mitochondrion /// GO:0005887 - integral component of plasma membrane …	GO:0086038 - calcium:sodium antiporter activity involved in regulation of cardiac muscle cell membrane potential /// GO:0005432 - calcium:sodium antiporter activity /// GO:0005432 - calcium:sodium antiporter activity /// GO:0005515 - protein binding /// GO:0030506 - ankyrin binding /// GO:0044325 - ion channel binding /// GO:0046872 - metal ion binding /// GO:0005516 - calmodulin binding /// GO:0…	GO:0086036 - regulation of cardiac muscle cell membrane potential /// GO:0006814 - sodium ion transport /// GO:0006816 - calcium ion transport /// GO:0035725 - sodium ion transmembrane transport /// GO:0001892 - embryonic placenta development /// GO:0002026 - regulation of the force of heart contraction /// GO:0002027 - regulation of heart rate /// GO:0006816 - calcium ion transport /// GO:001482…	7973	23	7973	7.98408	0.0855264	7.66918	8.03247	8.17188	0.533443	0.447917	2	8.6993	0.0102402	0.0106908	93.5384	8	0.0533443	1	0.839671	21.8705	0.000404095	3.39352	7.95784	0.259523	-1.11227	0.287559	0.824715	-0.363289	-0.502693	-0.139404	-4.70045	-6.50415	-1.94822	0.00122762	0.000129207	0.0843182
74006_at	Dnm1l	dynamin 1-like	Mm.218820	ENSMUSG00000022789	3.6.5.5	16	-16312228; -16312228	74006	NM_001025947 /// NM_001276340 /// NM_001276341 /// NM_152816 /// NP_001021118 /// NP_001263269 /// NP_001263270 /// NP_690029 /// NR_075074 /// XM_006522628 /// XM_006522629 /// XM_006522630 /// XM_006522631 /// XM_006522632 /// XM_006522633 /// XM_006522634 /// XM_006522635 /// XM_006522636 /// XM_006522637 /// XM_006522638 /// XM_006522639 /// XP_006522691 /// XP_006522692 /// XP_006522693 /// …	04144 : Endocytosis /// 04666 : Fc gamma R-mediated phagocytosis /// 05100 : Bacterial invasion of epithelial cells	GO:0005739 - mitochondrion /// GO:0005741 - mitochondrial outer membrane /// GO:0005739 - mitochondrion /// GO:0005829 - cytosol /// GO:0005905 - coated pit /// GO:0030054 - cell junction /// GO:0031410 - cytoplasmic vesicle /// GO:0045202 - synapse /// GO:0016020 - membrane /// GO:0005739 - mitochondrion /// GO:0005829 - cytosol /// GO:0005777 - peroxisome /// GO:0005737 - cytoplasm /// GO:00057…	GO:0005515 - protein binding /// GO:0000166 - nucleotide binding /// GO:0005525 - GTP binding /// GO:0008289 - lipid binding /// GO:0016787 - hydrolase activity /// GO:0003924 - GTPase activity /// GO:0042802 - identical protein binding /// GO:0031625 - ubiquitin protein ligase binding /// GO:0042803 - protein homodimerization activity	GO:0000266 - mitochondrial fission /// GO:0070266 - necroptotic process /// GO:0070585 - protein localization to mitochondrion /// GO:0006897 - endocytosis /// GO:0012501 - programmed cell death /// GO:0000266 - mitochondrial fission /// GO:0001836 - release of cytochrome c from mitochondria /// GO:0003374 - dynamin polymerization involved in mitochondrial fission /// GO:0006184 - GTP catabolic p…	22598	26	22598	9.12413	0.0475928	8.95969	9.31348	9.05811	0.289555	0.241962	2	8.6993	0.00587965	0.00594911	168.092	8	0.0289555	1	0.835635	20.5763	0.000503628	3.29789	9.11043	0.182602	-0.825462	1.11199	-0.286525	-0.353782	-0.0984109	0.255371	-6.0409	-1.68039	4.70989	0.000221005	0.12835	0.0012118
17149_at	Magoh	mago-nashi homolog, proliferation-associ	Mm.808	ENSMUSG00000028609	NA	4	107879813	17149	NM_001282737 /// NM_010760 /// NP_001269666 /// NP_034890	03013 : RNA transport /// 03015 : mRNA surveillance pathway /// 03040 : Spliceosome	GO:0005737 - cytoplasm /// GO:0005681 - spliceosomal complex /// GO:0005634 - nucleus /// GO:0035145 - exon-exon junction complex /// GO:0071013 - catalytic step 2 spliceosome	GO:0003723 - RNA binding /// GO:0044822 - poly(A) RNA binding	GO:0007292 - female gamete generation /// GO:0006397 - mRNA processing /// GO:0006417 - regulation of translation /// GO:0006810 - transport /// GO:0008380 - RNA splicing /// GO:0051028 - mRNA transport /// GO:0000184 - nuclear-transcribed mRNA catabolic process, nonsense-mediated decay /// GO:0000381 - regulation of alternative mRNA splicing, via spliceosome	6346	19	6346	7.97832	0.0807884	7.89708	8.24121	7.77637	0.540176	0.459388	2	8.6993	0.00969554	0.0100985	99.0242	8	0.0540176	1	0.850441	23.6907	0.000301788	3.5203	7.97155	0.241205	-0.308763	1.11797	-0.809205	-0.344135	0.120709	0.464844	-4.57598	1.60508	6.6763	0.0014583	0.144105	0.000106552
93686_at	Rbfox2	RNA binding protein, fox-1 homolog (C. e	Mm.202774	ENSMUSG00000033565	NA	15	-77078990; -77078990	93686	NM_001110827 /// NM_001110828 /// NM_001110829 /// NM_001110830 /// NM_001286417 /// NM_001286418 /// NM_001286419 /// NM_053104 /// NM_175387 /// NP_001104297 /// NP_001104298 /// NP_001104299 /// NP_001104300 /// NP_001273346 /// NP_001273347 /// NP_001273348 /// NP_444334 /// NP_780596 /// XM_006521564 /// XM_006521565 /// XM_006521566 /// XM_006521567 /// XM_006521568 /// XM_006521569 /// XM_…	---	GO:0005634 - nucleus /// GO:0005634 - nucleus /// GO:0005737 - cytoplasm	GO:0003723 - RNA binding /// GO:0003729 - mRNA binding /// GO:0005515 - protein binding /// GO:0000166 - nucleotide binding /// GO:0003676 - nucleic acid binding /// GO:0003714 - transcription corepressor activity /// GO:0003723 - RNA binding /// GO:0008134 - transcription factor binding /// GO:0044822 - poly(A) RNA binding	GO:0010724 - regulation of definitive erythrocyte differentiation /// GO:0000381 - regulation of alternative mRNA splicing, via spliceosome /// GO:0021942 - radial glia guided migration of Purkinje cell /// GO:0048813 - dendrite morphogenesis /// GO:0000381 - regulation of alternative mRNA splicing, via spliceosome /// GO:0050885 - neuromuscular process controlling balance /// GO:0006397 - mRNA p…	24668	23	24668	6.89661	0.0813014	6.60073	6.94458	7.07056	0.474164	0.392862	2	8.6993	0.00975451	0.0101627	98.3993	8	0.0474164	1	0.828537	20.1375	0.000544077	3.26434	6.87196	0.243185	-1.11529	0.298634	0.816661	-0.343846	-0.469823	-0.125977	-4.5583	-6.22835	-1.80386	0.00149468	0.000177284	0.105901
258431_at	Olfr937	olfactory receptor 937	Mm.271359	ENSMUSG00000094182	NA	9	-39059729	258431	NM_146439 /// NP_666650 /// XM_006510350 /// XM_006510351 /// XP_006510413 /// XP_006510414	04740 : Olfactory transduction	GO:0005886 - plasma membrane /// GO:0016020 - membrane /// GO:0016021 - integral component of membrane	GO:0004871 - signal transducer activity /// GO:0004930 - G-protein coupled receptor activity /// GO:0004984 - olfactory receptor activity	GO:0007165 - signal transduction /// GO:0050896 - response to stimulus /// GO:0007186 - G-protein coupled receptor signaling pathway /// GO:0007608 - sensory perception of smell /// GO:0050911 - detection of chemical stimulus involved in sensory perception of smell	12466	8	12466	1.80881	0.202838	1.83826	2.17676	1.41876	1.35553	1.15269	2	8.6993	0.0237253	0.0253547	39.4404	8	0.135553	1	0.850363	24.2925	0.000275163	3.56041	1.81126	0.379718	0.0711062	0.962549	-1.03366	-0.338497	0.419498	0.757996	-2.87734	3.56587	6.95946	0.0188937	0.00640373	7.81859e-05
12373_at	Casq2	calsequestrin 2	Mm.15343	ENSMUSG00000027861	NA	3	102086455	12373	NM_009814 /// NP_033944 /// XM_006500947 /// XP_006501010	---	GO:0016529 - sarcoplasmic reticulum /// GO:0030018 - Z disc /// GO:0030314 - junctional membrane complex /// GO:0033018 - sarcoplasmic reticulum lumen /// GO:0005622 - intracellular /// GO:0005737 - cytoplasm /// GO:0016529 - sarcoplasmic reticulum /// GO:0030018 - Z disc	GO:0005509 - calcium ion binding /// GO:0005509 - calcium ion binding /// GO:0005080 - protein kinase C binding /// GO:0042803 - protein homodimerization activity /// GO:0048306 - calcium-dependent protein binding	GO:0006937 - regulation of muscle contraction /// GO:0043267 - negative regulation of potassium ion transport /// GO:0010881 - regulation of cardiac muscle contraction by regulation of the release of sequestered calcium ion /// GO:0060306 - regulation of membrane repolarization /// GO:1901017 - negative regulation of potassium ion transmembrane transporter activity /// GO:0002027 - regulation of …	3992	23	3992	10.4711	0.0345064	10.3152	10.6494	10.4097	0.249734	0.215228	2	8.6993	0.00437534	0.00431329	231.841	8	0.0249734	1	0.861828	24.5956	0.000262847	3.5803	10.4581	0.172304	-0.829453	1.11043	-0.280978	-0.334251	-0.0945046	0.239746	-6.61619	-1.87063	5.12579	0.000113926	0.0953398	0.00069327
11881_at	Arsb	arylsulfatase B	Mm.300178; Mm.472255	ENSMUSG00000042082	3.1.6.12	13	93771679	11881	NM_009712 /// NP_033842	00531 : Glycosaminoglycan degradation /// 01100 : Metabolic pathways /// 04142 : Lysosome	GO:0005764 - lysosome /// GO:0005739 - mitochondrion /// GO:0005791 - rough endoplasmic reticulum /// GO:0005794 - Golgi apparatus /// GO:0070062 - extracellular vesicular exosome	GO:0004065 - arylsulfatase activity /// GO:0003824 - catalytic activity /// GO:0003943 - N-acetylgalactosamine-4-sulfatase activity /// GO:0046872 - metal ion binding /// GO:0016787 - hydrolase activity /// GO:0008484 - sulfuric ester hydrolase activity	GO:0008152 - metabolic process /// GO:0006914 - autophagy /// GO:0007417 - central nervous system development /// GO:0007584 - response to nutrient /// GO:0009268 - response to pH /// GO:0043627 - response to estrogen /// GO:0051597 - response to methylmercury	3732	26	3732	7.34572	0.0378332	7.19667	7.53052	7.27271	0.262403	0.22457	2	8.6993	0.00475776	0.00472915	211.455	8	0.0262403	1	0.85582	23.6003	0.000306054	3.5142	7.3333	0.174976	-0.780821	1.12712	-0.346297	-0.333844	-0.0760313	0.257812	-6.337	-1.44322	5.28588	0.000156337	0.183983	0.000562886
259018_at	Olfr1049	olfactory receptor 1049	Mm.223405	ENSMUSG00000075194	NA	2	-86254765	259018	NM_147016 /// NP_667227 /// XM_006499581 /// XP_006499644	04740 : Olfactory transduction	GO:0005886 - plasma membrane /// GO:0016020 - membrane /// GO:0016021 - integral component of membrane	GO:0004871 - signal transducer activity /// GO:0004930 - G-protein coupled receptor activity /// GO:0004984 - olfactory receptor activity	GO:0007165 - signal transduction /// GO:0050896 - response to stimulus /// GO:0007186 - G-protein coupled receptor signaling pathway /// GO:0007608 - sensory perception of smell /// GO:0050911 - detection of chemical stimulus involved in sensory perception of smell	12980	10	12980	1.89188	0.154495	1.86715	2.18994	1.61237	0.824205	0.66971	2	8.6993	0.0181683	0.0193119	51.7815	8	0.0824205	1	0.812552	18.4308	0.000744964	3.12786	1.88982	0.289454	-0.0783153	1.03686	-0.95854	-0.322791	0.254785	0.577576	-3.1355	2.4749	6.05992	0.0125246	0.0361446	0.000216071
231507_at	Plac8	placenta-specific 8	Mm.34609	ENSMUSG00000029322	NA	5	-100553733	231507	NM_139198 /// NP_631937	---	GO:0005634 - nucleus	GO:0003682 - chromatin binding /// GO:0005515 - protein binding	GO:0043066 - negative regulation of apoptotic process /// GO:0008284 - positive regulation of cell proliferation /// GO:0045944 - positive regulation of transcription from RNA polymerase II promoter /// GO:0042742 - defense response to bacterium /// GO:0009409 - response to cold /// GO:0040015 - negative regulation of multicellular organism growth /// GO:0050873 - brown fat cell differentiation /…	10607	18	10607	3.25092	0.222134	3.27032	3.59155	2.89575	1.19196	0.969829	2	8.6993	0.0259435	0.0277668	36.0143	8	0.119196	1	0.81364	18.6912	0.000709027	3.14934	3.25254	0.348241	0.0510434	0.973501	-1.02454	-0.321237	0.374564	0.695801	-2.61128	3.04476	6.10922	0.0289938	0.0144627	0.000203837
100217446_at	Snord47	small nucleolar RNA, C/D box 47	NA	ENSMUSG00000064968	NA	1	161038092	100217446	NR_028543	---	GO:0005575 - cellular_component	GO:0003674 - molecular_function	GO:0008150 - biological_process	773	18	773	10.6798	0.105313	10.6344	10.9551	10.4385	0.647554	0.542241	2	8.6993	0.0125147	0.0131641	75.964	8	0.0647554	1	0.837368	21.6642	0.000418226	3.37859	10.676	0.260798	-0.159425	1.07014	-0.91071	-0.320668	0.195934	0.516602	-3.75307	2.2932	6.53071	0.00481638	0.0484849	0.000125391
12798_at	Cnn2	calponin 2	Mm.157770	ENSMUSG00000004665	NA	10	79988600	12798	NM_007725 /// NP_031751	---	GO:0001725 - stress fiber /// GO:0016020 - membrane /// GO:0005925 - focal adhesion /// GO:0070062 - extracellular vesicular exosome	GO:0003779 - actin binding /// GO:0005516 - calmodulin binding	GO:0010628 - positive regulation of gene expression /// GO:0030097 - hemopoiesis /// GO:0030336 - negative regulation of cell migration /// GO:0042060 - wound healing /// GO:0042127 - regulation of cell proliferation /// GO:0050765 - negative regulation of phagocytosis /// GO:0031032 - actomyosin structure organization /// GO:0071260 - cellular response to mechanical stimulus /// GO:0032970 - reg…	4246	15	4246	7.76132	0.0350577	7.59458	7.90088	7.74683	0.197213	0.162155	2	8.6993	0.00443871	0.00438221	228.196	8	0.0197213	1	0.822234	18.266	0.000768856	3.11415	7.74743	0.153151	-0.99803	1.00196	-0.00392893	-0.3063	-0.152248	0.154053	-6.0195	-2.99201	3.27006	0.000226701	0.0157295	0.0101327
12331_at	Cap1	CAP, adenylate cyclase-associated protei	Mm.8687	ENSMUSG00000028656	NA	4	-122859228	12331	NM_001301067 /// NM_007598 /// NP_001287996 /// NP_031624 /// XM_006502695 /// XM_006502696 /// XM_006502697 /// XP_006502758 /// XP_006502759 /// XP_006502760	---	GO:0005737 - cytoplasm /// GO:0030864 - cortical actin cytoskeleton /// GO:0005886 - plasma membrane /// GO:0016020 - membrane /// GO:0005925 - focal adhesion /// GO:0070062 - extracellular vesicular exosome	GO:0005515 - protein binding /// GO:0003779 - actin binding	GO:0001667 - ameboidal cell migration /// GO:0030036 - actin cytoskeleton organization /// GO:0006898 - receptor-mediated endocytosis /// GO:0000902 - cell morphogenesis /// GO:0007010 - cytoskeleton organization	3957	22	3957	8.97235	0.0800157	8.92466	9.22461	8.75586	0.528852	0.448836	2	8.6993	0.00960671	0.010002	99.9804	8	0.0528852	1	0.848699	23.3605	0.000317743	3.49792	8.96838	0.237413	-0.184145	1.07927	-0.89513	-0.299953	0.168797	0.46875	-4.00689	2.25486	6.76346	0.00329784	0.0515791	9.67734e-05
50934_at	Slc7a8	solute carrier family 7 (cationic amino	Mm.276831	ENSMUSG00000022180	NA	14	-54722215	50934	NM_016972 /// NP_058668 /// XM_006519249 /// XM_006519250 /// XP_006519312 /// XP_006519313	04974 : Protein digestion and absorption	GO:0016021 - integral component of membrane /// GO:0016020 - membrane /// GO:0005737 - cytoplasm /// GO:0005886 - plasma membrane /// GO:0070062 - extracellular vesicular exosome /// GO:0005886 - plasma membrane	GO:0015179 - L-amino acid transmembrane transporter activity /// GO:0015171 - amino acid transmembrane transporter activity /// GO:0015101 - organic cation transmembrane transporter activity /// GO:0019534 - toxin transporter activity /// GO:0005275 - amine transmembrane transporter activity	GO:0015807 - L-amino acid transport /// GO:1902475 - L-alpha-amino acid transmembrane transport /// GO:0006810 - transport /// GO:0003333 - amino acid transmembrane transport /// GO:0006865 - amino acid transport /// GO:0015695 - organic cation transport /// GO:0098655 - cation transmembrane transport /// GO:1901998 - toxin transport /// GO:0006865 - amino acid transport /// GO:0015837 - amine tr…	16173	16	16173	5.33458	0.272116	5.39965	5.69458	4.92578	1.47168	1.19957	2	8.6993	0.031689	0.0340145	29.3992	8	0.147168	1	0.815099	18.9272	0.000678282	3.16859	5.34	0.387855	0.153786	0.914198	-1.06798	-0.294929	0.47387	0.768799	-2.16923	3.48535	6.10764	0.0592088	0.00724838	0.000204218
64082_at	Popdc2	popeye domain containing 2	Mm.390856	ENSMUSG00000022803	NA	16	38362210; 38362173	64082	NM_001081984 /// NM_022318 /// NP_001075453 /// NP_071713 /// XM_006522438 /// XM_006522439 /// XM_006522440 /// XP_006522501 /// XP_006522502 /// XP_006522503	---	GO:0016020 - membrane /// GO:0016021 - integral component of membrane	GO:0030552 - cAMP binding	GO:0002027 - regulation of heart rate /// GO:0060931 - sinoatrial node cell development /// GO:0042391 - regulation of membrane potential	18086	19	18086	10.8546	0.0289752	10.7389	11.0293	10.7666	0.222163	0.193188	2	8.6993	0.00373952	0.0036219	276.098	8	0.0222163	1	0.869577	25.8306	0.000219167	3.65922	10.8449	0.160253	-0.661525	1.15039	-0.488865	-0.290365	-0.0276693	0.262695	-6.21695	-0.592423	6.07519	0.000179653	0.568644	0.0002122
105501_at	Abhd4	abhydrolase domain containing 4	Mm.28771	ENSMUSG00000040997	NA	14	54259232; 54254129	105501	NM_001205181 /// NM_134076 /// NP_001192110 /// NP_598837 /// XM_006518367 /// XP_006518430 /// XR_383129	---	---	GO:0004620 - phospholipase activity /// GO:0010296 - prenylcysteine methylesterase activity /// GO:0016298 - lipase activity /// GO:0016787 - hydrolase activity /// GO:0018731 - 1-oxa-2-oxocycloheptane lactonase activity /// GO:0018732 - sulfolactone hydrolase activity /// GO:0018733 - 3,4-dihydrocoumarin hydrolase activity /// GO:0018734 - butyrolactone hydrolase activity /// GO:0034892 - endosu…	GO:0006629 - lipid metabolic process /// GO:0016042 - lipid catabolic process	2734	26	2734	7.63794	0.128052	7.63045	7.91626	7.36523	0.735542	0.60749	2	8.6993	0.0151286	0.0160065	62.4746	8	0.0735542	1	0.825908	20.0775	0.000549907	3.25971	7.63731	0.275577	-0.0249223	1.01223	-0.987306	-0.285815	0.265211	0.551025	-3.04247	2.82315	6.3356	0.0145153	0.0206096	0.000156589
16519_at	Kcnj3	potassium inwardly-rectifying channel, s	Mm.5127	ENSMUSG00000026824	NA	2	55437156	16519	NM_008426 /// NP_032452 /// XM_006497728 /// XM_006497729 /// XM_006497730 /// XM_006497731 /// XM_006497732 /// XP_006497791 /// XP_006497792 /// XP_006497793 /// XP_006497794 /// XP_006497795	---	GO:0016021 - integral component of membrane /// GO:0016020 - membrane /// GO:0009897 - external side of plasma membrane /// GO:0009986 - cell surface /// GO:0030315 - T-tubule	GO:0015467 - G-protein activated inward rectifier potassium channel activity /// GO:0005244 - voltage-gated ion channel activity /// GO:0005242 - inward rectifier potassium channel activity	GO:0034765 - regulation of ion transmembrane transport /// GO:0071805 - potassium ion transmembrane transport /// GO:0006810 - transport /// GO:0006811 - ion transport /// GO:0006813 - potassium ion transport /// GO:0071805 - potassium ion transmembrane transport	5840	26	5840	6.24183	0.0579517	5.94238	6.20508	6.50317	0.605563	0.547611	2	8.6993	0.00707042	0.00724396	138.046	8	0.0605563	1	0.904301	38.7255	4.66378e-05	4.33126	6.21688	0.280582	-0.978309	-0.042056	1.02036	-0.262695	-0.560791	-0.298096	-4.09045	-8.73213	-5.01358	0.00291691	1.36121e-05	0.000804021
20324_at	Sdpr	serum deprivation response	Mm.398690	ENSMUSG00000045954	NA	1	51289126	20324	NM_138741 /// NP_620080	---	GO:0016020 - membrane /// GO:0005829 - cytosol /// GO:0005737 - cytoplasm	GO:0008289 - lipid binding /// GO:0001786 - phosphatidylserine binding	GO:0045944 - positive regulation of transcription from RNA polymerase II promoter	7816	24	7816	8.89697	0.0547352	8.6131	8.86621	9.14062	0.537731	0.482996	2	8.6993	0.00670068	0.0068419	146.158	8	0.0537731	1	0.898211	36.0408	6.17024e-05	4.2097	8.87331	0.263832	-0.986268	-0.0269196	1.01319	-0.253107	-0.527521	-0.274414	-4.04843	-8.43766	-4.74091	0.00310223	1.78278e-05	0.00116136
66073_at	Txndc12	thioredoxin domain containing 12 (endopl	Mm.159965	ENSMUSG00000028567	1.8.4.2	4	108834678	66073	NM_025334 /// NP_079610	00480 : Glutathione metabolism	GO:0005783 - endoplasmic reticulum	GO:0016491 - oxidoreductase activity /// GO:0019153 - protein-disulfide reductase (glutathione) activity	GO:0055114 - oxidation-reduction process /// GO:0045454 - cell redox homeostasis	18281	19	18281	7.43189	0.0725202	7.40391	7.64941	7.23535	0.418645	0.346125	2	8.6993	0.00874509	0.00906502	110.314	8	0.0418645	1	0.826774	19.7896	0.000579008	3.23732	7.42956	0.208219	-0.123173	1.05588	-0.932708	-0.245502	0.168561	0.414062	-3.43727	2.36002	6.26179	0.00780778	0.0435233	0.000170526
14200_at	Fhl2	four and a half LIM domains 2	Mm.6799	ENSMUSG00000008136	NA	1	-43123074	14200	NM_001289533 /// NM_010212 /// NP_001276462 /// NP_034342 /// XM_006495696 /// XP_006495759	04380 : Osteoclast differentiation	GO:0005634 - nucleus /// GO:0005737 - cytoplasm /// GO:0005634 - nucleus /// GO:0005925 - focal adhesion /// GO:0015629 - actin cytoskeleton /// GO:0030018 - Z disc /// GO:0031430 - M band	GO:0005515 - protein binding /// GO:0046872 - metal ion binding /// GO:0008270 - zinc ion binding /// GO:0008134 - transcription factor binding /// GO:0042802 - identical protein binding	GO:0006357 - regulation of transcription from RNA polymerase II promoter /// GO:0045892 - negative regulation of transcription, DNA-templated /// GO:0006351 - transcription, DNA-templated /// GO:0006355 - regulation of transcription, DNA-templated /// GO:0000122 - negative regulation of transcription from RNA polymerase II promoter /// GO:0043066 - negative regulation of apoptotic process /// GO:…	4943	23	4943	11.8978	0.0141509	11.7282	11.9707	11.9521	0.133558	0.119407	2	8.6993	0.00203543	0.00176886	565.337	8	0.0133558	1	0.894047	29.3321	0.000135963	3.86658	11.8837	0.134995	-1.15197	0.644709	0.507262	-0.242543	-0.223988	0.0185547	-7.03884	-6.50036	0.581621	7.18047e-05	0.000129761	0.575581
232087_at	Mat2a	methionine adenosyltransferase II, alpha	Mm.29815; Mm.485037	ENSMUSG00000053907	2.5.1.6	6	-72432799	232087	NM_145569 /// NP_663544	00270 : Cysteine and methionine metabolism /// 01100 : Metabolic pathways	GO:0005829 - cytosol /// GO:0048269 - methionine adenosyltransferase complex	GO:0004478 - methionine adenosyltransferase activity /// GO:0000166 - nucleotide binding /// GO:0046872 - metal ion binding /// GO:0016740 - transferase activity /// GO:0004478 - methionine adenosyltransferase activity /// GO:0005524 - ATP binding /// GO:0016597 - amino acid binding	GO:0006556 - S-adenosylmethionine biosynthetic process /// GO:0006730 - one-carbon metabolic process /// GO:0006556 - S-adenosylmethionine biosynthetic process /// GO:0007623 - circadian rhythm /// GO:0042493 - response to drug /// GO:0009725 - response to hormone /// GO:0051591 - response to cAMP	10681	10	10681	8.73809	0.185312	8.81765	9.05664	8.35986	1.18242	0.997109	2	8.6993	0.0217107	0.023164	43.1704	8	0.118242	1	0.843277	22.9635	0.000338328	3.47066	8.74472	0.354068	0.205982	0.88097	-1.08695	-0.238991	0.457786	0.696777	-2.12367	4.06787	6.68762	0.0637065	0.003015	0.000105223
234463_at	Tmem184c	transmembrane protein 184C	Mm.273578; Mm.449857	ENSMUSG00000031617	NA	8	-77595978	234463	NM_145599 /// NP_663574 /// XM_006530852 /// XM_006530853 /// XP_006530915 /// XP_006530916	---	GO:0016021 - integral component of membrane /// GO:0016020 - membrane	GO:0003674 - molecular_function	GO:0008150 - biological_process	10942	27	10942	7.53236	0.144367	7.5646	7.80322	7.2373	0.789182	0.644815	2	8.6993	0.017004	0.0180458	55.4144	8	0.0789182	1	0.817068	18.9607	0.000674051	3.17131	7.53504	0.284115	0.104036	0.943915	-1.04795	-0.238622	0.327296	0.565918	-2.39594	3.2863	6.13752	0.0410678	0.0098781	0.000197157
16985_at	Lsp1	lymphocyte specific 1	Mm.234003	ENSMUSG00000018819	NA	7	142460812; 142471843; 142477013	16985	NM_001136071 /// NM_001271508 /// NM_001271509 /// NM_001271510 /// NM_001271523 /// NM_019391 /// NP_001129543 /// NP_001258437 /// NP_001258438 /// NP_001258439 /// NP_001258452 /// NP_062264 /// XM_006508494 /// XM_006508495 /// XM_006508496 /// XM_006508497 /// XP_006508557 /// XP_006508558 /// XP_006508559 /// XP_006508560	---	GO:0005886 - plasma membrane /// GO:0016020 - membrane /// GO:0070062 - extracellular vesicular exosome	GO:0003779 - actin binding /// GO:0004871 - signal transducer activity	GO:0007010 - cytoskeleton organization /// GO:0006915 - apoptotic process /// GO:0006952 - defense response /// GO:0006935 - chemotaxis /// GO:0007165 - signal transduction	6080	28	6080	6.6111	0.0406365	6.6258	6.85327	6.35791	0.532293	0.491657	2	8.6993	0.00508001	0.00507957	196.867	8	0.0532293	1	0.923658	48.3913	1.93336e-05	4.71369	6.61233	0.247955	0.0543329	0.971726	-1.02606	-0.227472	0.267889	0.495361	-4.17867	4.92112	9.8289	0.00256518	0.000909697	5.30063e-06
17164_at	Mapkapk2	MAP kinase-activated protein kinase 2	Mm.221235; Mm.490983	ENSMUSG00000016528	2.7.11.1	1	-131053704	17164	NM_008551 /// NP_032577	04010 : MAPK signaling pathway /// 04370 : VEGF signaling pathway /// 04722 : Neurotrophin signaling pathway	GO:0005634 - nucleus /// GO:0005737 - cytoplasm /// GO:0005634 - nucleus /// GO:0005737 - cytoplasm /// GO:0005813 - centrosome	GO:0004674 - protein serine/threonine kinase activity /// GO:0005515 - protein binding /// GO:0000166 - nucleotide binding /// GO:0004672 - protein kinase activity /// GO:0005524 - ATP binding /// GO:0016301 - kinase activity /// GO:0016740 - transferase activity /// GO:0016772 - transferase activity, transferring phosphorus-containing groups /// GO:0004674 - protein serine/threonine kinase activ…	GO:0006468 - protein phosphorylation /// GO:0048839 - inner ear development /// GO:0002224 - toll-like receptor signaling pathway /// GO:0006954 - inflammatory response /// GO:0032496 - response to lipopolysaccharide /// GO:0032675 - regulation of interleukin-6 production /// GO:0032680 - regulation of tumor necrosis factor production /// GO:0044351 - macropinocytosis /// GO:0048255 - mRNA stabil…	6366	23	6366	9.3165	0.05356	9.10582	9.32861	9.4624	0.27245	0.21889	2	8.6993	0.00656558	0.006695	149.365	8	0.027245	1	0.803414	16.6695	0.00105715	2.97586	9.29895	0.180131	-1.07212	0.164696	0.907428	-0.222789	-0.356578	-0.133789	-3.59998	-5.76183	-2.33506	0.00607785	0.00030945	0.0453144
66109_at	Tspan13	tetraspanin 13	Mm.254663	ENSMUSG00000020577	NA	12	-36014555	66109	NM_025359 /// NP_079635	---	GO:0016021 - integral component of membrane /// GO:0016020 - membrane	GO:0003674 - molecular_function	GO:0008150 - biological_process	18307	21	18307	8.24462	0.0522193	8.01281	8.23389	8.4292	0.350161	0.297941	2	8.6993	0.00641147	0.00652741	153.2	8	0.0350161	1	0.85087	23.235	0.00032408	3.48935	8.2253	0.208326	-1.01997	0.0412184	0.978753	-0.221073	-0.416386	-0.195312	-3.61492	-6.80861	-3.44958	0.0059406	9.20978e-05	0.00766041
67622_at	Mxra7	matrix-remodelling associated 7	Mm.64962; Mm.442120	ENSMUSG00000020814	NA	11	-116803400	67622	NM_026280 /// NP_080556 /// XM_006534005 /// XM_006534006 /// XP_006534068 /// XP_006534069 /// XR_388510	---	GO:0005575 - cellular_component /// GO:0016021 - integral component of membrane /// GO:0016020 - membrane	GO:0003674 - molecular_function	GO:0008150 - biological_process	19635	19	19635	7.36203	0.0357385	7.32061	7.53857	7.21655	0.250212	0.214473	2	8.6993	0.00451697	0.00446731	223.849	8	0.0250212	1	0.857167	23.7408	0.000299451	3.52367	7.35858	0.164334	-0.231054	1.0953	-0.864249	-0.217966	0.104056	0.322021	-4.24626	2.02714	6.77605	0.00232644	0.0743569	9.54443e-05
71712_at	Dram1	DNA-damage regulated autophagy modulator	Mm.35450	ENSMUSG00000020057	NA	10	-88322804	71712	NM_027878 /// NP_082154 /// XM_006514149 /// XP_006514212 /// XR_380446	---	GO:0005764 - lysosome /// GO:0016021 - integral component of membrane /// GO:0016020 - membrane /// GO:0005764 - lysosome /// GO:0005737 - cytoplasm	GO:0003674 - molecular_function	GO:0030262 - apoptotic nuclear changes /// GO:0006915 - apoptotic process /// GO:0006914 - autophagy /// GO:0010506 - regulation of autophagy	21494	23	21494	5.50387	0.151133	5.59461	5.81177	5.12793	1.12036	0.969228	2	8.6993	0.0177818	0.0188916	52.9335	8	0.112036	1	0.865103	27.2534	0.000179372	3.74624	5.51144	0.349424	0.238029	0.859508	-1.09754	-0.217159	0.466679	0.683838	-2.13222	4.58218	7.25238	0.0628375	0.00144577	5.73035e-05
14584_at	Gfpt2	glutamine fructose-6-phosphate transamin	Mm.24402	ENSMUSG00000020363	2.6.1.16	11	49794155	14584	NM_013529 /// NP_038557	00250 : Alanine, aspartate and glutamate metabolism /// 00520 : Amino sugar and nucleotide sugar metabolism /// 01100 : Metabolic pathways	---	GO:0004360 - glutamine-fructose-6-phosphate transaminase (isomerizing) activity /// GO:0030246 - carbohydrate binding /// GO:0008483 - transaminase activity /// GO:0016740 - transferase activity	GO:0006541 - glutamine metabolic process /// GO:0008152 - metabolic process /// GO:0005975 - carbohydrate metabolic process /// GO:0016051 - carbohydrate biosynthetic process	5140	29	5140	7.0691	0.357939	7.22212	7.43213	6.59131	1.86849	1.51055	2	8.6993	0.0415545	0.0447424	22.3502	8	0.186849	1	0.808434	18.1755	0.000782387	3.10658	7.08185	0.437609	0.320537	0.80043	-1.12097	-0.210005	0.630815	0.84082	-1.34885	4.05168	5.83323	0.211446	0.00308749	0.000283635
14132_at	Fcgrt	Fc receptor, IgG, alpha chain transporte	Mm.3303	ENSMUSG00000003420	NA	7	-45092993	14132	NM_010189 /// NP_034319 /// XM_006540603 /// XP_006540666	---	GO:0005886 - plasma membrane /// GO:0016021 - integral component of membrane /// GO:0016020 - membrane	GO:0003823 - antigen binding /// GO:0019770 - IgG receptor activity /// GO:0030881 - beta-2-microglobulin binding /// GO:0019864 - IgG binding /// GO:0030881 - beta-2-microglobulin binding	GO:0019882 - antigen processing and presentation /// GO:0038094 - Fc-gamma receptor signaling pathway /// GO:0006955 - immune response	4900	20	4900	9.27797	0.0748553	9.32457	9.52197	8.99902	0.630765	0.55591	2	8.6993	0.00901351	0.00935691	106.873	8	0.0630765	1	0.881326	30.8376	0.000112414	3.94918	9.28186	0.264079	0.161759	0.909259	-1.07102	-0.197399	0.32555	0.522949	-2.72232	4.48965	7.78982	0.0242386	0.00164547	3.31783e-05
16521_at	Kcnj5	potassium inwardly-rectifying channel, s	Mm.69472	ENSMUSG00000032034	NA	9	-32314783	16521	NM_010605 /// NP_034735 /// XM_006510039 /// XM_006510040 /// XM_006510041 /// XP_006510102 /// XP_006510103 /// XP_006510104	---	GO:0016021 - integral component of membrane /// GO:0016020 - membrane /// GO:0009897 - external side of plasma membrane /// GO:0030315 - T-tubule	GO:0005244 - voltage-gated ion channel activity /// GO:0015467 - G-protein activated inward rectifier potassium channel activity /// GO:0005242 - inward rectifier potassium channel activity	GO:0006810 - transport /// GO:0006811 - ion transport /// GO:0006813 - potassium ion transport /// GO:0034765 - regulation of ion transmembrane transport /// GO:0071805 - potassium ion transmembrane transport	5842	23	5842	5.64413	0.0330527	5.44839	5.64258	5.79248	0.236036	0.202983	2	8.6993	0.00420823	0.00413158	242.038	8	0.0236036	1	0.859968	24.1174	0.000282599	3.54883	5.62782	0.172519	-1.04003	0.0855664	0.954467	-0.194188	-0.34409	-0.149902	-3.91935	-6.94487	-3.26794	0.00375425	7.94251e-05	0.0101666
12493_at	Cd37	CD37 antigen	Mm.3689	ENSMUSG00000030798	NA	7	-45233632	12493	NM_001290802 /// NM_001290804 /// NM_007645 /// NP_001277731 /// NP_001277733 /// NP_031671 /// XM_006540592 /// XM_006540593 /// XM_006540594 /// XP_006540655 /// XP_006540656 /// XP_006540657	04640 : Hematopoietic cell lineage	GO:0016021 - integral component of membrane /// GO:0001772 - immunological synapse /// GO:0016020 - membrane /// GO:0070062 - extracellular vesicular exosome	---	GO:0002639 - positive regulation of immunoglobulin production /// GO:0002920 - regulation of humoral immune response /// GO:0008285 - negative regulation of cell proliferation /// GO:0030886 - negative regulation of myeloid dendritic cell activation /// GO:0042832 - defense response to protozoan /// GO:0050688 - regulation of defense response to virus	4066	20	4066	5.3323	0.0703189	5.3418	5.53223	5.12524	0.401961	0.331642	2	8.6993	0.00849206	0.00878987	113.767	8	0.0401961	1	0.82506	19.5266	0.000607273	3.21662	5.33309	0.203631	0.0427621	0.977933	-1.0207	-0.19043	0.216553	0.406982	-2.70564	3.0768	6.24574	0.0248989	0.0137452	0.000173733
76062_at	5830428M24Rik	RIKEN cDNA 5830428M24 gene	Mm.380755; Mm.486006	NA	NA	12	-69464787	76062	NR_038060 /// NR_038061	---	-----	-----	-----	23545	22	23545	2.21635	0.0178866	2.05532	2.24451	2.30896	0.133153	0.115266	2	8.6993	0.00246486	0.00223582	447.263	8	0.0133153	1	0.865669	23.3818	0.000316683	3.49938	2.20293	0.131831	-1.11967	0.315379	0.804288	-0.189183	-0.253636	-0.0644531	-4.98916	-6.68893	-1.83596	0.000830576	0.000105071	0.100694
68916_at	Cdkal1	CDK5 regulatory subunit associated prote	Mm.212227	ENSMUSG00000006191	NA	13	-29325306	68916	NM_144536 /// NP_653119 /// XM_006516761 /// XM_006516762 /// XM_006516763 /// XM_006516764 /// XP_006516824 /// XP_006516825 /// XP_006516826 /// XP_006516827 /// XR_382070 /// XR_382071	---	GO:0005783 - endoplasmic reticulum /// GO:0005791 - rough endoplasmic reticulum /// GO:0016021 - integral component of membrane /// GO:0016020 - membrane	GO:0035598 - N6-threonylcarbomyladenosine methylthiotransferase activity /// GO:0003824 - catalytic activity /// GO:0046872 - metal ion binding /// GO:0016740 - transferase activity /// GO:0043842 - Kdo transferase activity /// GO:0051536 - iron-sulfur cluster binding /// GO:0051539 - 4 iron, 4 sulfur cluster binding	GO:0035600 - tRNA methylthiolation /// GO:1990145 - maintenance of translational fidelity /// GO:0008033 - tRNA processing /// GO:0009451 - RNA modification /// GO:0043412 - macromolecule modification	20325	26	20325	7.37188	0.0914018	7.40196	7.5896	7.13159	0.514677	0.423275	2	8.6993	0.0109156	0.0114252	87.5257	8	0.0514677	1	0.822409	19.3886	0.000622776	3.20567	7.37438	0.230246	0.119766	0.934724	-1.05449	-0.187641	0.270367	0.458008	-2.3515	3.38823	6.19962	0.0441266	0.00842537	0.000183323
545428_at	Ccdc141	coiled-coil domain containing 141	Mm.26579	ENSMUSG00000044033	NA	2	-77009906	545428	NM_001025576 /// NP_001020747 /// XM_006499911 /// XM_006499912 /// XM_006499913 /// XM_006499914 /// XM_006499915 /// XM_006499916 /// XM_006499917 /// XP_006499974 /// XP_006499975 /// XP_006499976 /// XP_006499977 /// XP_006499978 /// XP_006499979 /// XP_006499980	---	GO:0005737 - cytoplasm /// GO:0005813 - centrosome	GO:0005515 - protein binding	GO:0021799 - cerebral cortex radially oriented cell migration /// GO:0051642 - centrosome localization	16603	23	16603	8.02129	0.0382856	7.99766	8.17529	7.88501	0.209117	0.170832	2	8.6993	0.00480977	0.00478571	208.956	8	0.0209117	1	0.816918	17.7588	0.000848581	3.07131	8.01932	0.146349	-0.147999	1.06575	-0.917753	-0.177631	0.112652	0.290283	-3.35349	2.12677	5.91936	0.00889353	0.0633905	0.000255577
71911_at	Bdh1	3-hydroxybutyrate dehydrogenase, type 1	Mm.293470	ENSMUSG00000046598	1.1.1.30	16	31422297; 31428753	71911	NM_001122683 /// NM_175177 /// NP_001116155 /// NP_780386	00072 : Synthesis and degradation of ketone bodies /// 00650 : Butanoate metabolism /// 01100 : Metabolic pathways	GO:0005739 - mitochondrion /// GO:0005743 - mitochondrial inner membrane /// GO:0005739 - mitochondrion /// GO:0005634 - nucleus /// GO:0005743 - mitochondrial inner membrane	GO:0003824 - catalytic activity /// GO:0016491 - oxidoreductase activity /// GO:0003858 - 3-hydroxybutyrate dehydrogenase activity /// GO:0005543 - phospholipid binding	GO:0008152 - metabolic process /// GO:0055114 - oxidation-reduction process	21620	18	21620	8.31008	0.0522836	8.02237	8.19482	8.64111	0.792079	0.739795	2	8.6993	0.00641886	0.00653545	153.012	8	0.0792079	1	0.933992	57.6267	9.58292e-06	5.0185	8.2861	0.31931	-0.82594	-0.285863	1.1118	-0.172452	-0.618741	-0.446289	-2.81826	-10.1116	-7.87775	0.020772	4.21705e-06	3.0425e-05
75219_at	Dusp18	dual specificity phosphatase 18	Mm.32588	ENSMUSG00000047205	NA	11	3895240	75219	NM_173745 /// NP_776106 /// XM_006514873 /// XP_006514936	---	GO:0005739 - mitochondrion /// GO:0005737 - cytoplasm /// GO:0005743 - mitochondrial inner membrane /// GO:0005758 - mitochondrial intermembrane space /// GO:0031304 - intrinsic component of mitochondrial inner membrane /// GO:0031314 - extrinsic component of mitochondrial inner membrane /// GO:0016020 - membrane /// GO:0005634 - nucleus /// GO:0005737 - cytoplasm /// GO:0005758 - mitochondrial i…	GO:0016791 - phosphatase activity /// GO:0008138 - protein tyrosine/serine/threonine phosphatase activity /// GO:0004721 - phosphoprotein phosphatase activity /// GO:0016787 - hydrolase activity /// GO:0017017 - MAP kinase tyrosine/serine/threonine phosphatase activity /// GO:0004725 - protein tyrosine phosphatase activity	GO:0006612 - protein targeting to membrane /// GO:0006626 - protein targeting to mitochondrion /// GO:0016311 - dephosphorylation /// GO:0046677 - response to antibiotic /// GO:0033365 - protein localization to organelle /// GO:0035335 - peptidyl-tyrosine dephosphorylation /// GO:0006470 - protein dephosphorylation /// GO:0035335 - peptidyl-tyrosine dephosphorylation	23194	24	23194	7.36434	0.1638	7.04847	7.20435	7.76123	1.1956	1.0318	2	8.6993	0.0192378	0.020475	48.8401	8	0.11956	1	0.862997	26.8168	0.000190561	3.71997	7.33802	0.374709	-0.772716	-0.356732	1.12945	-0.155873	-0.712757	-0.556885	-1.47141	-6.7283	-5.67809	0.176406	0.000100595	0.000343028
18442_at	P2ry2	purinergic receptor P2Y, G-protein coupl	Mm.3000	ENSMUSG00000032860	NA	7	-100996572	18442	NM_008773 /// NP_032799 /// XM_006507432 /// XM_006507433 /// XP_006507495 /// XP_006507496	04080 : Neuroactive ligand-receptor interaction	GO:0005886 - plasma membrane /// GO:0016021 - integral component of membrane /// GO:0016020 - membrane /// GO:0005764 - lysosome /// GO:0005739 - mitochondrion /// GO:0005829 - cytosol /// GO:0005769 - early endosome /// GO:0016323 - basolateral plasma membrane /// GO:0016324 - apical plasma membrane	GO:0004871 - signal transducer activity /// GO:0004930 - G-protein coupled receptor activity /// GO:0045028 - G-protein coupled purinergic nucleotide receptor activity /// GO:0005524 - ATP binding /// GO:0031686 - A1 adenosine receptor binding /// GO:0045030 - UTP-activated nucleotide receptor activity	GO:0070257 - positive regulation of mucus secretion /// GO:0007165 - signal transduction /// GO:0007200 - phospholipase C-activating G-protein coupled receptor signaling pathway /// GO:0007186 - G-protein coupled receptor signaling pathway /// GO:0007204 - positive regulation of cytosolic calcium ion concentration /// GO:0010976 - positive regulation of neuron projection development /// GO:001491…	6916	24	6916	6.30492	0.0540287	6.34428	6.4978	6.08252	0.40534	0.351311	2	8.6993	0.00661946	0.00675358	148.07	8	0.040534	1	0.866708	26.5362	0.000198207	3.70288	6.3082	0.20998	0.171831	0.90295	-1.07478	-0.15352	0.261763	0.415283	-2.47056	4.21249	7.21852	0.0363994	0.00244261	5.93708e-05
56529_at	Sec11a	SEC11 homolog A (S. cerevisiae)	Mm.43760	ENSMUSG00000025724	3.4.-.-	7	-80915379	56529	NM_019951 /// NP_064335	03060 : Protein export	GO:0016021 - integral component of membrane /// GO:0016020 - membrane /// GO:0005783 - endoplasmic reticulum /// GO:0043231 - intracellular membrane-bounded organelle /// GO:0070062 - extracellular vesicular exosome	GO:0008236 - serine-type peptidase activity /// GO:0008233 - peptidase activity /// GO:0016787 - hydrolase activity	GO:0008150 - biological_process /// GO:0006465 - signal peptide processing /// GO:0006508 - proteolysis	17086	14	17086	8.06601	0.0421001	8.06821	8.21729	7.91309	0.227194	0.185094	2	8.6993	0.00524825	0.00526251	190.023	8	0.0227194	1	0.814696	17.6339	0.000869753	3.0606	8.06619	0.15211	0.0132618	0.993303	-1.00656	-0.149074	0.155125	0.304199	-2.69424	2.80361	5.93835	0.0253609	0.0212667	0.000249807
72265_at	Tram1	translocating chain-associating membrane	Mm.28765	ENSMUSG00000025935	NA	1	-13564702	72265	NM_028173 /// NP_082449	04141 : Protein processing in endoplasmic reticulum	GO:0005575 - cellular_component /// GO:0016021 - integral component of membrane /// GO:0016020 - membrane /// GO:0005783 - endoplasmic reticulum	GO:0003674 - molecular_function	GO:0006810 - transport /// GO:0015031 - protein transport	21814	26	21814	8.62193	0.0188526	8.59943	8.74268	8.51807	0.12184	0.102987	2	8.6993	0.00257591	0.00235657	424.345	8	0.012184	1	0.845267	19.9905	0.000558513	3.25297	8.62006	0.113716	-0.181383	1.07828	-0.896894	-0.143244	0.0813654	0.224609	-3.69533	2.09902	6.25861	0.00525619	0.0662768	0.000171158
214384_at	Myocd	myocardin	Mm.32257	ENSMUSG00000020542	NA	11	-65176571	214384	NM_145136 /// NM_146386 /// NP_660118 /// NP_666498 /// XM_006532816 /// XM_006532817 /// XP_006532879 /// XP_006532880 /// XR_388399	---	GO:0005634 - nucleus /// GO:0070514 - SRF-myogenin-E12 complex /// GO:0005634 - nucleus	GO:0001076 - RNA polymerase II transcription factor binding transcription factor activity /// GO:0003713 - transcription coactivator activity /// GO:0005515 - protein binding /// GO:0001076 - RNA polymerase II transcription factor binding transcription factor activity /// GO:0035035 - histone acetyltransferase binding /// GO:0042826 - histone deacetylase binding /// GO:0070412 - R-SMAD binding //…	GO:0001560 - regulation of cell growth by extracellular stimulus /// GO:0006357 - regulation of transcription from RNA polymerase II promoter /// GO:0008284 - positive regulation of cell proliferation /// GO:0045893 - positive regulation of transcription, DNA-templated /// GO:0030511 - positive regulation of transforming growth factor beta receptor signaling pathway /// GO:0035065 - regulation of…	8790	34	8790	7.39062	0.0922579	7.16729	7.30957	7.63916	0.515254	0.422996	2	8.6993	0.011014	0.0115322	86.7135	8	0.0515254	1	0.820947	19.2027	0.00064444	3.19082	7.37201	0.242053	-0.845758	-0.257943	1.1037	-0.142282	-0.471872	-0.32959	-1.77509	-5.887	-4.44137	0.110779	0.000265748	0.00176128
57321_at	Terf2ip	telomeric repeat binding factor 2, inter	Mm.213064	ENSMUSG00000033430	NA	8	112011359	57321	NM_020584 /// NP_065609	---	GO:0000781 - chromosome, telomeric region /// GO:0000784 - nuclear chromosome, telomeric region /// GO:0005634 - nucleus /// GO:0005635 - nuclear envelope /// GO:0005737 - cytoplasm /// GO:0000781 - chromosome, telomeric region /// GO:0005694 - chromosome /// GO:0000781 - chromosome, telomeric region /// GO:0000783 - nuclear telomere cap complex /// GO:0000784 - nuclear chromosome, telomeric regi…	GO:0005515 - protein binding /// GO:0003677 - DNA binding	GO:0043123 - positive regulation of I-kappaB kinase/NF-kappaB signaling /// GO:0006355 - regulation of transcription, DNA-templated /// GO:0010569 - regulation of double-strand break repair via homologous recombination /// GO:0010833 - telomere maintenance via telomere lengthening /// GO:0048239 - negative regulation of DNA recombination at telomere /// GO:0051092 - positive regulation of NF-kapp…	17253	16	17253	6.97092	0.07153	7.01968	7.15674	6.74854	0.414596	0.343066	2	8.6993	0.00863127	0.00894125	111.841	8	0.0414596	1	0.827471	19.8734	0.000570347	3.24386	6.97498	0.207739	0.215149	0.874914	-1.09006	-0.137059	0.271144	0.408203	-1.93158	3.82124	6.21375	0.0865752	0.00434676	0.000180324
68545_at	Ecscr	endothelial cell surface expressed chemo	Mm.329362	ENSMUSG00000073599	NA	18	-35713089	68545	NM_001033141 /// NP_001028313 /// XM_006526210 /// XP_006526273	---	GO:0005886 - plasma membrane /// GO:0016021 - integral component of membrane /// GO:0016020 - membrane /// GO:0005737 - cytoplasm	---	GO:0001525 - angiogenesis /// GO:0006915 - apoptotic process /// GO:0006935 - chemotaxis /// GO:0007275 - multicellular organismal development /// GO:0030154 - cell differentiation	20169	24	20169	7.07668	0.0439799	6.89998	7.02563	7.26025	0.282872	0.238893	2	8.6993	0.00546434	0.00549749	181.901	8	0.0282872	1	0.844524	21.8592	0.000404853	3.3927	7.06195	0.182864	-0.885786	-0.198619	1.0844	-0.125658	-0.360278	-0.234619	-2.22569	-6.38131	-4.48859	0.0540633	0.000148584	0.00164793
103554_at	Psme4	proteasome (prosome, macropain) activato	Mm.240066	ENSMUSG00000040850	NA	11	30771775	103554	NM_134013 /// NP_598774 /// XM_006514429 /// XP_006514492	03050 : Proteasome	GO:0005829 - cytosol /// GO:0005634 - nucleus /// GO:1990111 - spermatoproteasome complex /// GO:0000502 - proteasome complex /// GO:0005737 - cytoplasm /// GO:0005634 - nucleus	GO:0016504 - peptidase activator activity /// GO:0070577 - lysine-acetylated histone binding	GO:0006974 - cellular response to DNA damage stimulus /// GO:0010499 - proteasomal ubiquitin-independent protein catabolic process /// GO:0010952 - positive regulation of peptidase activity /// GO:0006281 - DNA repair /// GO:0035093 - spermatogenesis, exchange of chromosomal proteins /// GO:0007275 - multicellular organismal development /// GO:0007283 - spermatogenesis /// GO:0030154 - cell diffe…	2587	41	2587	8.78698	0.0480057	8.60695	8.73193	8.97705	0.301868	0.253862	2	8.6993	0.00592711	0.00600071	166.647	8	0.0301868	1	0.840971	21.4154	0.000436079	3.36044	8.77198	0.188273	-0.876544	-0.212692	1.08924	-0.124985	-0.370102	-0.245117	-2.12559	-6.29422	-4.50264	0.0635107	0.000164242	0.00161573
225020_at	Fez2	fasciculation and elongation protein zet	Mm.236835	ENSMUSG00000056121	NA	17	-78377885	225020	NM_001285940 /// NM_001285946 /// NM_001285949 /// NM_199448 /// NP_001272869 /// NP_001272875 /// NP_001272878 /// NP_955519 /// XM_006524189 /// XP_006524252	---	GO:0005575 - cellular_component	GO:0005515 - protein binding	GO:0008150 - biological_process	9873	27	9873	7.86138	0.0278645	7.71277	7.83081	8.00342	0.178554	0.15069	2	8.6993	0.00361184	0.00348306	287.104	8	0.0178554	1	0.843944	20.8605	0.000479388	3.31931	7.849	0.146174	-0.931957	-0.124439	1.0564	-0.118038	-0.290646	-0.172607	-2.57158	-6.33201	-4.06172	0.0309143	0.000157238	0.0030423
74954_at	4930503E14Rik	RIKEN cDNA 4930503E14 gene	Mm.425904	ENSMUSG00000072595	NA	14	-44163167	74954	NM_029131 /// NP_083407 /// XM_006519637 /// XM_006519638 /// XP_006519700 /// XP_006519701	---	GO:0005575 - cellular_component	GO:0003674 - molecular_function	GO:0008150 - biological_process	23058	15	23058	2.03676	0.0248131	2.10225	2.20923	1.81519	0.353043	0.32823	2	8.6993	0.00326108	0.00310164	322.41	8	0.0353043	1	0.929716	50.3253	1.65304e-05	4.78172	2.04222	0.203765	0.2946	0.819607	-1.11421	-0.106978	0.287065	0.394043	-2.45276	6.58174	9.75838	0.0374624	0.000118402	5.61665e-06
23972_at	Papss2	3'-phosphoadenosine 5'-phosphosulfate sy	Mm.203916	ENSMUSG00000024899	2.7.1.25 /// 2.7.7.4	19	32595715; 32620005	23972	NM_001201470 /// NM_011864 /// NP_001188399 /// NP_035994 /// XM_006527064 /// XM_006527065 /// XP_006527127 /// XP_006527128	00230 : Purine metabolism /// 00450 : Selenocompound metabolism /// 00920 : Sulfur metabolism /// 01100 : Metabolic pathways	---	GO:0004020 - adenylylsulfate kinase activity /// GO:0004781 - sulfate adenylyltransferase (ATP) activity /// GO:0000166 - nucleotide binding /// GO:0003824 - catalytic activity /// GO:0005524 - ATP binding /// GO:0016301 - kinase activity /// GO:0016740 - transferase activity /// GO:0016779 - nucleotidyltransferase activity	GO:0000103 - sulfate assimilation /// GO:0016310 - phosphorylation /// GO:0007596 - blood coagulation /// GO:0060348 - bone development /// GO:0008152 - metabolic process	11442	24	11442	7.31052	0.197308	7.48071	7.5813	6.91211	1.21241	1.0151	2	8.6993	0.0230897	0.0246635	40.5457	8	0.121241	1	0.837259	21.9816	0.000396731	3.4015	7.3247	0.36084	0.432327	0.711102	-1.14343	-0.100593	0.568596	0.669189	-0.866766	4.89933	6.22809	0.40934	0.000936731	0.000177337
15277_at	Hk2	hexokinase 2	Mm.255848; Mm.469167	ENSMUSG00000000628	2.7.1.1	6	-82725027	15277	NM_013820 /// NP_038848 /// XM_006505606 /// XP_006505669	00010 : Glycolysis / Gluconeogenesis /// 00051 : Fructose and mannose metabolism /// 00052 : Galactose metabolism /// 00500 : Starch and sucrose metabolism /// 00520 : Amino sugar and nucleotide sugar metabolism /// 00524 : Butirosin and neomycin biosynthesis /// 01100 : Metabolic pathways /// 04910 : Insulin signaling pathway /// 04930 : Type II diabetes mellitus /// 04973 : Carbohydrate digesti…	GO:0005739 - mitochondrion /// GO:0005829 - cytosol /// GO:0016020 - membrane /// GO:0005739 - mitochondrion /// GO:0005741 - mitochondrial outer membrane	GO:0004396 - hexokinase activity /// GO:0004396 - hexokinase activity /// GO:0004340 - glucokinase activity /// GO:0008865 - fructokinase activity /// GO:0019158 - mannokinase activity /// GO:0000166 - nucleotide binding /// GO:0003824 - catalytic activity /// GO:0016301 - kinase activity /// GO:0016740 - transferase activity /// GO:0016773 - phosphotransferase activity, alcohol group as acceptor…	GO:0006006 - glucose metabolic process /// GO:0046324 - regulation of glucose import /// GO:0046835 - carbohydrate phosphorylation /// GO:0008637 - apoptotic mitochondrial changes /// GO:0001678 - cellular glucose homeostasis /// GO:0006096 - glycolytic process /// GO:0046835 - carbohydrate phosphorylation /// GO:0051156 - glucose 6-phosphate metabolic process /// GO:0008152 - metabolic process /…	5466	33	5466	8.18703	0.0482622	8.00414	8.10449	8.40674	0.368942	0.32068	2	8.6993	0.0059566	0.00603278	165.761	8	0.0368942	1	0.869187	26.918	0.000187893	3.72609	8.17179	0.209565	-0.799981	-0.321136	1.12112	-0.100349	-0.402595	-0.302246	-1.70238	-6.82985	-5.5383	0.124054	8.99845e-05	0.000408258
13511_at	Dsg2	desmoglein 2	Mm.345891	ENSMUSG00000044393	NA	18	20558116	13511	NM_007883 /// NP_031909	05412 : Arrhythmogenic right ventricular cardiomyopathy (ARVC)	GO:0030057 - desmosome /// GO:0016021 - integral component of membrane /// GO:0016020 - membrane /// GO:0030054 - cell junction /// GO:0005886 - plasma membrane /// GO:0009986 - cell surface /// GO:0016324 - apical plasma membrane /// GO:0016328 - lateral plasma membrane /// GO:0070062 - extracellular vesicular exosome	GO:0005509 - calcium ion binding /// GO:0046872 - metal ion binding	GO:0007156 - homophilic cell adhesion /// GO:0007155 - cell adhesion /// GO:0086005 - ventricular cardiac muscle cell action potential /// GO:0086069 - bundle of His cell to Purkinje myocyte communication /// GO:0086091 - regulation of heart rate by cardiac conduction	4599	29	4599	7.05082	0.0921136	6.8286	6.91797	7.35034	0.669712	0.577598	2	8.6993	0.0109974	0.0115142	86.8492	8	0.0669712	1	0.862458	26.2607	0.000206085	3.68595	7.0323	0.279031	-0.730043	-0.409755	1.1398	-0.0893703	-0.521743	-0.432373	-1.11581	-6.51409	-5.83081	0.294376	0.000127765	0.000284472
14958_at	H1f0	H1 histone family, member 0	Mm.24350	ENSMUSG00000096210	NA	15	79028212	14958	NM_008197 /// NP_032223	---	GO:0005634 - nucleus /// GO:0000786 - nucleosome /// GO:0005694 - chromosome /// GO:0000790 - nuclear chromatin /// GO:0005634 - nucleus /// GO:0005719 - nuclear euchromatin /// GO:0005794 - Golgi apparatus /// GO:0015629 - actin cytoskeleton	GO:0003677 - DNA binding /// GO:0031490 - chromatin DNA binding /// GO:0044822 - poly(A) RNA binding	GO:0006334 - nucleosome assembly	5356	21	5356	7.7478	0.0359708	7.54042	7.6272	8.02393	0.528147	0.492177	2	8.6993	0.00454368	0.00449635	222.403	8	0.0528147	1	0.931892	54.1606	1.23087e-05	4.90979	7.73052	0.257778	-0.737424	-0.400803	1.13823	-0.0867735	-0.483502	-0.396729	-1.68549	-9.39153	-8.32347	0.127342	7.63577e-06	1.98346e-05
100317_at	AU040320	expressed sequence AU040320	Mm.206206	ENSMUSG00000028830	NA	4	126753555; 126753770; 126753770	100317	NM_001035525 /// NM_001035526 /// NM_133886 /// NP_001030602 /// NP_001030603 /// NP_598647 /// XM_006502624 /// XM_006502625 /// XM_006502626 /// XM_006502627 /// XM_006502628 /// XM_006502629 /// XP_006502687 /// XP_006502688 /// XP_006502689 /// XP_006502690 /// XP_006502691 /// XP_006502692	---	GO:0016021 - integral component of membrane /// GO:0016020 - membrane /// GO:0031410 - cytoplasmic vesicle /// GO:0070062 - extracellular vesicular exosome	GO:0003674 - molecular_function	GO:0008150 - biological_process	932	27	932	6.21158	0.0261646	6.07102	6.14282	6.38574	0.225674	0.199509	2	8.6993	0.00341643	0.00327057	305.757	8	0.0225674	1	0.88406	29.1985	0.000138334	3.85907	6.19986	0.164931	-0.781173	-0.345842	1.12701	-0.0717995	-0.314719	-0.24292	-1.60834	-7.04983	-5.87749	0.143388	7.09672e-05	0.000268821
66191_at	Ier3ip1	immediate early response 3 interacting p	Mm.28593	ENSMUSG00000090000	NA	18	76930027	66191	NM_025409 /// NP_079685 /// XM_006526435 /// XP_006526498	---	GO:0016021 - integral component of membrane /// GO:0016020 - membrane /// GO:0005783 - endoplasmic reticulum /// GO:0005794 - Golgi apparatus	GO:0003674 - molecular_function	GO:2000269 - regulation of fibroblast apoptotic process	18367	18	18367	7.2962	0.0371684	7.36698	7.43286	7.10645	0.270931	0.233762	2	8.6993	0.00468135	0.00464605	215.236	8	0.0270931	1	0.862812	24.9674	0.000248652	3.60441	7.3021	0.17261	0.375902	0.757577	-1.13348	-0.065881	0.260535	0.326416	-1.26071	4.98566	6.74685	0.240174	0.000834465	9.85583e-05
330544_at	C230091D08Rik	RIKEN cDNA C230091D08 gene	Mm.9002; Mm.474161	NA	NA	7	-59307924	330544	NR_015479	---	GO:0005575 - cellular_component	GO:0003674 - molecular_function	GO:0008150 - biological_process	14746	23	14746	2.30075	0.0315307	2.35991	2.42126	2.13586	0.208874	0.177343	2	8.6993	0.00403328	0.00394134	253.721	8	0.0208874	1	0.849044	21.985	0.000396513	3.40174	2.30568	0.15023	0.360973	0.769394	-1.13037	-0.061357	0.224043	0.2854	-1.26496	4.61896	6.35536	0.238719	0.00137376	0.000153072
66631_at	Hiatl1	hippocampus abundant transcript-like 1	Mm.239196	ENSMUSG00000038212	NA	13	-65065030	66631	NM_001083901 /// NM_133680 /// NP_001077370 /// NP_598441 /// XM_006517323 /// XP_006517386	---	GO:0005575 - cellular_component /// GO:0005886 - plasma membrane /// GO:0016021 - integral component of membrane /// GO:0016020 - membrane	GO:0005215 - transporter activity	GO:0006810 - transport /// GO:0055085 - transmembrane transport	18746	25	18748	5.61921	0.0329617	5.71638	5.75244	5.41309	0.30224	0.269278	2	8.6993	0.00419777	0.00412021	242.706	8	0.030224	1	0.890942	32.074	9.67346e-05	4.01442	5.6273	0.186392	0.477914	0.671372	-1.14929	-0.0360588	0.303297	0.339355	-0.728692	6.12914	7.40731	0.485343	0.000199109	4.88017e-05
225288_at	Fhod3	formin homology 2 domain containing 3	Mm.329322	ENSMUSG00000034295	NA	18	24709445	225288	NM_001289654 /// NM_001289655 /// NM_175276 /// NP_001276583 /// NP_001276584 /// NP_780485 /// XM_006525826 /// XM_006525827 /// XM_006525828 /// XM_006525829 /// XM_006525830 /// XP_006525889 /// XP_006525890 /// XP_006525891 /// XP_006525892 /// XP_006525893	---	GO:0030017 - sarcomere /// GO:0005737 - cytoplasm /// GO:0005856 - cytoskeleton /// GO:0005865 - striated muscle thin filament	GO:0003674 - molecular_function /// GO:0003779 - actin binding	GO:0030837 - negative regulation of actin filament polymerization /// GO:0051639 - actin filament network formation /// GO:0055003 - cardiac myofibril assembly /// GO:0045214 - sarcomere organization /// GO:0007015 - actin filament organization /// GO:0045214 - sarcomere organization	9893	24	9893	7.70342	0.0734953	7.53397	7.56909	7.96484	0.505178	0.431683	2	8.6993	0.00885718	0.00918691	108.851	8	0.0505178	1	0.854516	24.3691	0.000271984	3.56546	7.6893	0.239271	-0.649182	-0.502405	1.15159	-0.0351193	-0.430871	-0.395752	-0.488584	-5.99434	-5.9469	0.637216	0.000233606	0.000247257
54216_at	Pcdh7	protocadherin 7	Mm.332387; Mm.397491	ENSMUSG00000029108	NA	5	57718021; 57718021	54216	NM_001122758 /// NM_018764 /// NP_001116230 /// NP_061234 /// XM_006504019 /// XM_006504020 /// XM_006504021 /// XM_006504022 /// XM_006504023 /// XM_006504024 /// XM_006504025 /// XM_006504026 /// XM_006504027 /// XM_006504028 /// XM_006504029 /// XM_006504030 /// XP_006504082 /// XP_006504083 /// XP_006504084 /// XP_006504085 /// XP_006504086 /// XP_006504087 /// XP_006504088 /// XP_006504089 /…	---	GO:0005887 - integral component of plasma membrane /// GO:0016021 - integral component of membrane /// GO:0016020 - membrane	GO:0005515 - protein binding	GO:0008150 - biological_process /// GO:0007155 - cell adhesion	16480	26	16480	7.50333	0.0407708	7.36313	7.38208	7.72974	0.363582	0.322811	2	8.6993	0.00509544	0.00509635	196.219	8	0.0363582	1	0.887863	31.6764	0.000101464	3.99369	7.49165	0.206406	-0.622639	-0.530845	1.15348	-0.0189468	-0.366603	-0.347656	-0.347525	-6.72429	-6.8877	0.736456	0.00010104	8.44933e-05
77337_at	Akr1c21	aldo-keto reductase family 1, member C21	Mm.27085	ENSMUSG00000021207	NA	13	4574075	77337	NM_029901 /// NP_084177	---	GO:0005737 - cytoplasm /// GO:0005829 - cytosol /// GO:0070062 - extracellular vesicular exosome	GO:0033764 - steroid dehydrogenase activity, acting on the CH-OH group of donors, NAD or NADP as acceptor /// GO:0047023 - androsterone dehydrogenase activity /// GO:0000252 - C-3 sterol dehydrogenase (C-4 sterol decarboxylase) activity /// GO:0004448 - isocitrate dehydrogenase activity /// GO:0004495 - mevaldate reductase activity /// GO:0016491 - oxidoreductase activity /// GO:0008875 - glucona…	GO:0006629 - lipid metabolic process /// GO:0008202 - steroid metabolic process /// GO:0007186 - G-protein coupled receptor signaling pathway /// GO:0055114 - oxidation-reduction process /// GO:0006694 - steroid biosynthetic process	23930	20	23930	2.05031	0.0724109	1.88939	1.89929	2.32202	0.536631	0.46422	2	8.6993	0.00873252	0.00905136	110.481	8	0.0536631	1	0.865064	26.58	0.00019699	3.70556	2.0369	0.246971	-0.597282	-0.557186	1.15447	-0.00990249	-0.432632	-0.422729	-0.138745	-6.06164	-6.39746	0.89281	0.000215631	0.000145864
17281_at	Fyco1	FYVE and coiled-coil domain containing 1	Mm.252941	ENSMUSG00000025241	NA	9	-123789510; -123789510	17281	NM_001110253 /// NM_148925 /// NP_001103723 /// NP_683727	---	GO:0016021 - integral component of membrane /// GO:0005768 - endosome /// GO:0031410 - cytoplasmic vesicle /// GO:0016020 - membrane /// GO:0005764 - lysosome /// GO:0005770 - late endosome /// GO:0005776 - autophagic vacuole	GO:0046872 - metal ion binding	GO:0006810 - transport /// GO:0072383 - plus-end-directed vesicle transport along microtubule	6436	34	6436	8.93577	0.0534241	8.81072	8.81299	9.15234	0.348251	0.294827	2	8.6993	0.00654996	0.00667801	149.745	8	0.0348251	1	0.846593	22.506	0.00036412	3.43875	8.92535	0.196584	-0.583099	-0.571583	1.15468	-0.00226385	-0.341619	-0.339355	-0.0366243	-5.52668	-5.92994	0.971611	0.000414257	0.000252344
15982_at	Ifrd1	interferon-related developmental regulat	Mm.168	ENSMUSG00000001627	NA	12	-40203129	15982	NM_013562 /// NP_038590	---	GO:0005634 - nucleus	---	GO:0007527 - adult somatic muscle development /// GO:0042692 - muscle cell differentiation /// GO:0007275 - multicellular organismal development /// GO:0030154 - cell differentiation	5650	25	5650	7.75542	0.0735849	8.00784	8.00659	7.31494	1.29317	1.21959	2	8.6993	0.00886749	0.00919812	108.718	8	0.129317	1	0.943097	68.7672	4.66904e-06	5.33077	7.77646	0.399686	0.578914	0.575785	-1.1547	0.0012503	0.692901	0.69165	0.0173842	9.63413	10.3873	0.986522	6.22545e-06	3.39201e-06
52538_at	Acaa2	acetyl-Coenzyme A acyltransferase 2 (mit	Mm.245724	ENSMUSG00000036880	2.3.1.16	18	74779212	52538	NM_177470 /// NP_803421	00062 : Fatty acid elongation in mitochondria /// 00071 : Fatty acid metabolism /// 00280 : Valine, leucine and isoleucine degradation /// 01100 : Metabolic pathways	GO:0005739 - mitochondrion /// GO:0005743 - mitochondrial inner membrane /// GO:0005739 - mitochondrion /// GO:0005759 - mitochondrial matrix /// GO:0070062 - extracellular vesicular exosome	GO:0003824 - catalytic activity /// GO:0016740 - transferase activity /// GO:0016746 - transferase activity, transferring acyl groups /// GO:0016747 - transferase activity, transferring acyl groups other than amino-acyl groups /// GO:0003988 - acetyl-CoA C-acyltransferase activity /// GO:0044822 - poly(A) RNA binding	GO:0008152 - metabolic process /// GO:0006629 - lipid metabolic process /// GO:0006631 - fatty acid metabolic process /// GO:0006084 - acetyl-CoA metabolic process /// GO:0006635 - fatty acid beta-oxidation /// GO:0071456 - cellular response to hypoxia /// GO:1901029 - negative regulation of mitochondrial outer membrane permeabilization involved in apoptotic signaling pathway /// GO:1902109 - neg…	16265	26	16265	10.4162	0.0148983	10.3594	10.3433	10.5317	0.0992619	0.0843636	2	8.6993	0.00212135	0.00186229	536.974	8	0.00992619	1	0.849909	19.8844	0.000569229	3.24471	10.4115	0.104477	-0.498517	-0.652745	1.15126	0.0161133	-0.172363	-0.188477	0.458056	-4.89982	-5.78716	0.658138	0.000936116	0.000300008
75646_at	Rai14	retinoic acid induced 14	Mm.212395	ENSMUSG00000022246	NA	15	-10568978; -10568978	75646	NM_001166408 /// NM_030690 /// NP_001159880 /// NP_109615 /// XM_006520187 /// XM_006520188 /// XM_006520189 /// XM_006520190 /// XM_006520191 /// XM_006520192 /// XP_006520250 /// XP_006520251 /// XP_006520252 /// XP_006520253 /// XP_006520254 /// XP_006520255	---	GO:0005739 - mitochondrion /// GO:0005856 - cytoskeleton /// GO:0005634 - nucleus /// GO:0005737 - cytoplasm /// GO:0015629 - actin cytoskeleton	---	---	23385	32	23385	5.23642	0.0707819	5.42025	5.40015	4.93481	0.643248	0.572467	2	8.6993	0.00854527	0.00884773	113.023	8	0.0643248	1	0.889962	33.4961	8.18899e-05	4.08677	5.25174	0.274646	0.613558	0.540369	-1.15393	0.0201009	0.485433	0.465332	0.284705	6.87556	7.11894	0.782531	8.56144e-05	6.59404e-05
12296_at	Cacnb2	calcium channel, voltage-dependent, beta	Mm.313930	ENSMUSG00000057914	NA	2	14604306; 14824092; 14873656	12296	NM_001252533 /// NM_023116 /// NP_001239462 /// NP_075605 /// NR_045533 /// XM_006497313 /// XM_006497314 /// XM_006497315 /// XM_006497316 /// XM_006497317 /// XM_006497318 /// XM_006497319 /// XM_006497320 /// XM_006497321 /// XM_006497322 /// XM_006497323 /// XP_006497376 /// XP_006497377 /// XP_006497378 /// XP_006497379 /// XP_006497380 /// XP_006497381 /// XP_006497382 /// XP_006497383 /// …	04010 : MAPK signaling pathway /// 04260 : Cardiac muscle contraction /// 05410 : Hypertrophic cardiomyopathy (HCM) /// 05412 : Arrhythmogenic right ventricular cardiomyopathy (ARVC) /// 05414 : Dilated cardiomyopathy	GO:0005891 - voltage-gated calcium channel complex /// GO:0005886 - plasma membrane /// GO:0016020 - membrane /// GO:0005891 - voltage-gated calcium channel complex	GO:0008331 - high voltage-gated calcium channel activity /// GO:0005515 - protein binding /// GO:0005244 - voltage-gated ion channel activity /// GO:0005262 - calcium channel activity /// GO:0005245 - voltage-gated calcium channel activity /// GO:0005246 - calcium channel regulator activity /// GO:0008331 - high voltage-gated calcium channel activity /// GO:0019901 - protein kinase binding /// GO…	GO:0007268 - synaptic transmission /// GO:0007601 - visual perception /// GO:0006810 - transport /// GO:0006811 - ion transport /// GO:0006816 - calcium ion transport /// GO:0034765 - regulation of ion transmembrane transport /// GO:0051928 - positive regulation of calcium ion transport /// GO:0070509 - calcium ion import /// GO:0070588 - calcium ion transmembrane transport	3930	14	3930	8.59215	0.0473344	8.48177	8.4502	8.81689	0.36653	0.319196	2	8.6993	0.00584994	0.00591679	169.01	8	0.036653	1	0.870858	27.282	0.000178669	3.74795	8.58295	0.203213	-0.497915	-0.653296	1.15121	0.0315755	-0.335124	-0.366699	0.540526	-5.73682	-6.78031	0.602396	0.000319086	9.49989e-05
13476_at	Reep5	receptor accessory protein 5	Mm.280075	ENSMUSG00000005873	NA	18	-34344886	13476	NM_007874 /// NP_031900 /// XR_385972	---	GO:0016021 - integral component of membrane /// GO:0016020 - membrane /// GO:0070062 - extracellular vesicular exosome	GO:0005515 - protein binding	GO:0008150 - biological_process	4575	22	4575	8.65811	0.0236386	8.60446	8.55713	8.79932	0.152818	0.12918	2	8.6993	0.00312607	0.00295483	338.429	8	0.0152818	1	0.845316	20.6617	0.000496189	3.30435	8.65364	0.128364	-0.383079	-0.751826	1.1349	0.0473337	-0.194854	-0.242188	1.10844	-4.56301	-6.12586	0.297374	0.0014849	0.00019988
110821_at	Pcca	propionyl-Coenzyme A carboxylase, alpha	Mm.23876	ENSMUSG00000041650	6.4.1.3	14	122534328	110821	NM_144844 /// NP_659093 /// XM_006518430 /// XM_006518431 /// XM_006518432 /// XM_006518433 /// XP_006518493 /// XP_006518494 /// XP_006518495 /// XP_006518496 /// XR_383133	00280 : Valine, leucine and isoleucine degradation /// 00630 : Glyoxylate and dicarboxylate metabolism /// 00640 : Propanoate metabolism /// 01100 : Metabolic pathways	GO:0005739 - mitochondrion /// GO:0005739 - mitochondrion	GO:0004658 - propionyl-CoA carboxylase activity /// GO:0000166 - nucleotide binding /// GO:0003824 - catalytic activity /// GO:0004075 - biotin carboxylase activity /// GO:0046872 - metal ion binding /// GO:0005524 - ATP binding /// GO:0016874 - ligase activity /// GO:0019899 - enzyme binding	GO:0008152 - metabolic process	3254	22	3254	8.70815	0.0308412	8.64015	8.58301	8.88428	0.231438	0.200597	2	8.6993	0.00395402	0.00385515	259.393	8	0.0231438	1	0.866741	25.3662	0.000234459	3.62993	8.70248	0.160014	-0.389513	-0.746631	1.13614	0.0571437	-0.244126	-0.30127	1.18985	-5.08319	-6.77565	0.265565	0.000733244	9.54859e-05
108654_at	Fam210a	family with sequence similarity 210, mem	Mm.125857	ENSMUSG00000038121	NA	18	-68260185	108654	NM_153794 /// NP_722489 /// XM_006525524 /// XP_006525587	---	GO:0005739 - mitochondrion /// GO:0016021 - integral component of membrane /// GO:0016020 - membrane	GO:0003674 - molecular_function	GO:0008150 - biological_process	3002	23	3002	7.46809	0.0288111	7.44354	7.35278	7.60181	0.155323	0.126512	2	8.6993	0.00372065	0.00360139	277.671	8	0.0155323	1	0.814508	17.0013	0.000987541	3.00545	7.46604	0.126028	-0.178574	-0.898682	1.07726	0.0907537	-0.15827	-0.249023	1.94803	-3.39727	-5.77359	0.0843427	0.0083078	0.000305028
20191_at	Ryr2	ryanodine receptor 2, cardiac	Mm.239871	ENSMUSG00000021313	NA	13	-11553103	20191	NM_023868 /// NP_076357 /// XM_006516610 /// XM_006516611 /// XM_006516612 /// XM_006516613 /// XM_006516614 /// XM_006516615 /// XP_006516673 /// XP_006516674 /// XP_006516675 /// XP_006516676 /// XP_006516677 /// XP_006516678 /// XR_382063	04020 : Calcium signaling pathway /// 04260 : Cardiac muscle contraction /// 04972 : Pancreatic secretion /// 05410 : Hypertrophic cardiomyopathy (HCM) /// 05412 : Arrhythmogenic right ventricular cardiomyopathy (ARVC) /// 05414 : Dilated cardiomyopathy	GO:0016020 - membrane /// GO:0005790 - smooth endoplasmic reticulum /// GO:0016529 - sarcoplasmic reticulum /// GO:0030017 - sarcomere /// GO:0030018 - Z disc /// GO:0033017 - sarcoplasmic reticulum membrane /// GO:0034704 - calcium channel complex /// GO:0005829 - cytosol /// GO:0005623 - cell /// GO:0005622 - intracellular /// GO:0016021 - integral component of membrane /// GO:0005886 - plasma …	GO:0005218 - intracellular ligand-gated calcium channel activity /// GO:0005219 - ryanodine-sensitive calcium-release channel activity /// GO:0005262 - calcium channel activity /// GO:0005516 - calmodulin binding /// GO:0043621 - protein self-association /// GO:0005515 - protein binding /// GO:0005488 - binding /// GO:0019899 - enzyme binding /// GO:0019901 - protein kinase binding /// GO:0005509…	GO:0001666 - response to hypoxia /// GO:0006816 - calcium ion transport /// GO:0014808 - release of sequestered calcium ion into cytosol by sarcoplasmic reticulum /// GO:0030509 - BMP signaling pathway /// GO:0031000 - response to caffeine /// GO:0060070 - canonical Wnt signaling pathway /// GO:0070588 - calcium ion transmembrane transport /// GO:0071313 - cellular response to caffeine /// GO:000…	7731	77	7731	9.90843	0.165923	9.7619	9.66309	10.2637	0.975901	0.809978	2	8.6993	0.0194819	0.0207403	48.2153	8	0.0975901	1	0.82998	20.788	0.000485433	3.31387	9.89622	0.322037	-0.417101	-0.72393	1.14103	0.0988104	-0.501776	-0.600586	0.926892	-4.70691	-6.0852	0.37898	0.00121677	0.000209701
66365_at	Ccdc90b	coiled-coil domain containing 90B	Mm.21173	ENSMUSG00000030613	NA	7	92561149	66365	NM_001162918 /// NM_025515 /// NP_001156390 /// NP_079791 /// XM_006508116 /// XP_006508179	---	GO:0005739 - mitochondrion /// GO:0016021 - integral component of membrane /// GO:0016020 - membrane /// GO:0005739 - mitochondrion	GO:0003674 - molecular_function	GO:0008150 - biological_process	18491	30	18491	6.3592	0.0561056	6.30078	6.19971	6.5625	0.333419	0.277314	2	8.6993	0.00685821	0.0070132	142.588	8	0.0333419	1	0.831727	20.2177	0.000536394	3.27052	6.35433	0.18723	-0.286001	-0.82584	1.11184	0.101074	-0.261719	-0.362793	1.598	-4.13782	-6.19539	0.145672	0.00272209	0.000184231
74166_at	Tmem38a	transmembrane protein 38A	Mm.212927	ENSMUSG00000031791	NA	8	72572103	74166	NM_144534 /// NP_653117 /// XM_006509771 /// XM_006509772 /// XM_006509773 /// XP_006509834 /// XP_006509835 /// XP_006509836	---	GO:0016021 - integral component of membrane /// GO:0016020 - membrane /// GO:0005634 - nucleus /// GO:0016529 - sarcoplasmic reticulum /// GO:0070062 - extracellular vesicular exosome	GO:0015269 - calcium-activated potassium channel activity /// GO:0005261 - cation channel activity /// GO:0005267 - potassium channel activity	GO:0071805 - potassium ion transmembrane transport /// GO:0006810 - transport /// GO:0006811 - ion transport /// GO:0006813 - potassium ion transport /// GO:0015672 - monovalent inorganic cation transport	22699	21	22699	9.69268	0.0570563	9.62512	9.52197	9.91406	0.383355	0.326299	2	8.6993	0.00696749	0.00713203	140.213	8	0.0383355	1	0.851166	23.4158	0.000315001	3.50169	9.68705	0.20325	-0.304713	-0.812196	1.11691	0.103146	-0.288944	-0.39209	1.61791	-4.53229	-6.64297	0.141302	0.00155	0.000110574
27402_at	Pdhx	pyruvate dehydrogenase complex, componen	Mm.315011	ENSMUSG00000010914	NA	2	-103021057	27402	NM_175094 /// NP_780303	01100 : Metabolic pathways	GO:0005739 - mitochondrion	GO:0016746 - transferase activity, transferring acyl groups	GO:0008152 - metabolic process	13671	22	13671	8.77702	0.0518996	8.70064	8.59375	9.01758	0.435226	0.383326	2	8.6993	0.00637472	0.00648745	154.144	8	0.0435226	1	0.880753	30.0661	0.000123793	3.90731	8.77066	0.220418	-0.317653	-0.80259	1.12024	0.106889	-0.316939	-0.423828	1.75285	-5.1974	-7.50713	0.114693	0.000631295	4.40632e-05
11938_at	Atp2a2	ATPase, Ca++ transporting, cardiac muscl	Mm.227583	ENSMUSG00000029467	3.6.3.8	5	-122453513; -122456324	11938	NM_001110140 /// NM_009722 /// NP_001103610 /// NP_033852 /// NR_027838	04020 : Calcium signaling pathway /// 04260 : Cardiac muscle contraction /// 04972 : Pancreatic secretion /// 05010 : Alzheimer's disease /// 05410 : Hypertrophic cardiomyopathy (HCM) /// 05412 : Arrhythmogenic right ventricular cardiomyopathy (ARVC) /// 05414 : Dilated cardiomyopathy	GO:0016529 - sarcoplasmic reticulum /// GO:0016020 - membrane /// GO:0005783 - endoplasmic reticulum /// GO:0016529 - sarcoplasmic reticulum /// GO:0005623 - cell /// GO:0016021 - integral component of membrane /// GO:0016020 - membrane /// GO:0005789 - endoplasmic reticulum membrane /// GO:0012506 - vesicle membrane /// GO:0016529 - sarcoplasmic reticulum /// GO:0031234 - extrinsic component of …	GO:0005388 - calcium-transporting ATPase activity /// GO:0005515 - protein binding /// GO:0008022 - protein C-terminus binding /// GO:0019899 - enzyme binding /// GO:0000166 - nucleotide binding /// GO:0019829 - cation-transporting ATPase activity /// GO:0046872 - metal ion binding /// GO:0016787 - hydrolase activity /// GO:0005509 - calcium ion binding /// GO:0005388 - calcium-transporting ATPas…	GO:0006937 - regulation of muscle contraction /// GO:0006200 - ATP catabolic process /// GO:0006874 - cellular calcium ion homeostasis /// GO:0070588 - calcium ion transmembrane transport /// GO:0006874 - cellular calcium ion homeostasis /// GO:0006984 - ER-nucleus signaling pathway /// GO:0002026 - regulation of the force of heart contraction /// GO:0006874 - cellular calcium ion homeostasis ///…	3760	33	3760	12.6891	0.0426849	12.6405	12.5264	12.8882	0.314234	0.271549	2	8.6993	0.00531547	0.00533561	187.42	8	0.0314234	1	0.864162	25.5432	0.00022848	3.64115	12.685	0.18497	-0.240648	-0.857718	1.09837	0.114139	-0.247677	-0.361816	2.04978	-4.44791	-7.01831	0.0717151	0.00174508	7.33988e-05
71268_at	Lrrfip2	leucine rich repeat (in FLII) interactin	Mm.302287	ENSMUSG00000032497	NA	9	111118111	71268	NM_001164838 /// NM_027742 /// NP_001158310 /// NP_082018 /// XM_006512264 /// XM_006512265 /// XM_006512266 /// XM_006512267 /// XM_006512268 /// XM_006512269 /// XM_006512270 /// XM_006512271 /// XM_006512272 /// XM_006512273 /// XM_006512274 /// XM_006512275 /// XM_006512276 /// XM_006512277 /// XM_006512278 /// XM_006512279 /// XM_006512280 /// XM_006512281 /// XM_006512282 /// XM_006512283 /…	---	---	---	GO:0016055 - Wnt signaling pathway	21340	30	21340	7.54578	0.0289577	7.51583	7.40161	7.7124	0.225839	0.196881	2	8.6993	0.00373751	0.00361972	276.265	8	0.0225839	1	0.871777	26.3385	0.000203821	3.69075	7.54328	0.157203	-0.174613	-0.901194	1.07581	0.114221	-0.19657	-0.310791	2.44622	-4.20986	-7.18939	0.0378608	0.0024519	6.12147e-05
231440_at	Parm1	prostate androgen-regulated mucin-like p	Mm.5002	ENSMUSG00000034981	NA	5	91517700	231440	NM_145562 /// NP_663537	---	GO:0016021 - integral component of membrane /// GO:0016020 - membrane /// GO:0005768 - endosome /// GO:0005886 - plasma membrane /// GO:0005769 - early endosome /// GO:0005770 - late endosome /// GO:0005794 - Golgi apparatus	GO:0003674 - molecular_function	GO:0051973 - positive regulation of telomerase activity	10600	17	10600	8.22668	0.0697802	8.42264	8.30713	7.99927	0.41774	0.34796	2	8.6993	0.00843013	0.00872252	114.646	8	0.041774	1	0.832958	20.6379	0.000498248	3.30255	8.24301	0.218849	0.820796	0.292965	-1.11376	0.115516	0.423377	0.307861	1.64727	6.03742	4.74191	0.135074	0.000221919	0.00115978
18555_at	Cdk16	cyclin-dependent kinase 16	Mm.102574; Mm.392081	ENSMUSG00000031065	NA	X	20688493	18555	NM_011049 /// NP_035179 /// XM_006527568 /// XM_006527569 /// XM_006527570 /// XP_006527631 /// XP_006527632 /// XP_006527633	---	GO:0008021 - synaptic vesicle /// GO:0005623 - cell /// GO:0043005 - neuron projection /// GO:0030054 - cell junction /// GO:0031410 - cytoplasmic vesicle /// GO:0045202 - synapse /// GO:0005886 - plasma membrane /// GO:0005737 - cytoplasm /// GO:0008021 - synaptic vesicle /// GO:0015630 - microtubule cytoskeleton /// GO:0031234 - extrinsic component of cytoplasmic side of plasma membrane	GO:0004674 - protein serine/threonine kinase activity /// GO:0000166 - nucleotide binding /// GO:0004672 - protein kinase activity /// GO:0004693 - cyclin-dependent protein serine/threonine kinase activity /// GO:0005524 - ATP binding /// GO:0016301 - kinase activity /// GO:0016740 - transferase activity /// GO:0016772 - transferase activity, transferring phosphorus-containing groups /// GO:00046…	GO:0006468 - protein phosphorylation /// GO:0006887 - exocytosis /// GO:0007283 - spermatogenesis /// GO:0030252 - growth hormone secretion /// GO:0031175 - neuron projection development /// GO:0061178 - regulation of insulin secretion involved in cellular response to glucose stimulus /// GO:0016310 - phosphorylation /// GO:0030154 - cell differentiation /// GO:0061178 - regulation of insulin sec…	6967	24	6967	8.4073	0.0588397	8.34825	8.229	8.62988	0.394632	0.335792	2	8.6993	0.0071725	0.00735497	135.963	8	0.0394632	1	0.8509	23.4083	0.000315373	3.50118	8.40238	0.205848	-0.262961	-0.842243	1.1052	0.119244	-0.281635	-0.400879	1.8435	-4.35404	-6.69411	0.0995057	0.00199355	0.000104469
219189_at	Vwa8	von Willebrand factor A domain containin	Mm.159651	ENSMUSG00000058997	NA	14	78849178; 78849178	219189	NM_027906 /// NM_173758 /// NP_082182 /// NP_776119 /// XM_006518903 /// XM_006518904 /// XP_006518966 /// XP_006518967	---	GO:0005739 - mitochondrion /// GO:0005576 - extracellular region	GO:0003674 - molecular_function /// GO:0000166 - nucleotide binding /// GO:0005524 - ATP binding /// GO:0016887 - ATPase activity	GO:0008150 - biological_process	9392	43	9392	7.77595	0.0418658	7.73056	7.60986	7.97607	0.318585	0.276719	2	8.6993	0.00522132	0.00523323	191.087	8	0.0318585	1	0.868588	26.499	0.000199249	3.7006	7.77217	0.186617	-0.222956	-0.869704	1.09266	0.120694	-0.245517	-0.366211	2.18695	-4.44869	-7.16731	0.0575446	0.00174316	6.26545e-05
19357_at	Rad21	RAD21 homolog (S. pombe)	Mm.182628	ENSMUSG00000022314	NA	15	-51962604	19357	NM_009009 /// NP_033035 /// XM_006520644 /// XM_006520645 /// XP_006520707 /// XP_006520708	04110 : Cell cycle	GO:0000785 - chromatin /// GO:0008278 - cohesin complex /// GO:0034991 - nuclear meiotic cohesin complex /// GO:0000228 - nuclear chromosome /// GO:0000775 - chromosome, centromeric region /// GO:0005694 - chromosome /// GO:0016020 - membrane /// GO:0005634 - nucleus	GO:0005515 - protein binding	GO:0007059 - chromosome segregation /// GO:0006915 - apoptotic process /// GO:0006281 - DNA repair /// GO:0006974 - cellular response to DNA damage stimulus /// GO:0007049 - cell cycle /// GO:0007067 - mitotic nuclear division /// GO:0051301 - cell division /// GO:0006357 - regulation of transcription from RNA polymerase II promoter /// GO:0071168 - protein localization to chromatin	7481	25	7481	8.22156	0.0252098	8.22449	8.10352	8.3374	0.134651	0.109441	2	8.6993	0.00330668	0.00315122	317.337	8	0.0134651	1	0.812777	16.5486	0.00108403	2.96496	8.2218	0.116967	0.022981	-1.01129	0.988311	0.120975	-0.112911	-0.233887	2.7545	-2.57089	-5.75208	0.0230145	0.0309489	0.000313168
16456_at	F11r	F11 receptor	Mm.294882	ENSMUSG00000038235	NA	1	171437561	16456	NM_172647 /// NP_766235	04514 : Cell adhesion molecules (CAMs) /// 04530 : Tight junction /// 04670 : Leukocyte transendothelial migration	GO:0005923 - tight junction /// GO:0016021 - integral component of membrane /// GO:0016020 - membrane /// GO:0005886 - plasma membrane /// GO:0005911 - cell-cell junction /// GO:0015630 - microtubule cytoskeleton /// GO:0030054 - cell junction /// GO:0031410 - cytoplasmic vesicle /// GO:0036057 - slit diaphragm /// GO:0070062 - extracellular vesicular exosome	GO:0005515 - protein binding	GO:0007155 - cell adhesion /// GO:0030855 - epithelial cell differentiation /// GO:0016032 - viral process /// GO:0045777 - positive regulation of blood pressure	5804	32	5804	7.44652	0.0700304	7.35795	7.2356	7.72388	0.579226	0.509195	2	8.6993	0.00845889	0.0087538	114.236	8	0.0579226	1	0.879097	30.0982	0.000123292	3.90907	7.43914	0.254063	-0.319557	-0.801165	1.12072	0.122359	-0.365922	-0.488281	1.74189	-5.20924	-7.50807	0.116669	0.000621647	4.40212e-05
72278_at	Ccpg1	cell cycle progression 1	Mm.268475	ENSMUSG00000034563	NA	9	72985551; 72985551	72278	NM_001114328 /// NM_001286544 /// NM_001286545 /// NM_001286546 /// NM_028181 /// NP_001107800 /// NP_001273473 /// NP_001273474 /// NP_001273475 /// NP_082457 /// XM_006511467 /// XM_006511468 /// XM_006511469 /// XM_006511470 /// XM_006511471 /// XP_006511530 /// XP_006511531 /// XP_006511532 /// XP_006511533 /// XP_006511534 /// XR_379460	---	GO:0016020 - membrane /// GO:0016021 - integral component of membrane	GO:0005515 - protein binding	GO:2001106 - regulation of Rho guanyl-nucleotide exchange factor activity /// GO:0045944 - positive regulation of transcription from RNA polymerase II promoter /// GO:0007049 - cell cycle /// GO:0008284 - positive regulation of cell proliferation /// GO:0045787 - positive regulation of cell cycle	21822	33	21822	7.5602	0.0116997	7.56546	7.44165	7.6748	0.120536	0.108836	2	8.6993	0.00175367	0.00146246	683.778	8	0.0120536	1	0.902936	31.0309	0.000109766	3.95953	7.56064	0.116652	0.0413295	-1.02002	0.978695	0.123809	-0.109345	-0.233154	3.87097	-3.41876	-7.8738	0.00403494	0.00803518	3.05431e-05
232164_at	Paip2b	poly(A) binding protein interacting prot	Mm.404420	ENSMUSG00000045896	NA	6	-83806059	232164	NM_146169 /// NP_666281 /// XM_006505970 /// XM_006505971 /// XP_006506033 /// XP_006506034	---	GO:0005575 - cellular_component	GO:0000900 - translation repressor activity, nucleic acid binding /// GO:0008143 - poly(A) binding	GO:0017148 - negative regulation of translation /// GO:0045947 - negative regulation of translational initiation	10686	12	10686	4.66394	0.0746621	4.59786	4.46948	4.90796	0.477196	0.402534	2	8.6993	0.00899131	0.00933276	107.149	8	0.0477196	1	0.84354	22.3846	0.000371367	3.4302	4.65843	0.225427	-0.268697	-0.8382	1.1069	0.128381	-0.310096	-0.438477	1.77268	-4.28179	-6.53958	0.111197	0.00221055	0.000124145
246738_at	Dnajc28	DnaJ (Hsp40) homolog, subfamily C, membe	Mm.101927	ENSMUSG00000039763	NA	16	-91614257	246738	NM_001099738 /// NM_138664 /// NP_001093208 /// NP_619605 /// XM_006523034 /// XP_006523097 /// XR_384940	---	GO:0005575 - cellular_component	GO:0003674 - molecular_function	GO:0008150 - biological_process	12111	30	12111	5.56029	0.0512552	5.53421	5.39355	5.74658	0.303317	0.252062	2	8.6993	0.00630065	0.0064069	156.082	8	0.0303317	1	0.831018	20.0029	0.000557278	3.25393	5.55812	0.177724	-0.134512	-0.925935	1.06045	0.140655	-0.212373	-0.353027	2.32008	-3.50306	-6.28971	0.0464248	0.00705302	0.000165101
380928_at	Lmo7	LIM domain only 7	Mm.218981	ENSMUSG00000033060	NA	14	101729928	380928	NM_201529 /// NP_963287 /// XM_006519176 /// XM_006519177 /// XM_006519178 /// XM_006519179 /// XM_006519180 /// XM_006519181 /// XM_006519182 /// XM_006519183 /// XM_006519184 /// XM_006519185 /// XM_006519186 /// XM_006519187 /// XM_006519188 /// XM_006519189 /// XM_006519190 /// XM_006519191 /// XM_006519192 /// XP_006519239 /// XP_006519240 /// XP_006519241 /// XP_006519242 /// XP_006519243 /…	04520 : Adherens junction	GO:0005913 - cell-cell adherens junction /// GO:0005925 - focal adhesion /// GO:0016324 - apical plasma membrane	GO:0046872 - metal ion binding /// GO:0008022 - protein C-terminus binding /// GO:0042805 - actinin binding	GO:0016337 - single organismal cell-cell adhesion	15017	26	15017	8.14728	0.030143	8.14678	8.00537	8.28955	0.19166	0.161517	2	8.6993	0.00387377	0.00376788	265.401	8	0.019166	1	0.842727	20.8476	0.000480462	3.31834	8.14723	0.14209	-0.00319343	-0.998399	1.00159	0.141409	-0.14277	-0.28418	2.97476	-3.0034	-6.45716	0.0161681	0.0154466	0.000136272
18746_at	Pkm	pyruvate kinase, muscle	Mm.326167; Mm.488724	ENSMUSG00000032294	2.7.1.40	9	59656368	18746	NM_001253883 /// NM_011099 /// NP_001240812 /// NP_035229 /// XM_006510848 /// XM_006510849 /// XM_006510850 /// XM_006510851 /// XM_006510852 /// XM_006510853 /// XM_006510854 /// XM_006510855 /// XM_006510856 /// XP_006510911 /// XP_006510912 /// XP_006510913 /// XP_006510914 /// XP_006510915 /// XP_006510916 /// XP_006510917 /// XP_006510918 /// XP_006510919	00010 : Glycolysis / Gluconeogenesis /// 00230 : Purine metabolism /// 00620 : Pyruvate metabolism /// 01100 : Metabolic pathways /// 04930 : Type II diabetes mellitus	GO:0005739 - mitochondrion /// GO:0005929 - cilium /// GO:0005886 - plasma membrane /// GO:0005739 - mitochondrion /// GO:0005634 - nucleus /// GO:0005737 - cytoplasm /// GO:0031012 - extracellular matrix /// GO:0031982 - vesicle /// GO:0070062 - extracellular vesicular exosome	GO:0004743 - pyruvate kinase activity /// GO:0005515 - protein binding /// GO:0000166 - nucleotide binding /// GO:0000287 - magnesium ion binding /// GO:0003824 - catalytic activity /// GO:0046872 - metal ion binding /// GO:0005524 - ATP binding /// GO:0016301 - kinase activity /// GO:0016740 - transferase activity /// GO:0030955 - potassium ion binding /// GO:0004743 - pyruvate kinase activity /…	GO:0006096 - glycolytic process /// GO:0016310 - phosphorylation /// GO:0008152 - metabolic process /// GO:0001889 - liver development /// GO:0006006 - glucose metabolic process /// GO:0006096 - glycolytic process /// GO:0006754 - ATP biosynthetic process /// GO:0012501 - programmed cell death /// GO:0031100 - organ regeneration /// GO:0042866 - pyruvate biosynthetic process /// GO:0043403 - skel…	7075	11	7075	9.57553	0.0654296	9.48331	9.3418	9.87842	0.676433	0.611003	2	8.6993	0.00793002	0.00817871	122.269	8	0.0676433	1	0.903272	38.5247	4.75955e-05	4.32243	9.56784	0.278118	-0.303942	-0.812764	1.11671	0.141513	-0.395108	-0.536621	2.08065	-5.80926	-8.52208	0.0682565	0.000292031	1.64882e-05
20496_at	Slc12a2	solute carrier family 12, member 2	Mm.399997	ENSMUSG00000024597	NA	18	57878678	20496	NM_009194 /// NP_033220 /// XM_006525732 /// XP_006525795 /// XR_385981	04970 : Salivary secretion /// 04972 : Pancreatic secretion	GO:0016323 - basolateral plasma membrane /// GO:0016324 - apical plasma membrane /// GO:0016021 - integral component of membrane /// GO:0016020 - membrane /// GO:0005886 - plasma membrane /// GO:0031982 - vesicle /// GO:0070062 - extracellular vesicular exosome	GO:0005515 - protein binding /// GO:0005215 - transporter activity /// GO:0015293 - symporter activity /// GO:0015377 - cation:chloride symporter activity /// GO:0008511 - sodium:potassium:chloride symporter activity /// GO:0008519 - ammonium transmembrane transporter activity	GO:0035264 - multicellular organism growth /// GO:0050910 - detection of mechanical stimulus involved in sensory perception of sound /// GO:0060444 - branching involved in mammary gland duct morphogenesis /// GO:0060763 - mammary duct terminal end bud growth /// GO:0006810 - transport /// GO:0006811 - ion transport /// GO:0055085 - transmembrane transport /// GO:0006813 - potassium ion transport …	7930	25	7930	7.30884	0.0491747	7.26	7.11426	7.54004	0.421591	0.372416	2	8.6993	0.00606149	0.00614684	162.685	8	0.0421591	1	0.883359	30.7199	0.000114064	3.94285	7.30477	0.216392	-0.206866	-0.880389	1.08725	0.145745	-0.280037	-0.425781	2.451	-4.70941	-7.73414	0.037569	0.0012126	3.50633e-05
13194_at	Ddb1	damage specific DNA binding protein 1	Mm.289915; Mm.466856	ENSMUSG00000024740	NA	19	10605625	13194	NM_015735 /// NP_056550 /// XM_006526639 /// XP_006526702	03420 : Nucleotide excision repair /// 04120 : Ubiquitin mediated proteolysis	GO:0005615 - extracellular space /// GO:0005634 - nucleus /// GO:0005737 - cytoplasm /// GO:0031464 - Cul4A-RING E3 ubiquitin ligase complex /// GO:0031465 - Cul4B-RING E3 ubiquitin ligase complex /// GO:0070062 - extracellular vesicular exosome /// GO:0080008 - Cul4-RING E3 ubiquitin ligase complex	GO:0003676 - nucleic acid binding /// GO:0003677 - DNA binding /// GO:0003684 - damaged DNA binding	GO:0016055 - Wnt signaling pathway /// GO:0043066 - negative regulation of apoptotic process /// GO:0006281 - DNA repair /// GO:0006974 - cellular response to DNA damage stimulus /// GO:0042787 - protein ubiquitination involved in ubiquitin-dependent protein catabolic process /// GO:0035518 - histone H2A monoubiquitination /// GO:0043161 - proteasome-mediated ubiquitin-dependent protein catabolic…	4498	27	4498	8.11524	0.0142379	8.11657	7.9668	8.2627	0.189357	0.175119	2	8.6993	0.00204544	0.00177974	561.881	8	0.0189357	1	0.924809	42.8072	3.14572e-05	4.50228	8.11535	0.147953	0.00820061	-1.00408	0.995874	0.149769	-0.146129	-0.295898	4.33581	-4.23044	-9.25261	0.00204605	0.00238011	8.60008e-06
23992_at	Prkra	protein kinase, interferon inducible dou	Mm.277250	ENSMUSG00000002731	NA	2	-76629937	23992	NM_011871 /// NP_036001	---	GO:0005622 - intracellular /// GO:0016020 - membrane /// GO:0005737 - cytoplasm	GO:0005515 - protein binding /// GO:0003723 - RNA binding /// GO:0019901 - protein kinase binding /// GO:0042803 - protein homodimerization activity /// GO:0044822 - poly(A) RNA binding	GO:0006468 - protein phosphorylation /// GO:0034599 - cellular response to oxidative stress /// GO:2001244 - positive regulation of intrinsic apoptotic signaling pathway /// GO:0042473 - outer ear morphogenesis /// GO:0042474 - middle ear morphogenesis /// GO:0048705 - skeletal system morphogenesis /// GO:0031047 - gene silencing by RNA /// GO:0008284 - positive regulation of cell proliferation /…	11466	25	11466	5.76232	0.0298092	5.77302	5.62207	5.89453	0.178752	0.148943	2	8.6993	0.00383539	0.00372616	268.373	8	0.0178752	1	0.833237	19.4169	0.000619559	3.20792	5.76321	0.136495	0.0719068	-1.03401	0.962106	0.150953	-0.121508	-0.272461	3.19138	-2.56887	-6.22177	0.011467	0.0310502	0.000178646
67273_at	Ndufa10	NADH dehydrogenase (ubiquinone) 1 alpha	Mm.248778	ENSMUSG00000026260	1.6.99.3 /// 1.6.5.3	1	-92439719	67273	NM_024197 /// NP_077159	00190 : Oxidative phosphorylation /// 01100 : Metabolic pathways /// 05010 : Alzheimer's disease /// 05012 : Parkinson's disease /// 05016 : Huntington's disease	GO:0005739 - mitochondrion /// GO:0070469 - respiratory chain /// GO:0005747 - mitochondrial respiratory chain complex I	GO:0003674 - molecular_function /// GO:0005524 - ATP binding /// GO:0019206 - nucleoside kinase activity	GO:0008150 - biological_process /// GO:0055114 - oxidation-reduction process /// GO:0006139 - nucleobase-containing compound metabolic process /// GO:0006810 - transport	19387	17	19387	11.1601	0.0303208	11.1722	11.0195	11.2915	0.178868	0.148548	2	8.6993	0.00389419	0.00379009	263.846	8	0.0178868	1	0.830486	19.073	0.000660112	3.18038	11.1611	0.136328	0.081727	-1.03836	0.956629	0.152699	-0.119274	-0.271973	3.20382	-2.50252	-6.16356	0.0112443	0.0345658	0.000191222
70503_at	Ddo	D-aspartate oxidase	Mm.252862	ENSMUSG00000063428	1.4.3.1	10	40630011	70503	NM_027442 /// NP_081718 /// XM_006512842 /// XM_006512843 /// XM_006512844 /// XM_006512845 /// XM_006512846 /// XM_006512847 /// XM_006512848 /// XM_006512849 /// XP_006512905 /// XP_006512906 /// XP_006512907 /// XP_006512908 /// XP_006512909 /// XP_006512910 /// XP_006512911 /// XP_006512912	00250 : Alanine, aspartate and glutamate metabolism /// 04146 : Peroxisome	GO:0005777 - peroxisome	GO:0008445 - D-aspartate oxidase activity /// GO:0048037 - cofactor binding /// GO:0003884 - D-amino-acid oxidase activity /// GO:0016491 - oxidoreductase activity /// GO:0016641 - oxidoreductase activity, acting on the CH-NH2 group of donors, oxygen as acceptor /// GO:0005102 - receptor binding /// GO:0008445 - D-aspartate oxidase activity /// GO:0048037 - cofactor binding	GO:0055114 - oxidation-reduction process /// GO:0019478 - D-amino acid catabolic process /// GO:0006531 - aspartate metabolic process /// GO:0007320 - insemination /// GO:0007625 - grooming behavior /// GO:0042445 - hormone metabolic process /// GO:0055114 - oxidation-reduction process /// GO:0006533 - aspartate catabolic process /// GO:0019478 - D-amino acid catabolic process	21045	23	21045	5.75679	0.0604273	5.9562	5.79639	5.56763	0.329126	0.268698	2	8.6993	0.00735499	0.00755341	132.39	8	0.0329126	1	0.816401	18.2664	0.000768802	3.11419	5.77341	0.195305	0.93596	0.117669	-1.05363	0.159816	0.388576	0.22876	2.43989	5.93234	3.77228	0.0382503	0.000251617	0.00467886
15107_at	Hadh	hydroxyacyl-Coenzyme A dehydrogenase	Mm.260164	ENSMUSG00000027984	1.1.1.35	3	-131233424	15107	NM_008212 /// NP_032238 /// XM_006501026 /// XP_006501089	00062 : Fatty acid elongation in mitochondria /// 00071 : Fatty acid metabolism /// 00280 : Valine, leucine and isoleucine degradation /// 00310 : Lysine degradation /// 00380 : Tryptophan metabolism /// 00650 : Butanoate metabolism /// 01100 : Metabolic pathways	GO:0005739 - mitochondrion /// GO:0005743 - mitochondrial inner membrane /// GO:0005739 - mitochondrion /// GO:0005634 - nucleus /// GO:0005737 - cytoplasm	GO:0003857 - 3-hydroxyacyl-CoA dehydrogenase activity /// GO:0016491 - oxidoreductase activity /// GO:0016616 - oxidoreductase activity, acting on the CH-OH group of donors, NAD or NADP as acceptor /// GO:0050662 - coenzyme binding /// GO:0070403 - NAD+ binding /// GO:0003857 - 3-hydroxyacyl-CoA dehydrogenase activity	GO:0055114 - oxidation-reduction process /// GO:0006629 - lipid metabolic process /// GO:0006631 - fatty acid metabolic process /// GO:0006635 - fatty acid beta-oxidation /// GO:0042493 - response to drug /// GO:0014823 - response to activity /// GO:0046676 - negative regulation of insulin secretion	5392	21	5392	11.3772	0.0346192	11.3551	11.1938	11.5771	0.330472	0.295853	2	8.6993	0.00438831	0.0043274	231.086	8	0.0330472	1	0.895243	33.7093	7.99137e-05	4.09738	11.3754	0.192452	-0.105254	-0.94321	1.04846	0.161266	-0.222035	-0.383301	3.18739	-4.38848	-8.18288	0.0115392	0.00189825	2.26551e-05
14245_at	Lpin1	lipin 1	Mm.153625	ENSMUSG00000020593	NA	12	-16535669	14245	NM_001130412 /// NM_015763 /// NM_172950 /// NP_001123884 /// NP_056578 /// NP_766538 /// XM_006514975 /// XM_006514976 /// XM_006514977 /// XM_006514978 /// XM_006514979 /// XM_006514980 /// XM_006514981 /// XM_006514982 /// XM_006514983 /// XM_006514984 /// XM_006514985 /// XM_006514986 /// XM_006514987 /// XM_006514988 /// XP_006515038 /// XP_006515039 /// XP_006515040 /// XP_006515041 /// XP_…	---	GO:0005634 - nucleus /// GO:0005737 - cytoplasm /// GO:0005667 - transcription factor complex /// GO:0005741 - mitochondrial outer membrane /// GO:0031965 - nuclear membrane /// GO:0016020 - membrane /// GO:0005739 - mitochondrion /// GO:0005783 - endoplasmic reticulum	GO:0001085 - RNA polymerase II transcription factor binding /// GO:0003713 - transcription coactivator activity /// GO:0008195 - phosphatidate phosphatase activity /// GO:0042826 - histone deacetylase binding /// GO:0005515 - protein binding /// GO:0042975 - peroxisome proliferator activated receptor binding /// GO:0016787 - hydrolase activity	GO:0000266 - mitochondrial fission /// GO:0006642 - triglyceride mobilization /// GO:0009062 - fatty acid catabolic process /// GO:0016311 - dephosphorylation /// GO:0045944 - positive regulation of transcription from RNA polymerase II promoter /// GO:0006629 - lipid metabolic process /// GO:0031065 - positive regulation of histone deacetylation /// GO:0031529 - ruffle organization /// GO:0031532…	4969	36	4969	7.98916	0.032325	7.95961	7.79834	8.20215	0.362051	0.329726	2	8.6993	0.00412459	0.00404063	247.486	8	0.0362051	1	0.910717	39.9708	4.12004e-05	4.3851	7.9867	0.203263	-0.133287	-0.926672	1.05996	0.161266	-0.242543	-0.403809	3.28771	-4.94469	-8.89202	0.00985628	0.000881399	1.17936e-05
67914_at	Coq9	coenzyme Q9 homolog (yeast)	Mm.169234	ENSMUSG00000031782	NA	8	94838417	67914	NM_026452 /// NP_080728	---	GO:0005739 - mitochondrion /// GO:0005739 - mitochondrion	GO:0003674 - molecular_function	GO:0006120 - mitochondrial electron transport, NADH to ubiquinone /// GO:0006744 - ubiquinone biosynthetic process	19843	18	19843	10.0707	0.0355317	10.0827	9.9209	10.2114	0.204939	0.169408	2	8.6993	0.0044932	0.00444146	225.151	8	0.0204939	1	0.826623	18.8516	0.000687952	3.16244	10.0717	0.145576	0.0756541	-1.03568	0.960024	0.161784	-0.128743	-0.290527	3.16009	-2.51472	-6.12949	0.0120472	0.0338908	0.000199029
14467_at	Gbas	glioblastoma amplified sequence	Mm.12468	ENSMUSG00000029432	NA	5	129725075	14467	NM_008095 /// NP_032121 /// XM_006504279 /// XP_006504342 /// XR_377051 /// XR_377052 /// XR_377053 /// XR_377054	---	GO:0005739 - mitochondrion /// GO:0005739 - mitochondrion	GO:0003674 - molecular_function	GO:0006119 - oxidative phosphorylation /// GO:0006754 - ATP biosynthetic process /// GO:2000984 - negative regulation of ATP citrate synthase activity	5101	23	5101	9.95324	0.0159979	9.96851	9.80469	10.0903	0.180146	0.164148	2	8.6993	0.00224775	0.00199973	500.066	8	0.0180146	1	0.911195	36.5138	5.86554e-05	4.23169	9.95451	0.143336	0.0976887	-1.04526	0.947571	0.163826	-0.121819	-0.285645	4.52428	-3.3642	-8.52053	0.00156746	0.00874643	1.65118e-05
28030_at	Gfm1	G elongation factor, mitochondrial 1	Mm.122466	ENSMUSG00000027774	NA	3	67430115	28030	NM_138591 /// NP_613057	---	GO:0005739 - mitochondrion /// GO:0005622 - intracellular /// GO:0005739 - mitochondrion	GO:0000166 - nucleotide binding /// GO:0005525 - GTP binding /// GO:0003924 - GTPase activity /// GO:0003746 - translation elongation factor activity /// GO:0044822 - poly(A) RNA binding	GO:0006412 - translation /// GO:0006414 - translational elongation /// GO:0006184 - GTP catabolic process /// GO:0070125 - mitochondrial translational elongation	13793	30	13793	8.55475	0.0604751	8.54451	8.37793	8.73926	0.322024	0.261549	2	8.6993	0.00736049	0.00755938	132.286	8	0.0322024	1	0.812203	17.7671	0.0008472	3.07201	8.5539	0.180847	-0.0519267	-0.973025	1.02495	0.166578	-0.19475	-0.361328	2.54218	-2.97212	-5.95612	0.0324191	0.0162365	0.000244536
77559_at	Agl	amylo-1,6-glucosidase, 4-alpha-glucanotr	Mm.237099	ENSMUSG00000033400	3.2.1.33 /// 2.4.1.25	3	-116739999	77559	NM_001081326 /// NP_001074795 /// XM_006502287 /// XP_006502350	00500 : Starch and sucrose metabolism /// 01100 : Metabolic pathways	GO:0005634 - nucleus /// GO:0005737 - cytoplasm /// GO:0016234 - inclusion body /// GO:0005634 - nucleus /// GO:0005737 - cytoplasm /// GO:0016529 - sarcoplasmic reticulum	GO:0004133 - glycogen debranching enzyme activity /// GO:0030247 - polysaccharide binding /// GO:0031593 - polyubiquitin binding /// GO:0030247 - polysaccharide binding /// GO:0031593 - polyubiquitin binding /// GO:0005515 - protein binding /// GO:0004134 - 4-alpha-glucanotransferase activity /// GO:0004135 - amylo-alpha-1,6-glucosidase activity /// GO:0004134 - 4-alpha-glucanotransferase activit…	GO:0005977 - glycogen metabolic process /// GO:0005980 - glycogen catabolic process /// GO:0005980 - glycogen catabolic process /// GO:0007584 - response to nutrient /// GO:0009725 - response to hormone /// GO:0051384 - response to glucocorticoid	23962	28	23962	8.22826	0.0737583	8.182	8.01221	8.479	0.518385	0.444627	2	8.6993	0.00888741	0.00921978	108.462	8	0.0518385	1	0.857715	25.0144	0.000246926	3.60743	8.2244	0.23627	-0.179483	-0.898104	1.07759	0.169789	-0.297008	-0.466797	2.3581	-4.12498	-7.00253	0.0436583	0.00277346	7.46495e-05
56451_at	Suclg1	succinate-CoA ligase, GDP-forming, alpha	Mm.29845	ENSMUSG00000052738	6.2.1.5 /// 6.2.1.4	6	73248505	56451	NM_019879 /// NP_063932	00020 : Citrate cycle (TCA cycle) /// 00640 : Propanoate metabolism /// 01100 : Metabolic pathways	GO:0005739 - mitochondrion /// GO:0005743 - mitochondrial inner membrane /// GO:0005739 - mitochondrion /// GO:0043234 - protein complex /// GO:0045244 - succinate-CoA ligase complex (GDP-forming) /// GO:0070062 - extracellular vesicular exosome	GO:0000166 - nucleotide binding /// GO:0003824 - catalytic activity /// GO:0003878 - ATP citrate synthase activity /// GO:0005525 - GTP binding /// GO:0016874 - ligase activity /// GO:0048037 - cofactor binding /// GO:0004775 - succinate-CoA ligase (ADP-forming) activity /// GO:0004776 - succinate-CoA ligase (GDP-forming) activity /// GO:0019003 - GDP binding /// GO:0044822 - poly(A) RNA binding …	GO:0008152 - metabolic process /// GO:0006099 - tricarboxylic acid cycle /// GO:0006104 - succinyl-CoA metabolic process /// GO:0006105 - succinate metabolic process	17037	19	17037	9.266	0.0343774	9.26959	9.09961	9.42969	0.252334	0.217956	2	8.6993	0.00436051	0.00429717	232.711	8	0.0252334	1	0.863762	24.9921	0.000247744	3.606	9.2663	0.165064	0.01996	-1.00983	0.989871	0.169981	-0.160097	-0.330078	3.37034	-3.17436	-7.06908	0.00866319	0.0117788	6.95257e-05
107508_at	Eprs	glutamyl-prolyl-tRNA synthetase	Mm.154511; Mm.490980	ENSMUSG00000026615	6.1.1.15 /// 6.1.1.17	1	185363095	107508	NM_029735 /// NP_084011 /// XM_006497117 /// XM_006497118 /// XP_006497180 /// XP_006497181	00860 : Porphyrin and chlorophyll metabolism /// 00970 : Aminoacyl-tRNA biosynthesis /// 01100 : Metabolic pathways	GO:0017101 - aminoacyl-tRNA synthetase multienzyme complex /// GO:0097452 - GAIT complex /// GO:0005737 - cytoplasm /// GO:0030529 - ribonucleoprotein complex /// GO:0016020 - membrane /// GO:0097452 - GAIT complex	GO:0000166 - nucleotide binding /// GO:0003723 - RNA binding /// GO:0003824 - catalytic activity /// GO:0004812 - aminoacyl-tRNA ligase activity /// GO:0004818 - glutamate-tRNA ligase activity /// GO:0004827 - proline-tRNA ligase activity /// GO:0005524 - ATP binding /// GO:0016874 - ligase activity /// GO:0016876 - ligase activity, forming aminoacyl-tRNA and related compounds /// GO:0035613 - RN…	GO:0017148 - negative regulation of translation /// GO:0071346 - cellular response to interferon-gamma /// GO:0008152 - metabolic process /// GO:0006412 - translation /// GO:0006417 - regulation of translation /// GO:0006418 - tRNA aminoacylation for protein translation /// GO:0006424 - glutamyl-tRNA aminoacylation /// GO:0006433 - prolyl-tRNA aminoacylation /// GO:0043039 - tRNA aminoacylation /…	2879	31	2879	7.26684	0.0139672	7.29643	7.12451	7.38696	0.155342	0.141374	2	8.6993	0.00201433	0.00174591	572.769	8	0.0155342	1	0.910087	35.0922	6.84224e-05	4.1648	7.2693	0.133312	0.203501	-1.0861	0.882597	0.171919	-0.0905318	-0.262451	5.01535	-2.64106	-8.26986	0.000802133	0.0276328	2.08617e-05
13185_at	Dscr3	Down syndrome critical region gene 3	Mm.7472	ENSMUSG00000022898	NA	16	-94497724	13185	NM_007834 /// NP_031860	---	GO:0005634 - nucleus	---	---	4494	26	4494	6.4146	0.0904722	6.64358	6.46997	6.1875	0.466335	0.375863	2	8.6993	0.0108087	0.011309	88.425	8	0.0466335	1	0.805993	17.387	0.000913544	3.03927	6.43368	0.230197	0.911824	0.157629	-1.06945	0.173614	0.456084	0.282471	2.18644	5.74381	3.84239	0.0575911	0.00031636	0.00421111
11946_at	Atp5a1	ATP synthase, H+ transporting, mitochond	Mm.276137	ENSMUSG00000025428	3.6.3.14	18	77773768	11946	NM_007505 /// NP_031531	00190 : Oxidative phosphorylation /// 01100 : Metabolic pathways /// 05010 : Alzheimer's disease /// 05012 : Parkinson's disease /// 05016 : Huntington's disease	GO:0005739 - mitochondrion /// GO:0005743 - mitochondrial inner membrane /// GO:0033178 - proton-transporting two-sector ATPase complex, catalytic domain /// GO:0005886 - plasma membrane /// GO:0000275 - mitochondrial proton-transporting ATP synthase complex, catalytic core F(1) /// GO:0016020 - membrane /// GO:0005739 - mitochondrion /// GO:0005743 - mitochondrial inner membrane /// GO:0005753 -…	GO:0046933 - proton-transporting ATP synthase activity, rotational mechanism /// GO:0005524 - ATP binding /// GO:0000166 - nucleotide binding /// GO:0046961 - proton-transporting ATPase activity, rotational mechanism /// GO:0016820 - hydrolase activity, acting on acid anhydrides, catalyzing transmembrane movement of substances /// GO:0005524 - ATP binding /// GO:0016887 - ATPase activity /// GO:0…	GO:0006200 - ATP catabolic process /// GO:0006629 - lipid metabolic process /// GO:0009790 - embryo development /// GO:1902600 - hydrogen ion transmembrane transport /// GO:0006754 - ATP biosynthetic process /// GO:0006810 - transport /// GO:0006811 - ion transport /// GO:0015992 - proton transport /// GO:0015986 - ATP synthesis coupled proton transport /// GO:0015991 - ATP hydrolysis coupled pro…	3764	22	3764	12.4055	0.0182376	12.445	12.2695	12.5117	0.142002	0.123764	2	8.6993	0.00250521	0.00227969	438.655	8	0.0142002	1	0.871568	24.7014	0.000258708	3.58719	12.4088	0.125099	0.289858	-1.11291	0.823052	0.175485	-0.0667022	-0.242188	4.59051	-1.74486	-6.84297	0.00142912	0.116131	8.87052e-05
12896_at	Cpt2	carnitine palmitoyltransferase 2	Mm.307620	ENSMUSG00000028607	2.3.1.21	4	-107903982	12896	NM_009949 /// NP_034079	00071 : Fatty acid metabolism /// 03320 : PPAR signaling pathway	GO:0005739 - mitochondrion /// GO:0016020 - membrane /// GO:0005743 - mitochondrial inner membrane /// GO:0005739 - mitochondrion /// GO:0005634 - nucleus	GO:0016740 - transferase activity /// GO:0016746 - transferase activity, transferring acyl groups /// GO:0004095 - carnitine O-palmitoyltransferase activity	GO:0006629 - lipid metabolic process /// GO:0006631 - fatty acid metabolic process /// GO:0006810 - transport	4314	29	4314	8.90073	0.0334792	8.90424	8.72461	9.07422	0.277983	0.244504	2	8.6993	0.00425726	0.0041849	238.954	8	0.0277983	1	0.879564	28.7161	0.000147328	3.83171	8.90102	0.174827	0.0183939	-1.00907	0.990676	0.179628	-0.169981	-0.349609	3.60455	-3.41096	-7.57762	0.00603547	0.00813296	4.10225e-05
28028_at	Mrpl50	mitochondrial ribosomal protein L50	Mm.30052	ENSMUSG00000044018	NA	4	-49512597	28028	NM_178603 /// NP_848718	---	GO:0005739 - mitochondrion /// GO:0030529 - ribonucleoprotein complex /// GO:0005840 - ribosome	GO:0003674 - molecular_function	GO:0008150 - biological_process	13791	23	13792	8.13961	0.0153033	8.19809	8.01514	8.22021	0.113527	0.0982242	2	8.6993	0.00216791	0.00191291	522.763	8	0.0113527	1	0.865202	22.6541	0.000355516	3.44914	8.14448	0.112561	0.476296	-1.14911	0.672817	0.182958	-0.0221206	-0.205078	5.14483	-0.62204	-6.22893	0.000676174	0.549869	0.000177163
67874_at	Rprm	reprimo, TP53 dependent G2 arrest mediat	Mm.27086	ENSMUSG00000075334	NA	2	-54084093	67874	NM_023396 /// NP_075885	04115 : p53 signaling pathway	GO:0005737 - cytoplasm /// GO:0016021 - integral component of membrane /// GO:0016020 - membrane	GO:0003674 - molecular_function	GO:0007050 - cell cycle arrest /// GO:0007346 - regulation of mitotic cell cycle	19813	22	19813	4.28949	0.0287878	4.33068	4.14478	4.40332	0.169477	0.14069	2	8.6993	0.00371797	0.00359847	277.896	8	0.0169477	1	0.830138	18.9202	0.00067917	3.16802	4.29293	0.133344	0.283162	-1.11105	0.827885	0.185909	-0.0726355	-0.258545	3.99199	-1.55969	-5.9965	0.00337112	0.154426	0.000233004
72900_at	Ndufv2	NADH dehydrogenase (ubiquinone) flavopro	Mm.2206	ENSMUSG00000024099	1.6.99.3 /// 1.6.5.3	17	-66078795	72900	NM_001278415 /// NM_028388 /// NP_001265344 /// NP_082664	00190 : Oxidative phosphorylation /// 01100 : Metabolic pathways /// 05010 : Alzheimer's disease /// 05012 : Parkinson's disease /// 05016 : Huntington's disease	GO:0005739 - mitochondrion /// GO:0005747 - mitochondrial respiratory chain complex I /// GO:0016020 - membrane /// GO:0005743 - mitochondrial inner membrane /// GO:0070469 - respiratory chain /// GO:0005739 - mitochondrion /// GO:0005747 - mitochondrial respiratory chain complex I	GO:0009055 - electron carrier activity /// GO:0008137 - NADH dehydrogenase (ubiquinone) activity /// GO:0003954 - NADH dehydrogenase activity /// GO:0046872 - metal ion binding /// GO:0016491 - oxidoreductase activity /// GO:0051536 - iron-sulfur cluster binding /// GO:0051537 - 2 iron, 2 sulfur cluster binding /// GO:0008137 - NADH dehydrogenase (ubiquinone) activity	GO:0006120 - mitochondrial electron transport, NADH to ubiquinone /// GO:0055114 - oxidation-reduction process /// GO:0006810 - transport /// GO:0006120 - mitochondrial electron transport, NADH to ubiquinone /// GO:0007399 - nervous system development /// GO:0048738 - cardiac muscle tissue development	22184	24	22184	10.6308	0.0349197	10.6671	10.4766	10.7578	0.198567	0.163647	2	8.6993	0.00442285	0.00436496	229.097	8	0.0198567	1	0.824142	18.5002	0.000735165	3.13362	10.6338	0.143552	0.231984	-1.0956	0.863619	0.190578	-0.0906723	-0.28125	3.752	-1.78511	-5.98076	0.00482418	0.109056	0.000237427
11472_at	Actn2	actinin alpha 2	Mm.37638	ENSMUSG00000052374	NA	13	-12269427	11472	NM_033268 /// NP_150371 /// XM_006516533 /// XP_006516596	04510 : Focal adhesion /// 04520 : Adherens junction /// 04530 : Tight junction /// 04670 : Leukocyte transendothelial migration /// 04810 : Regulation of actin cytoskeleton /// 05146 : Amoebiasis /// 05322 : Systemic lupus erythematosus /// 05412 : Arrhythmogenic right ventricular cardiomyopathy (ARVC)	GO:0005865 - striated muscle thin filament /// GO:0030017 - sarcomere /// GO:0030018 - Z disc /// GO:0005737 - cytoplasm /// GO:0005925 - focal adhesion /// GO:0030018 - Z disc /// GO:0030175 - filopodium /// GO:0030864 - cortical actin cytoskeleton /// GO:0070062 - extracellular vesicular exosome	GO:0030674 - protein binding, bridging /// GO:0051015 - actin filament binding /// GO:0042803 - protein homodimerization activity /// GO:0051015 - actin filament binding /// GO:0008092 - cytoskeletal protein binding /// GO:0030374 - ligand-dependent nuclear receptor transcription coactivator activity /// GO:0030375 - thyroid hormone receptor coactivator activity /// GO:0005515 - protein binding /…	GO:0006936 - muscle contraction /// GO:2000273 - positive regulation of receptor activity /// GO:2001141 - regulation of RNA biosynthetic process /// GO:0043267 - negative regulation of potassium ion transport /// GO:0030035 - microspike assembly /// GO:0042391 - regulation of membrane potential /// GO:0043268 - positive regulation of potassium ion transport /// GO:0048041 - focal adhesion assemb…	3417	17	3417	11.4868	0.0518793	11.5082	11.3149	11.6426	0.268458	0.216579	2	8.6993	0.00637239	0.00648492	154.204	8	0.0268458	1	0.806751	16.9935	0.000989106	3.00476	11.4886	0.164696	0.119039	-1.05419	0.935152	0.193226	-0.134411	-0.327637	3.16925	-2.20457	-5.80439	0.0118742	0.0559347	0.000293769
54473_at	Tollip	toll interacting protein	Mm.103551	ENSMUSG00000025139	NA	7	-141881585	54473	NM_023764 /// NP_076253 /// XM_006508631 /// XP_006508694	04620 : Toll-like receptor signaling pathway	GO:0005737 - cytoplasm /// GO:0016604 - nuclear body /// GO:0048471 - perinuclear region of cytoplasm /// GO:0070062 - extracellular vesicular exosome	GO:0005515 - protein binding /// GO:0005150 - interleukin-1, Type I receptor binding /// GO:0019900 - kinase binding /// GO:0031624 - ubiquitin conjugating enzyme binding /// GO:0031625 - ubiquitin protein ligase binding /// GO:0032183 - SUMO binding /// GO:0035325 - Toll-like receptor binding	GO:0002376 - immune system process /// GO:0006954 - inflammatory response /// GO:0045087 - innate immune response /// GO:0007165 - signal transduction /// GO:0016310 - phosphorylation /// GO:0033235 - positive regulation of protein sumoylation /// GO:0036010 - protein localization to endosome	16543	13	16544	6.79675	0.0111779	6.88039	6.68677	6.84399	0.0894754	0.0782975	2	8.6993	0.00169369	0.00139724	715.696	8	0.00894754	1	0.875073	23.1144	0.000330315	3.48107	6.80372	0.102902	0.74508	-1.1365	0.391425	0.193618	0.0363917	-0.157227	6.15986	1.15778	-5.40286	0.000192053	0.27775	0.000484507
11745_at	Anxa3	annexin A3	Mm.7214	ENSMUSG00000029484	NA	5	96793385	11745	NM_013470 /// NP_038498 /// XM_006534734 /// XP_006534797	---	GO:0005886 - plasma membrane /// GO:0016020 - membrane /// GO:0005737 - cytoplasm /// GO:0030424 - axon /// GO:0030425 - dendrite /// GO:0030670 - phagocytic vesicle membrane /// GO:0042581 - specific granule /// GO:0043025 - neuronal cell body /// GO:0070062 - extracellular vesicular exosome	GO:0005509 - calcium ion binding /// GO:0004859 - phospholipase inhibitor activity /// GO:0005544 - calcium-dependent phospholipid binding /// GO:0019834 - phospholipase A2 inhibitor activity /// GO:0048306 - calcium-dependent protein binding	GO:0042742 - defense response to bacterium /// GO:0006909 - phagocytosis /// GO:0010595 - positive regulation of endothelial cell migration /// GO:0043086 - negative regulation of catalytic activity /// GO:0043312 - neutrophil degranulation /// GO:0045766 - positive regulation of angiogenesis /// GO:0051054 - positive regulation of DNA metabolic process /// GO:0051091 - positive regulation of seq…	3619	22	3619	7.38951	0.0272006	7.57437	7.37842	7.26196	0.195282	0.168081	2	8.6993	0.00353552	0.00340007	294.111	8	0.0195282	1	0.860711	23.7703	0.000298088	3.52566	7.40492	0.157879	1.0733	-0.167837	-0.905462	0.195949	0.312404	0.116455	4.31476	6.87909	2.76979	0.00210854	8.52866e-05	0.0224552
12293_at	Cacna2d1	calcium channel, voltage-dependent, alph	Mm.159842	ENSMUSG00000040118	NA	5	15934691	12293	NM_001110843 /// NM_001110844 /// NM_001110845 /// NM_001110846 /// NM_009784 /// NP_001104313 /// NP_001104314 /// NP_001104315 /// NP_001104316 /// NP_033914 /// XM_006535616 /// XM_006535617 /// XM_006535618 /// XM_006535619 /// XP_006535679 /// XP_006535680 /// XP_006535681 /// XP_006535682	04010 : MAPK signaling pathway /// 04260 : Cardiac muscle contraction /// 05410 : Hypertrophic cardiomyopathy (HCM) /// 05412 : Arrhythmogenic right ventricular cardiomyopathy (ARVC) /// 05414 : Dilated cardiomyopathy	GO:0016529 - sarcoplasmic reticulum /// GO:0030315 - T-tubule /// GO:0016021 - integral component of membrane /// GO:0016020 - membrane /// GO:0005891 - voltage-gated calcium channel complex /// GO:0070062 - extracellular vesicular exosome	GO:0005515 - protein binding /// GO:0005244 - voltage-gated ion channel activity /// GO:0005262 - calcium channel activity /// GO:0046872 - metal ion binding /// GO:0005245 - voltage-gated calcium channel activity	GO:0051924 - regulation of calcium ion transport /// GO:0006810 - transport /// GO:0006811 - ion transport /// GO:0006816 - calcium ion transport /// GO:0034765 - regulation of ion transmembrane transport /// GO:0051924 - regulation of calcium ion transport /// GO:0070588 - calcium ion transmembrane transport	3927	38	3927	7.98224	0.0485992	7.91078	7.70752	8.31055	0.796947	0.748348	2	8.6993	0.00599534	0.0060749	164.612	8	0.0796947	1	0.939018	62.4108	6.93477e-06	5.15897	7.97628	0.306804	-0.213503	-0.876006	1.08951	0.203258	-0.399769	-0.603027	3.43703	-6.75996	-11.014	0.00781078	9.71464e-05	2.1053e-06
67936_at	Wdr55	WD repeat domain 55	Mm.271719	ENSMUSG00000042660	NA	18	36760239	67936	NM_026464 /// NP_080740 /// XR_386010	---	GO:0005737 - cytoplasm /// GO:0005730 - nucleolus /// GO:0005634 - nucleus	GO:0003674 - molecular_function	GO:0006364 - rRNA processing	19859	18	19859	5.24198	0.0904641	5.49793	5.29395	4.99805	0.535808	0.445344	2	8.6993	0.0108078	0.011308	88.4329	8	0.0535808	1	0.831163	20.6029	0.000501289	3.29991	5.26331	0.251345	0.933463	0.121898	-1.05536	0.203983	0.499882	0.295898	2.56902	6.29565	4.02522	0.0310424	0.000163971	0.00320995
80517_at	Herpud2	HERPUD family member 2	Mm.142843	ENSMUSG00000008429	NA	9	-25108130	80517	NM_020586 /// NP_065611 /// XM_006510706 /// XP_006510769	---	GO:0005575 - cellular_component /// GO:0016021 - integral component of membrane /// GO:0016020 - membrane	GO:0003674 - molecular_function	GO:0008150 - biological_process /// GO:0006986 - response to unfolded protein	24448	25	24448	7.81195	0.00827566	7.88731	7.68311	7.88428	0.112642	0.104366	2	8.6993	0.00136007	0.00103446	966.69	8	0.0112642	1	0.926531	38.368	4.83596e-05	4.31552	7.81823	0.117032	0.590261	-1.1546	0.564343	0.204205	0.00303326	-0.201172	7.24983	0.107689	-7.71439	5.74567e-05	0.916685	3.57597e-05
100504141_at	Gm20083	predicted gene, 20083	Mm.130252	NA	NA	7	NA	100504141	XR_105118 /// XR_391609 /// XR_391610 /// XR_391611 /// XR_391612 /// XR_391613 /// XR_391614 /// XR_391615 /// XR_404247 /// XR_404248 /// XR_404249 /// XR_404250 /// XR_404251 /// XR_404252 /// XR_404253 /// XR_404254	---	-----	-----	-----	1220	23	1220	2.42957	0.0116893	2.57037	2.36243	2.39111	0.0951131	0.0834239	2	8.6993	0.00175247	0.00146116	684.389	8	0.00951131	1	0.877102	23.8018	0.000296641	3.52777	2.4413	0.112692	1.14531	-0.699933	-0.445377	0.207945	0.179258	-0.0286865	6.50376	5.60655	-0.969098	0.000129263	0.000374865	0.358666
226641_at	Atf6	activating transcription factor 6	Mm.377046	ENSMUSG00000026663	NA	1	-170704457	226641	NM_001081304 /// NP_001074773 /// XM_006496790 /// XM_006496791 /// XM_006496792 /// XP_006496853 /// XP_006496854 /// XP_006496855	04141 : Protein processing in endoplasmic reticulum /// 05010 : Alzheimer's disease	GO:0005634 - nucleus /// GO:0016021 - integral component of membrane /// GO:0016020 - membrane /// GO:0005783 - endoplasmic reticulum /// GO:0005634 - nucleus	GO:0005515 - protein binding /// GO:0003677 - DNA binding /// GO:0003700 - sequence-specific DNA binding transcription factor activity /// GO:0043565 - sequence-specific DNA binding	GO:0045944 - positive regulation of transcription from RNA polymerase II promoter /// GO:0006986 - response to unfolded protein /// GO:0006351 - transcription, DNA-templated /// GO:0006355 - regulation of transcription, DNA-templated	10059	26	10059	8.1064	0.0765476	8.09162	7.88354	8.34033	0.494757	0.41821	2	8.6993	0.00920805	0.00956845	104.51	8	0.0494757	1	0.845283	22.7089	0.000352393	3.45297	8.10517	0.228695	-0.0592323	-0.969067	1.0283	0.208074	-0.248713	-0.456787	2.83907	-3.39356	-6.73201	0.0200894	0.00835579	0.000100183
16832_at	Ldhb	lactate dehydrogenase B	Mm.9745	ENSMUSG00000030246	1.1.1.27	6	-142490249	16832	NM_008492 /// NP_032518 /// XM_006506920 /// XP_006506983	00010 : Glycolysis / Gluconeogenesis /// 00270 : Cysteine and methionine metabolism /// 00620 : Pyruvate metabolism /// 00640 : Propanoate metabolism /// 01100 : Metabolic pathways	GO:0005739 - mitochondrion /// GO:0016020 - membrane /// GO:0005737 - cytoplasm /// GO:0070062 - extracellular vesicular exosome	GO:0004459 - L-lactate dehydrogenase activity /// GO:0003824 - catalytic activity /// GO:0016491 - oxidoreductase activity /// GO:0016616 - oxidoreductase activity, acting on the CH-OH group of donors, NAD or NADP as acceptor /// GO:0004457 - lactate dehydrogenase activity /// GO:0004459 - L-lactate dehydrogenase activity /// GO:0042802 - identical protein binding /// GO:0019900 - kinase binding …	GO:0055114 - oxidation-reduction process /// GO:0019244 - lactate biosynthetic process from pyruvate /// GO:0005975 - carbohydrate metabolic process /// GO:0006096 - glycolytic process /// GO:0044262 - cellular carbohydrate metabolic process /// GO:0006089 - lactate metabolic process /// GO:0019674 - NAD metabolic process	6011	12	6011	10.0697	0.0753756	10.0792	9.87109	10.2612	0.380159	0.304784	2	8.6993	0.00907333	0.00942195	106.135	8	0.0380159	1	0.801726	16.7956	0.00103001	2.98716	10.0705	0.195213	0.0444923	-1.0215	0.977011	0.208097	-0.18204	-0.390137	2.86038	-2.50222	-5.79227	0.0194144	0.0345827	0.000298145
226646_at	Ndufs2	NADH dehydrogenase (ubiquinone) Fe-S pro	Mm.21669	ENSMUSG00000013593	1.6.99.3 /// 1.6.5.3	1	-171234860	226646	NM_153064 /// NP_694704 /// XM_006496793 /// XP_006496856	00190 : Oxidative phosphorylation /// 01100 : Metabolic pathways /// 05010 : Alzheimer's disease /// 05012 : Parkinson's disease /// 05016 : Huntington's disease	GO:0005739 - mitochondrion /// GO:0016020 - membrane /// GO:0005743 - mitochondrial inner membrane /// GO:0070469 - respiratory chain /// GO:0005739 - mitochondrion /// GO:0005634 - nucleus /// GO:0005747 - mitochondrial respiratory chain complex I	GO:0046872 - metal ion binding /// GO:0016491 - oxidoreductase activity /// GO:0008137 - NADH dehydrogenase (ubiquinone) activity /// GO:0016651 - oxidoreductase activity, acting on NAD(P)H /// GO:0048038 - quinone binding /// GO:0051287 - NAD binding /// GO:0051536 - iron-sulfur cluster binding /// GO:0051539 - 4 iron, 4 sulfur cluster binding /// GO:0003954 - NADH dehydrogenase activity	GO:0055114 - oxidation-reduction process /// GO:0006810 - transport /// GO:0006979 - response to oxidative stress	10060	19	10060	10.2016	0.0272542	10.21	10	10.397	0.342721	0.315466	2	8.6993	0.00354169	0.00340678	293.532	8	0.0342721	1	0.920477	44.5361	2.68968e-05	4.5703	10.2023	0.198599	0.0388166	-1.01884	0.980027	0.21005	-0.186923	-0.396973	4.62124	-4.11243	-9.43344	0.00136944	0.00282471	7.36874e-06
59054_at	Mrps30	mitochondrial ribosomal protein S30	Mm.143810	ENSMUSG00000021731	NA	13	-118380110	59054	NM_021556 /// NP_067531	---	GO:0005575 - cellular_component /// GO:0005739 - mitochondrion /// GO:0030529 - ribonucleoprotein complex /// GO:0005840 - ribosome	GO:0003735 - structural constituent of ribosome /// GO:0044822 - poly(A) RNA binding	GO:0008150 - biological_process /// GO:0006412 - translation	17481	27	17481	7.23384	0.0846628	7.2347	7.02173	7.44531	0.443513	0.35885	2	8.6993	0.0101409	0.0105829	94.4925	8	0.0443513	1	0.809108	17.6932	0.000859628	3.06569	7.23391	0.211793	0.00371436	-1.00185	0.998138	0.212972	-0.210612	-0.423584	2.76902	-2.73833	-5.94862	0.0224831	0.0236214	0.000246747
13001_at	Csnk2b	casein kinase 2, beta polypeptide	Mm.378901	ENSMUSG00000024387	NA	17	-35116195	13001	NM_009975 /// NP_034105 /// XM_006523575 /// XM_006523576 /// XM_006525297 /// XM_006525298 /// XM_006536511 /// XM_006536512 /// XM_006537244 /// XM_006537245 /// XP_006523638 /// XP_006523639 /// XP_006525360 /// XP_006525361 /// XP_006536574 /// XP_006536575 /// XP_006537307 /// XP_006537308	03008 : Ribosome biogenesis in eukaryotes /// 04310 : Wnt signaling pathway /// 04520 : Adherens junction /// 04530 : Tight junction	GO:0005956 - protein kinase CK2 complex /// GO:0005886 - plasma membrane /// GO:0005634 - nucleus /// GO:0005737 - cytoplasm /// GO:0031519 - PcG protein complex /// GO:0070062 - extracellular vesicular exosome	GO:0005515 - protein binding /// GO:0046872 - metal ion binding /// GO:0019887 - protein kinase regulator activity /// GO:0016301 - kinase activity /// GO:0016740 - transferase activity /// GO:0005102 - receptor binding /// GO:0008134 - transcription factor binding /// GO:0042802 - identical protein binding /// GO:0019904 - protein domain specific binding	GO:0016055 - Wnt signaling pathway /// GO:0016310 - phosphorylation /// GO:0010862 - positive regulation of pathway-restricted SMAD protein phosphorylation /// GO:0032927 - positive regulation of activin receptor signaling pathway /// GO:0033211 - adiponectin-activated signaling pathway /// GO:0043537 - negative regulation of blood vessel endothelial cell migration /// GO:0061154 - endothelial tu…	4384	24	4384	9.20448	0.0116735	9.27971	9.06592	9.28662	0.132439	0.120766	2	8.6993	0.00175066	0.00145919	685.314	8	0.0132439	1	0.911858	34.4915	7.31455e-05	4.13581	9.21075	0.125476	0.549597	-1.15426	0.604666	0.213793	-0.00690992	-0.220703	6.69014	-0.216229	-7.45973	0.00010493	0.833794	4.62472e-05
97212_at	Hadha	hydroxyacyl-Coenzyme A dehydrogenase/3-k	Mm.200497	ENSMUSG00000025745	1.1.1.211 /// 4.2.1.17	5	-30118304	97212	NM_178878 /// NP_849209	00062 : Fatty acid elongation in mitochondria /// 00071 : Fatty acid metabolism /// 00280 : Valine, leucine and isoleucine degradation /// 00310 : Lysine degradation /// 00380 : Tryptophan metabolism /// 00410 : beta-Alanine metabolism /// 00640 : Propanoate metabolism /// 00650 : Butanoate metabolism /// 01040 : Biosynthesis of unsaturated fatty acids /// 01100 : Metabolic pathways	GO:0005739 - mitochondrion /// GO:0005739 - mitochondrion /// GO:0005743 - mitochondrial inner membrane /// GO:0005739 - mitochondrion /// GO:0016507 - mitochondrial fatty acid beta-oxidation multienzyme complex /// GO:0042645 - mitochondrial nucleoid	GO:0004300 - enoyl-CoA hydratase activity /// GO:0016509 - long-chain-3-hydroxyacyl-CoA dehydrogenase activity /// GO:0003824 - catalytic activity /// GO:0016491 - oxidoreductase activity /// GO:0016616 - oxidoreductase activity, acting on the CH-OH group of donors, NAD or NADP as acceptor /// GO:0016829 - lyase activity /// GO:0050662 - coenzyme binding /// GO:0000062 - fatty-acyl-CoA binding //…	GO:0055114 - oxidation-reduction process /// GO:0006635 - fatty acid beta-oxidation /// GO:0032868 - response to insulin /// GO:0008152 - metabolic process /// GO:0006629 - lipid metabolic process /// GO:0006631 - fatty acid metabolic process /// GO:0006635 - fatty acid beta-oxidation /// GO:0042493 - response to drug	24847	19	24847	11.6458	0.0262525	11.6641	11.4443	11.8335	0.33053	0.304277	2	8.6993	0.00342654	0.00328156	304.733	8	0.033053	1	0.920574	44.4001	2.72248e-05	4.56504	11.6473	0.195124	0.0861187	-1.04027	0.954156	0.219786	-0.169374	-0.38916	4.91601	-3.78845	-9.4019	0.000915954	0.00456629	7.56873e-06
68802_at	Mypn	myopalladin	Mm.259767	ENSMUSG00000020067	NA	10	-63115795	68802	NM_182992 /// NP_892037	---	GO:0030018 - Z disc /// GO:0031674 - I band /// GO:0005737 - cytoplasm /// GO:0005634 - nucleus /// GO:0030018 - Z disc /// GO:0031674 - I band	GO:0003779 - actin binding /// GO:0008092 - cytoskeletal protein binding /// GO:0017124 - SH3 domain binding /// GO:0051371 - muscle alpha-actinin binding	GO:0045214 - sarcomere organization	20283	35	20283	7.88447	0.0403554	7.94259	7.71802	8.00732	0.221687	0.181332	2	8.6993	0.00504769	0.00504442	198.239	8	0.0221687	1	0.817963	17.9619	0.000815495	3.08858	7.88931	0.151834	0.350905	-1.12816	0.777254	0.224572	-0.0647343	-0.289307	4.13858	-1.19297	-5.75874	0.00271905	0.264401	0.000310623
74147_at	Ehhadh	enoyl-Coenzyme A, hydratase/3-hydroxyacy	Mm.28100	ENSMUSG00000022853	5.3.3.8 /// 1.1.1.35 /// 4.2.1.17	16	-21761285	74147	NM_023737 /// NP_076226 /// XM_006522658 /// XP_006522721	00071 : Fatty acid metabolism /// 00280 : Valine, leucine and isoleucine degradation /// 00310 : Lysine degradation /// 00380 : Tryptophan metabolism /// 00410 : beta-Alanine metabolism /// 00640 : Propanoate metabolism /// 00650 : Butanoate metabolism /// 01100 : Metabolic pathways /// 03320 : PPAR signaling pathway /// 04146 : Peroxisome	GO:0005777 - peroxisome /// GO:0005739 - mitochondrion /// GO:0005829 - cytosol /// GO:0005777 - peroxisome /// GO:0005634 - nucleus /// GO:0005737 - cytoplasm /// GO:0043231 - intracellular membrane-bounded organelle	GO:0003857 - 3-hydroxyacyl-CoA dehydrogenase activity /// GO:0003824 - catalytic activity /// GO:0004165 - dodecenoyl-CoA delta-isomerase activity /// GO:0004300 - enoyl-CoA hydratase activity /// GO:0016491 - oxidoreductase activity /// GO:0016616 - oxidoreductase activity, acting on the CH-OH group of donors, NAD or NADP as acceptor /// GO:0016829 - lyase activity /// GO:0016853 - isomerase act…	GO:0006635 - fatty acid beta-oxidation /// GO:0006637 - acyl-CoA metabolic process /// GO:0006635 - fatty acid beta-oxidation /// GO:0008152 - metabolic process /// GO:0006629 - lipid metabolic process /// GO:0006631 - fatty acid metabolic process /// GO:0055114 - oxidation-reduction process /// GO:0006475 - internal protein amino acid acetylation	22684	23	22684	4.97078	0.174096	4.92836	4.69434	5.27905	0.865309	0.691213	2	8.6993	0.0204215	0.0217621	45.9515	8	0.0865309	1	0.798804	16.9237	0.0010033	2.99857	4.96725	0.294292	-0.132156	-0.927351	1.05951	0.23402	-0.350697	-0.584717	2.14413	-3.21314	-5.78652	0.061647	0.0110805	0.000300245
224805_at	Aars2	alanyl-tRNA synthetase 2, mitochondrial	Mm.329063	ENSMUSG00000023938	6.1.1.7	17	45506841	224805	NM_198608 /// NP_941010 /// XR_385317	00970 : Aminoacyl-tRNA biosynthesis	GO:0005739 - mitochondrion /// GO:0005737 - cytoplasm /// GO:0005739 - mitochondrion	GO:0000049 - tRNA binding /// GO:0000166 - nucleotide binding /// GO:0003676 - nucleic acid binding /// GO:0003723 - RNA binding /// GO:0004812 - aminoacyl-tRNA ligase activity /// GO:0046872 - metal ion binding /// GO:0005524 - ATP binding /// GO:0016874 - ligase activity /// GO:0016876 - ligase activity, forming aminoacyl-tRNA and related compounds /// GO:0004813 - alanine-tRNA ligase activity	GO:0006412 - translation /// GO:0006419 - alanyl-tRNA aminoacylation /// GO:0043039 - tRNA aminoacylation /// GO:0033108 - mitochondrial respiratory chain complex assembly /// GO:0070143 - mitochondrial alanyl-tRNA aminoacylation	9848	36	9848	5.55306	0.0213708	5.67989	5.43823	5.57275	0.123925	0.102554	2	8.6993	0.00286538	0.00267135	374.342	8	0.0123925	1	0.82755	17.8953	0.00082616	3.08294	5.56363	0.121089	0.960181	-1.03555	0.0753734	0.241662	0.107141	-0.134521	5.91097	2.62063	-3.55398	0.000258171	0.0285594	0.00652163
17355_at	Aff1	AF4/FMR2 family, member 1	Mm.6949	ENSMUSG00000029313	NA	5	103754162; 103754573	17355	NM_001080798 /// NM_133919 /// NP_001074267 /// NP_598680 /// XM_006534801 /// XM_006534802 /// XP_006534864 /// XP_006534865	---	GO:0005634 - nucleus /// GO:0008023 - transcription elongation factor complex	GO:0003700 - sequence-specific DNA binding transcription factor activity	GO:0006351 - transcription, DNA-templated /// GO:0006355 - regulation of transcription, DNA-templated /// GO:0045893 - positive regulation of transcription, DNA-templated	6473	38	6473	6.35928	0.0346362	6.56377	6.31274	6.25244	0.214408	0.179772	2	8.6993	0.00439026	0.00432952	230.972	8	0.0214408	1	0.838457	20.4739	0.000512719	3.29012	6.37632	0.165115	1.13529	-0.385035	-0.75025	0.251028	0.311331	0.0603027	4.96043	6.15204	1.28708	0.00086304	0.000193824	0.231254
12715_at	Ckm	creatine kinase, muscle	Mm.2375	ENSMUSG00000030399	2.7.3.2	7	19411094	12715	NM_007710 /// NP_031736	00330 : Arginine and proline metabolism /// 01100 : Metabolic pathways	GO:0005737 - cytoplasm	GO:0004111 - creatine kinase activity /// GO:0000166 - nucleotide binding /// GO:0003824 - catalytic activity /// GO:0005524 - ATP binding /// GO:0016301 - kinase activity /// GO:0016740 - transferase activity /// GO:0016772 - transferase activity, transferring phosphorus-containing groups /// GO:0004111 - creatine kinase activity	GO:0006603 - phosphocreatine metabolic process /// GO:0046314 - phosphocreatine biosynthetic process /// GO:0016310 - phosphorylation /// GO:0046314 - phosphocreatine biosynthetic process	4195	20	4195	11.2305	0.0417492	11.2496	10.9976	11.4492	0.45124	0.409491	2	8.6993	0.00520791	0.00521865	191.621	8	0.045124	1	0.907479	39.3144	4.39632e-05	4.35691	11.2321	0.226336	0.0771627	-1.03635	0.959183	0.252027	-0.199633	-0.45166	4.57254	-3.62195	-8.85106	0.00146531	0.00587717	1.22324e-05
93747_at	Echs1	enoyl Coenzyme A hydratase, short chain,	Mm.24452	ENSMUSG00000025465	4.2.1.17	7	-140105723	93747	NM_053119 /// NP_444349	00062 : Fatty acid elongation in mitochondria /// 00071 : Fatty acid metabolism /// 00280 : Valine, leucine and isoleucine degradation /// 00310 : Lysine degradation /// 00380 : Tryptophan metabolism /// 00410 : beta-Alanine metabolism /// 00640 : Propanoate metabolism /// 00650 : Butanoate metabolism /// 01100 : Metabolic pathways	GO:0005739 - mitochondrion /// GO:0005739 - mitochondrion /// GO:0070062 - extracellular vesicular exosome	GO:0003824 - catalytic activity /// GO:0016829 - lyase activity /// GO:0004300 - enoyl-CoA hydratase activity	GO:0008152 - metabolic process /// GO:0006629 - lipid metabolic process /// GO:0006631 - fatty acid metabolic process	24714	18	24714	9.71517	0.0222283	9.74663	9.49268	9.91406	0.381444	0.359216	2	8.6993	0.00296395	0.00277854	359.902	8	0.0381444	1	0.941726	60.5975	7.81718e-06	5.10695	9.71779	0.212168	0.135921	-1.06101	0.925087	0.253951	-0.167436	-0.421387	6.10739	-4.02675	-10.9461	0.000204279	0.0032027	2.21434e-06
18777_at	Lypla1	lysophospholipase 1	Mm.299955	ENSMUSG00000025903	3.1.1.5	1	4807893	18777	NM_008866 /// NP_032892 /// XM_006495471 /// XM_006495472 /// XP_006495534 /// XP_006495535	00564 : Glycerophospholipid metabolism	GO:0005739 - mitochondrion /// GO:0005829 - cytosol /// GO:0005737 - cytoplasm /// GO:0070062 - extracellular vesicular exosome	GO:0016289 - CoA hydrolase activity /// GO:0016787 - hydrolase activity /// GO:0034843 - 2-oxoglutaryl-CoA thioesterase activity /// GO:0034869 - 2,4,4-trimethyl-3-oxopentanoyl-CoA thioesterase activity /// GO:0034946 - 3-isopropylbut-3-enoyl-CoA thioesterase activity /// GO:0044466 - glutaryl-CoA hydrolase activity /// GO:0047617 - acyl-CoA hydrolase activity /// GO:0004622 - lysophospholipase a…	GO:0002084 - protein depalmitoylation /// GO:0042997 - negative regulation of Golgi to plasma membrane protein transport /// GO:0006629 - lipid metabolic process /// GO:0006631 - fatty acid metabolic process /// GO:0098734 - macromolecule depalmitoylation	7099	16	7099	8.58968	0.035287	8.63548	8.37891	8.76611	0.343796	0.308509	2	8.6993	0.00446507	0.00441087	226.713	8	0.0343796	1	0.897361	34.5469	7.26934e-05	4.13851	8.5935	0.196987	0.213097	-1.08937	0.876275	0.25657	-0.130637	-0.387207	5.02728	-2.55974	-8.19491	0.000789534	0.0315119	2.23972e-05
224111_at	Ubxn7	UBX domain protein 7	Mm.31275	ENSMUSG00000053774	NA	16	32332252	224111	NM_177633 /// NP_808301 /// XM_006522079 /// XM_006522080 /// XP_006522142 /// XP_006522143	---	GO:0005634 - nucleus /// GO:0034098 - Cdc48p-Npl4p-Ufd1p AAA ATPase complex	GO:0008134 - transcription factor binding /// GO:0031625 - ubiquitin protein ligase binding /// GO:0043130 - ubiquitin binding	GO:0008150 - biological_process	9768	32	9767	6.42666	0.0141593	6.5527	6.2937	6.46509	0.13844	0.124281	2	8.6993	0.00203641	0.00176992	564.998	8	0.013844	1	0.897722	30.5147	0.000117013	3.93177	6.43716	0.13174	0.87703	-1.08899	0.211957	0.259004	0.0876169	-0.171387	7.51476	2.54212	-5.37105	4.37228e-05	0.0324218	0.000504573
54611_at	Pde3a	phosphodiesterase 3A, cGMP inhibited	Mm.103728; Mm.485878	ENSMUSG00000041741	3.1.4.17	6	141249269	54611	NM_018779 /// NP_061249 /// XM_006506979 /// XP_006507042	00230 : Purine metabolism /// 04910 : Insulin signaling pathway /// 04914 : Progesterone-mediated oocyte maturation	GO:0016021 - integral component of membrane /// GO:0016020 - membrane /// GO:0005829 - cytosol	GO:0004115 - 3',5'-cyclic-AMP phosphodiesterase activity /// GO:0004114 - 3',5'-cyclic-nucleotide phosphodiesterase activity /// GO:0046872 - metal ion binding /// GO:0008081 - phosphoric diester hydrolase activity /// GO:0016787 - hydrolase activity /// GO:0004115 - 3',5'-cyclic-AMP phosphodiesterase activity /// GO:0004119 - cGMP-inhibited cyclic-nucleotide phosphodiesterase activity /// GO:003…	GO:0001556 - oocyte maturation /// GO:0042493 - response to drug /// GO:0040020 - regulation of meiosis /// GO:0060282 - positive regulation of oocyte development /// GO:0007165 - signal transduction /// GO:0006198 - cAMP catabolic process /// GO:0043066 - negative regulation of apoptotic process /// GO:0019933 - cAMP-mediated signaling /// GO:0019934 - cGMP-mediated signaling /// GO:0043116 - ne…	16684	30	16685	7.15084	0.0684823	7.1999	6.93457	7.33032	0.391649	0.323166	2	8.6993	0.00828094	0.00856029	116.818	8	0.0391649	1	0.825143	19.5127	0.000608814	3.21552	7.15493	0.201672	0.22298	-1.09267	0.869688	0.265329	-0.130423	-0.395752	3.81757	-1.87653	-6.15033	0.00437078	0.0944565	0.000194213
16922_at	Phyh	phytanoyl-CoA hydroxylase	Mm.391704	ENSMUSG00000026664	1.14.11.18	2	4918996	16922	NM_010726 /// NP_034856	04146 : Peroxisome	GO:0005777 - peroxisome /// GO:0005739 - mitochondrion /// GO:0005777 - peroxisome	GO:0003824 - catalytic activity /// GO:0005515 - protein binding /// GO:0046872 - metal ion binding /// GO:0016491 - oxidoreductase activity /// GO:0031418 - L-ascorbic acid binding /// GO:0051213 - dioxygenase activity /// GO:0048037 - cofactor binding /// GO:0048244 - phytanoyl-CoA dioxygenase activity	GO:0001561 - fatty acid alpha-oxidation /// GO:0055114 - oxidation-reduction process /// GO:0001561 - fatty acid alpha-oxidation /// GO:0006720 - isoprenoid metabolic process /// GO:0097089 - methyl-branched fatty acid metabolic process	6058	18	6058	9.01383	0.0294225	9.08262	8.81641	9.15967	0.284599	0.255177	2	8.6993	0.00379094	0.00367782	271.901	8	0.0284599	1	0.896618	33.6562	8.04005e-05	4.09474	9.01957	0.180109	0.350106	-1.12798	0.777874	0.266217	-0.0770449	-0.343262	5.66114	-1.63837	-7.88437	0.000350296	0.136935	3.02281e-05
73078_at	Pmpcb	peptidase (mitochondrial processing) bet	Mm.301655	ENSMUSG00000029017	NA	5	21737160	73078	NM_028431 /// NP_082707 /// XR_389754	---	GO:0005739 - mitochondrion /// GO:0005743 - mitochondrial inner membrane /// GO:0005739 - mitochondrion	GO:0003824 - catalytic activity /// GO:0004222 - metalloendopeptidase activity /// GO:0008237 - metallopeptidase activity /// GO:0008233 - peptidase activity /// GO:0046872 - metal ion binding /// GO:0016787 - hydrolase activity	GO:0006508 - proteolysis	22225	24	22225	9.2345	0.0258042	9.27131	9.00293	9.43848	0.410793	0.384989	2	8.6993	0.00337501	0.00322552	310.027	8	0.0410793	1	0.937185	57.0353	9.99098e-06	5.00039	9.23757	0.219724	0.153537	-1.06789	0.914352	0.268377	-0.16717	-0.435547	6.04853	-3.76758	-10.6026	0.000219011	0.00471212	2.87135e-06
70207_at	Taco1	translational activator of mitochondrial	Mm.343857	ENSMUSG00000001983	NA	11	106066107	70207	NM_027346 /// NP_081622 /// XM_006534154 /// XP_006534217	---	GO:0005739 - mitochondrion /// GO:0005739 - mitochondrion /// GO:0005634 - nucleus	GO:0003674 - molecular_function	GO:0008150 - biological_process /// GO:0006417 - regulation of translation	20933	24	20933	6.78283	0.119965	6.75613	6.48682	7.09888	0.872144	0.752178	2	8.6993	0.014199	0.0149957	66.6858	8	0.0872144	1	0.862448	26.487	0.000199587	3.69987	6.78061	0.306764	-0.0798029	-0.957707	1.03751	0.269309	-0.342751	-0.612061	2.95913	-3.7661	-7.26407	0.0165767	0.00472264	5.6608e-05
13629_at	Eef2	eukaryotic translation elongation factor	Mm.326799; Mm.482883; Mm.486637	ENSMUSG00000034994	NA	10	81176631	13629	NM_007907 /// NP_031933	---	GO:0005844 - polysome /// GO:0005737 - cytoplasm /// GO:0030529 - ribonucleoprotein complex /// GO:0016020 - membrane /// GO:0005634 - nucleus /// GO:0070062 - extracellular vesicular exosome	GO:0003924 - GTPase activity /// GO:0005515 - protein binding /// GO:0000166 - nucleotide binding /// GO:0003746 - translation elongation factor activity /// GO:0005525 - GTP binding /// GO:0008494 - translation activator activity /// GO:0019901 - protein kinase binding /// GO:0044822 - poly(A) RNA binding	GO:0006184 - GTP catabolic process /// GO:0006414 - translational elongation /// GO:0002244 - hematopoietic progenitor cell differentiation /// GO:0006412 - translation /// GO:0010628 - positive regulation of gene expression /// GO:0045727 - positive regulation of translation	4650	13	4650	10.7131	0.0445529	10.7977	10.5269	10.8359	0.265131	0.220578	2	8.6993	0.00553021	0.00556912	179.562	8	0.0265131	1	0.831959	19.943	0.000563279	3.24928	10.7202	0.168499	0.460168	-1.14724	0.687077	0.270848	-0.0382339	-0.309082	4.76866	-0.673162	-5.87784	0.00111814	0.518325	0.000268705
22273_at	Uqcrc1	ubiquinol-cytochrome c reductase core pr	Mm.335460	ENSMUSG00000025651	1.10.2.2	9	108936648	22273	NM_025407 /// NP_079683	00190 : Oxidative phosphorylation /// 01100 : Metabolic pathways /// 04260 : Cardiac muscle contraction /// 05010 : Alzheimer's disease /// 05012 : Parkinson's disease /// 05016 : Huntington's disease	GO:0005739 - mitochondrion /// GO:0005743 - mitochondrial inner membrane /// GO:0016020 - membrane /// GO:0070469 - respiratory chain /// GO:0005739 - mitochondrion /// GO:0005750 - mitochondrial respiratory chain complex III	GO:0005515 - protein binding /// GO:0003824 - catalytic activity /// GO:0046872 - metal ion binding /// GO:0032403 - protein complex binding	GO:0006122 - mitochondrial electron transport, ubiquinol to cytochrome c /// GO:0055114 - oxidation-reduction process /// GO:0006810 - transport	9590	26	9590	11.1898	0.0337528	11.2206	10.9443	11.4121	0.475303	0.44155	2	8.6993	0.00428871	0.0042191	237.017	8	0.0475303	1	0.928987	51.4782	1.50961e-05	4.82114	11.1924	0.235166	0.120259	-1.05469	0.934432	0.276308	-0.191465	-0.467773	5.52423	-3.82797	-10.1015	0.000415538	0.00430311	4.25128e-06
17897_at	Myl3	myosin, light polypeptide 3	Mm.7353	ENSMUSG00000059741	NA	9	110763681	17897	NM_010859 /// NP_034989	04260 : Cardiac muscle contraction /// 05410 : Hypertrophic cardiomyopathy (HCM) /// 05414 : Dilated cardiomyopathy	GO:0016459 - myosin complex /// GO:0031672 - A band /// GO:0031674 - I band	GO:0005509 - calcium ion binding /// GO:0003774 - motor activity /// GO:0003785 - actin monomer binding	GO:0008152 - metabolic process /// GO:0002026 - regulation of the force of heart contraction /// GO:0006942 - regulation of striated muscle contraction /// GO:0055010 - ventricular cardiac muscle tissue morphogenesis /// GO:0060048 - cardiac muscle contraction	6606	13	6606	11.8854	0.0184753	11.9859	11.7061	11.9893	0.220589	0.202114	2	8.6993	0.00253253	0.00230941	433.011	8	0.0220589	1	0.916246	39.9035	4.14736e-05	4.38223	11.8937	0.162551	0.567034	-1.15464	0.587606	0.279859	-0.00334399	-0.283203	7.28121	-0.0870019	-7.95858	5.56056e-05	0.93264	2.81146e-05
56357_at	Ivd	isovaleryl coenzyme A dehydrogenase	Mm.6635	ENSMUSG00000027332	1.3.99.10	2	118862000	56357	NM_019826 /// NP_062800 /// XM_006499925 /// XP_006499988	00280 : Valine, leucine and isoleucine degradation /// 01100 : Metabolic pathways	GO:0005739 - mitochondrion /// GO:0005759 - mitochondrial matrix /// GO:0031966 - mitochondrial membrane	GO:0003995 - acyl-CoA dehydrogenase activity /// GO:0016491 - oxidoreductase activity /// GO:0016627 - oxidoreductase activity, acting on the CH-CH group of donors /// GO:0050660 - flavin adenine dinucleotide binding /// GO:0008470 - isovaleryl-CoA dehydrogenase activity	GO:0008152 - metabolic process /// GO:0055114 - oxidation-reduction process /// GO:0006552 - leucine catabolic process	16968	19	16968	8.52263	0.0467116	8.61358	8.32715	8.6499	0.289171	0.242459	2	8.6993	0.00577835	0.00583895	171.264	8	0.0289171	1	0.838464	20.98	0.000469632	3.32824	8.53021	0.176791	0.471561	-1.14859	0.67703	0.286429	-0.0363252	-0.322754	4.93351	-0.625673	-6.00461	0.000894699	0.54759	0.000230761
15185_at	Hdac6	histone deacetylase 6	Mm.29854	ENSMUSG00000031161	NA	X	-7930122	15185	NM_001130416 /// NM_010413 /// NP_001123888 /// NP_034543 /// XM_006527567 /// XP_006527630	---	GO:0005634 - nucleus /// GO:0005829 - cytosol /// GO:0005634 - nucleus /// GO:0005737 - cytoplasm /// GO:0005881 - cytoplasmic microtubule /// GO:0030424 - axon /// GO:0030425 - dendrite /// GO:0043204 - perikaryon /// GO:0043234 - protein complex /// GO:0042995 - cell projection /// GO:0000118 - histone deacetylase complex /// GO:0005874 - microtubule /// GO:0005875 - microtubule associated comp…	GO:0004407 - histone deacetylase activity /// GO:0008017 - microtubule binding /// GO:0042903 - tubulin deacetylase activity /// GO:0043130 - ubiquitin binding /// GO:0048487 - beta-tubulin binding /// GO:0005515 - protein binding /// GO:0003779 - actin binding /// GO:0046872 - metal ion binding /// GO:0008270 - zinc ion binding /// GO:0016787 - hydrolase activity /// GO:0031078 - histone deacety…	GO:0000209 - protein polyubiquitination /// GO:0006476 - protein deacetylation /// GO:0007026 - negative regulation of microtubule depolymerization /// GO:0016575 - histone deacetylation /// GO:0090042 - tubulin deacetylation /// GO:0006511 - ubiquitin-dependent protein catabolic process /// GO:0043162 - ubiquitin-dependent protein catabolic process via the multivesicular body sorting pathway ///…	5420	25	5420	5.03158	0.0431904	5.11384	4.82397	5.17749	0.321051	0.277861	2	8.6993	0.00537358	0.0053988	185.226	8	0.0321051	1	0.865472	25.8544	0.000218418	3.66071	5.03844	0.188436	0.400176	-1.13811	0.737939	0.289869	-0.0636467	-0.353516	5.1774	-1.1368	-6.82012	0.000647983	0.285963	9.09463e-05
53382_at	Txnl1	thioredoxin-like 1	Mm.19169	ENSMUSG00000024583	NA	18	-63662801	53382	NM_016792 /// NP_058072	---	GO:0000502 - proteasome complex /// GO:0005634 - nucleus /// GO:0005737 - cytoplasm /// GO:0070062 - extracellular vesicular exosome	GO:0015035 - protein disulfide oxidoreductase activity /// GO:0015036 - disulfide oxidoreductase activity	GO:0045454 - cell redox homeostasis /// GO:0006662 - glycerol ether metabolic process /// GO:0006810 - transport /// GO:0055114 - oxidation-reduction process	16357	21	16357	8.65736	0.0222857	8.79119	8.49561	8.71875	0.195753	0.173467	2	8.6993	0.00297055	0.00278572	358.974	8	0.0195753	1	0.886154	29.1978	0.000138347	3.85903	8.66852	0.154064	0.796275	-1.12233	0.326059	0.295588	0.0724432	-0.223145	7.10083	1.74029	-5.79005	6.72183e-05	0.116961	0.000298951
67041_at	Oxct1	3-oxoacid CoA transferase 1	Mm.13445	ENSMUSG00000022186	2.8.3.5	15	4026428	67041	NM_024188 /// NP_077150	00072 : Synthesis and degradation of ketone bodies /// 00280 : Valine, leucine and isoleucine degradation /// 00650 : Butanoate metabolism	GO:0005739 - mitochondrion /// GO:0005739 - mitochondrion	GO:0008260 - 3-oxoacid CoA-transferase activity /// GO:0008410 - CoA-transferase activity /// GO:0016740 - transferase activity /// GO:0008260 - 3-oxoacid CoA-transferase activity /// GO:0042803 - protein homodimerization activity	GO:0046950 - cellular ketone body metabolic process /// GO:0042182 - ketone catabolic process /// GO:0046952 - ketone body catabolic process /// GO:0008152 - metabolic process /// GO:0035774 - positive regulation of insulin secretion involved in cellular response to glucose stimulus /// GO:0046950 - cellular ketone body metabolic process	19209	32	19209	10.9274	0.111136	10.9565	10.6602	11.1729	0.640339	0.529203	2	8.6993	0.013184	0.013892	71.9839	8	0.0640339	1	0.826442	20.0698	0.000550663	3.25911	10.9298	0.257386	0.103592	-1.04776	0.944172	0.296342	-0.216353	-0.512695	3.37918	-2.46706	-6.31466	0.00854483	0.0366059	0.000160412
67715_at	2010106E10Rik	RIKEN cDNA 2010106E10 gene	Mm.45323	ENSMUSG00000025528	NA	X	112495274	67715	NM_001168590 /// NM_026333 /// NP_001162062 /// NP_080609	---	GO:0005575 - cellular_component	GO:0003674 - molecular_function	GO:0008150 - biological_process	19700	24	19701	1.90018	0.0350639	2.11676	1.82001	1.81793	0.228552	0.193488	2	8.6993	0.00443943	0.00438299	228.155	8	0.0228552	1	0.846582	21.792	0.000409402	3.38785	1.91823	0.171932	1.15468	-0.571305	-0.583375	0.296751	0.298826	0.0020752	5.83137	5.87215	0.0440464	0.000284279	0.000270563	0.965862
231086_at	Hadhb	hydroxyacyl-Coenzyme A dehydrogenase/3-k	Mm.291463; Mm.389348	ENSMUSG00000059447	2.3.1.16	5	30155322	231086	NM_001289798 /// NM_001289799 /// NM_145558 /// NP_001276727 /// NP_001276728 /// NP_663533 /// XM_006535705 /// XM_006535706 /// XP_006535768 /// XP_006535769	00062 : Fatty acid elongation in mitochondria /// 00071 : Fatty acid metabolism /// 00280 : Valine, leucine and isoleucine degradation /// 01100 : Metabolic pathways	GO:0005739 - mitochondrion /// GO:0005739 - mitochondrion /// GO:0005743 - mitochondrial inner membrane /// GO:0005739 - mitochondrion /// GO:0016507 - mitochondrial fatty acid beta-oxidation multienzyme complex /// GO:0016020 - membrane /// GO:0005739 - mitochondrion /// GO:0005783 - endoplasmic reticulum /// GO:0005741 - mitochondrial outer membrane /// GO:0005743 - mitochondrial inner membrane…	GO:0003988 - acetyl-CoA C-acyltransferase activity /// GO:0003988 - acetyl-CoA C-acyltransferase activity /// GO:0016509 - long-chain-3-hydroxyacyl-CoA dehydrogenase activity /// GO:0003824 - catalytic activity /// GO:0016740 - transferase activity /// GO:0016746 - transferase activity, transferring acyl groups /// GO:0016747 - transferase activity, transferring acyl groups other than amino-acyl …	GO:0006635 - fatty acid beta-oxidation /// GO:0055114 - oxidation-reduction process /// GO:0008152 - metabolic process /// GO:0006629 - lipid metabolic process /// GO:0006631 - fatty acid metabolic process /// GO:0006635 - fatty acid beta-oxidation	10565	5	10565	10.6118	0.0633279	10.6744	10.3774	10.7993	0.435415	0.372087	2	8.6993	0.00768843	0.00791599	126.327	8	0.0435415	1	0.854557	24.1979	0.000279152	3.55416	10.617	0.2167	0.264519	-1.10567	0.841148	0.296919	-0.124956	-0.421875	4.43365	-1.86586	-6.80425	0.00178059	0.096061	9.25387e-05
24053_at	Sgcg	sarcoglycan, gamma (dystrophin-associate	Mm.72173	ENSMUSG00000035296	NA	14	-61219115	24053	NM_011892 /// NP_036022 /// XM_006519012 /// XP_006519075	05410 : Hypertrophic cardiomyopathy (HCM) /// 05412 : Arrhythmogenic right ventricular cardiomyopathy (ARVC) /// 05414 : Dilated cardiomyopathy /// 05416 : Viral myocarditis	GO:0005887 - integral component of plasma membrane /// GO:0016011 - dystroglycan complex /// GO:0016012 - sarcoglycan complex /// GO:0042383 - sarcolemma /// GO:0005886 - plasma membrane /// GO:0016021 - integral component of membrane /// GO:0016020 - membrane /// GO:0005737 - cytoplasm /// GO:0005856 - cytoskeleton	GO:0005515 - protein binding	GO:0061024 - membrane organization	11543	19	11543	8.95947	0.0362109	9.10529	8.80811	9.00146	0.198701	0.162491	2	8.6993	0.00457127	0.00452636	220.928	8	0.0198701	1	0.817763	17.773	0.000846213	3.07252	8.97162	0.150824	0.88627	-1.08415	0.197875	0.297186	0.103826	-0.193359	5.75508	2.01062	-4.04447	0.000312019	0.0763436	0.00312033
58207_at	Slc43a3	solute carrier family 43, member 3	Mm.290729; Mm.490497	ENSMUSG00000027074	NA	2	84936646	58207	NM_021398 /// NP_067373 /// XM_006499957 /// XM_006499958 /// XM_006499959 /// XM_006499960 /// XM_006499961 /// XM_006499962 /// XP_006500020 /// XP_006500021 /// XP_006500022 /// XP_006500023 /// XP_006500024 /// XP_006500025	---	GO:0016021 - integral component of membrane /// GO:0016020 - membrane	---	GO:0055085 - transmembrane transport	17371	29	17371	9.20232	0.071391	9.48532	9.18213	9.01025	0.46085	0.389459	2	8.6993	0.00861529	0.00892388	112.059	8	0.046085	1	0.845088	22.6027	0.000358472	3.44555	9.2259	0.24054	1.07849	-0.181977	-0.896515	0.303193	0.475068	0.171875	4.27687	6.70135	2.61874	0.00222624	0.000103635	0.0286465
69870_at	Polr3gl	polymerase (RNA) III (DNA directed) poly	Mm.292739	ENSMUSG00000028104	2.7.7.6	3	-96577874	69870	NM_001293701 /// NM_027241 /// NP_001280630 /// NP_081517 /// XM_006502041 /// XM_006502042 /// XM_006502043 /// XP_006502104 /// XP_006502105 /// XP_006502106 /// XR_375575	00230 : Purine metabolism /// 00240 : Pyrimidine metabolism /// 01100 : Metabolic pathways /// 03020 : RNA polymerase /// 04623 : Cytosolic DNA-sensing pathway	GO:0000790 - nuclear chromatin /// GO:0005666 - DNA-directed RNA polymerase III complex /// GO:0000790 - nuclear chromatin /// GO:0005666 - DNA-directed RNA polymerase III complex	GO:0001056 - RNA polymerase III activity	GO:0006384 - transcription initiation from RNA polymerase III promoter	20812	19	20812	6.74917	0.0192057	6.93087	6.62598	6.73608	0.179643	0.160437	2	8.6993	0.0026165	0.00240071	416.543	8	0.0179643	1	0.89309	30.6588	0.000114932	3.93956	6.76431	0.154395	1.0788	-0.895976	-0.182821	0.304895	0.194787	-0.110107	7.80425	4.98588	-3.04419	3.27084e-05	0.000834218	0.0144759
504186_at	Chrna10	cholinergic receptor, nicotinic, alpha p	Mm.334074	ENSMUSG00000066279	NA	7	-102111266	504186	NM_001081424 /// NP_001074893 /// XM_006508008 /// XM_006508009 /// XP_006508071 /// XP_006508072	04080 : Neuroactive ligand-receptor interaction	GO:0005886 - plasma membrane /// GO:0016021 - integral component of membrane /// GO:0016020 - membrane /// GO:0030054 - cell junction /// GO:0045202 - synapse /// GO:0045211 - postsynaptic membrane /// GO:0005829 - cytosol /// GO:0005892 - acetylcholine-gated channel complex /// GO:0030424 - axon /// GO:0043204 - perikaryon	GO:0004889 - acetylcholine-activated cation-selective channel activity /// GO:0004889 - acetylcholine-activated cation-selective channel activity	GO:0007271 - synaptic transmission, cholinergic /// GO:0042472 - inner ear morphogenesis /// GO:0050910 - detection of mechanical stimulus involved in sensory perception of sound /// GO:0098655 - cation transmembrane transport /// GO:0006810 - transport /// GO:0006811 - ion transport /// GO:0007204 - positive regulation of cytosolic calcium ion concentration	16068	20	16068	2.77321	0.066651	3.04507	2.73816	2.60437	0.407316	0.340665	2	8.6993	0.00807042	0.00833137	120.028	8	0.0407316	1	0.836366	21.1058	0.000459619	3.3376	2.79587	0.225946	1.10293	-0.255402	-0.847531	0.306911	0.4407	0.133789	4.47307	6.42298	2.10614	0.0016843	0.000141676	0.0655239
17868_at	Mybpc3	myosin binding protein C, cardiac	Mm.10728	ENSMUSG00000002100	NA	2	91118144	17868	NM_008653 /// NP_032679 /// XM_006498879 /// XM_006498880 /// XM_006498881 /// XM_006498882 /// XP_006498942 /// XP_006498943 /// XP_006498944 /// XP_006498945	05410 : Hypertrophic cardiomyopathy (HCM) /// 05414 : Dilated cardiomyopathy	GO:0005856 - cytoskeleton /// GO:0030016 - myofibril /// GO:0030017 - sarcomere /// GO:0031672 - A band /// GO:0032982 - myosin filament /// GO:0005863 - striated muscle myosin thick filament /// GO:0030017 - sarcomere /// GO:0031672 - A band	GO:0005200 - structural constituent of cytoskeleton /// GO:0032036 - myosin heavy chain binding /// GO:0003779 - actin binding /// GO:0046872 - metal ion binding /// GO:0008307 - structural constituent of muscle /// GO:0042802 - identical protein binding /// GO:0017022 - myosin binding /// GO:0032036 - myosin heavy chain binding	GO:0006936 - muscle contraction /// GO:0002027 - regulation of heart rate /// GO:0003007 - heart morphogenesis /// GO:0008016 - regulation of heart contraction /// GO:0031034 - myosin filament assembly /// GO:0045214 - sarcomere organization /// GO:0060048 - cardiac muscle contraction /// GO:0007155 - cell adhesion /// GO:0003007 - heart morphogenesis /// GO:0055010 - ventricular cardiac muscle t…	6588	21	6588	11.0387	0.0999341	11.0748	10.7671	11.2832	0.638061	0.538127	2	8.6993	0.0118964	0.0124918	80.0528	8	0.0638061	1	0.843379	22.6173	0.000357631	3.44656	11.0417	0.259645	0.127518	-1.05764	0.930124	0.307721	-0.208393	-0.516113	3.69395	-2.50159	-6.69195	0.00526716	0.0346178	0.00010472
24100_at	Tpra1	transmembrane protein, adipocyte asscoci	Mm.284480	ENSMUSG00000002871	NA	6	88902251	24100	NM_011906 /// NP_036036 /// XM_006506061 /// XM_006506062 /// XM_006506063 /// XM_006506064 /// XP_006506124 /// XP_006506125 /// XP_006506126 /// XP_006506127 /// XR_377450	---	GO:0016021 - integral component of membrane /// GO:0016020 - membrane	---	---	11605	30	11605	6.33967	0.029882	6.56513	6.24927	6.26099	0.239839	0.209957	2	8.6993	0.00384375	0.00373524	267.72	8	0.0239839	1	0.875408	27.3114	0.000177948	3.74971	6.35846	0.179078	1.15408	-0.609761	-0.544322	0.315866	0.304147	-0.0117188	6.67063	6.42315	-0.267312	0.000107225	0.000141649	0.795458
66904_at	Pccb	propionyl Coenzyme A carboxylase, beta p	Mm.335385	ENSMUSG00000032527	6.4.1.3	9	-100982038	66904	NM_025835 /// NP_080111 /// XM_006511369 /// XM_006511370 /// XP_006511432 /// XP_006511433	00280 : Valine, leucine and isoleucine degradation /// 00630 : Glyoxylate and dicarboxylate metabolism /// 00640 : Propanoate metabolism /// 01100 : Metabolic pathways	GO:0005739 - mitochondrion	GO:0004658 - propionyl-CoA carboxylase activity /// GO:0000166 - nucleotide binding /// GO:0005524 - ATP binding /// GO:0016874 - ligase activity	---	19110	28	19110	7.60755	0.0272783	7.73615	7.4165	7.70215	0.258683	0.231404	2	8.6993	0.00354446	0.00340979	293.273	8	0.0258683	1	0.894549	32.6431	9.04262e-05	4.04371	7.61827	0.175558	0.671477	-1.14927	0.477796	0.319647	0.0340021	-0.285645	7.0297	0.747778	-6.78525	7.25095e-05	0.474322	9.4485e-05
75475_at	Oplah	5-oxoprolinase (ATP-hydrolysing)	Mm.322738	ENSMUSG00000022562	3.5.2.9	15	-76296603	75475	NM_153122 /// NP_694762 /// XM_006521507 /// XM_006521508 /// XM_006521509 /// XP_006521570 /// XP_006521571 /// XP_006521572 /// XR_384054	00480 : Glutathione metabolism	GO:0005575 - cellular_component	GO:0017168 - 5-oxoprolinase (ATP-hydrolyzing) activity /// GO:0000166 - nucleotide binding /// GO:0003824 - catalytic activity /// GO:0005524 - ATP binding /// GO:0016787 - hydrolase activity	GO:0006749 - glutathione metabolic process	23298	27	23298	6.34787	0.0257141	6.37447	6.05469	6.62109	0.670265	0.644551	2	8.6993	0.00336466	0.00321427	311.113	8	0.0670265	1	0.961636	95.7826	1.1892e-06	5.92474	6.35008	0.283989	0.085864	-1.04016	0.954299	0.31978	-0.246626	-0.566406	7.21809	-5.56687	-13.8093	5.93974e-05	0.000393904	3.24378e-07
56350_at	Arl3	ADP-ribosylation factor-like 3	Mm.22085	ENSMUSG00000025035	NA	19	-46531109	56350	NM_019718 /// NP_062692 /// XM_006527223 /// XP_006527286	---	GO:0005622 - intracellular /// GO:0005623 - cell /// GO:0005929 - cilium /// GO:0016020 - membrane /// GO:0005737 - cytoplasm /// GO:0005856 - cytoskeleton /// GO:0042995 - cell projection /// GO:0005634 - nucleus /// GO:0005794 - Golgi apparatus /// GO:0005813 - centrosome /// GO:0005876 - spindle microtubule /// GO:0005881 - cytoplasmic microtubule /// GO:0030496 - midbody /// GO:0032391 - phot…	GO:0003924 - GTPase activity /// GO:0005525 - GTP binding /// GO:0019003 - GDP binding /// GO:0005515 - protein binding /// GO:0000166 - nucleotide binding /// GO:0046872 - metal ion binding /// GO:0005525 - GTP binding /// GO:0008017 - microtubule binding /// GO:0019003 - GDP binding	GO:0006184 - GTP catabolic process /// GO:0001822 - kidney development /// GO:0007224 - smoothened signaling pathway /// GO:0042073 - intraciliary transport /// GO:0042461 - photoreceptor cell development /// GO:0006810 - transport /// GO:0007049 - cell cycle /// GO:0015031 - protein transport /// GO:0051301 - cell division /// GO:0000910 - cytokinesis /// GO:0006892 - post-Golgi vesicle-mediated…	16963	23	16963	7.29905	0.0293579	7.47508	7.15259	7.31348	0.208958	0.1796	2	8.6993	0.00378351	0.00366974	272.499	8	0.0208958	1	0.859503	23.7345	0.000299744	3.52325	7.31372	0.161248	1.00074	-0.999257	-0.00148349	0.322495	0.161606	-0.160889	6.86463	3.43995	-3.69907	8.66377e-05	0.00777546	0.00522639
224132_at	Dirc2	disrupted in renal carcinoma 2 (human)	Mm.24094	ENSMUSG00000022848	NA	16	-35694903	224132	NM_153550 /// NP_705778	---	GO:0005575 - cellular_component /// GO:0016021 - integral component of membrane /// GO:0016020 - membrane /// GO:0005764 - lysosome	GO:0003674 - molecular_function	GO:0008150 - biological_process /// GO:0006810 - transport	9773	28	9772	7.48648	0.0251647	7.65877	7.33374	7.51001	0.209744	0.184579	2	8.6993	0.0033015	0.00314559	317.905	8	0.0209744	1	0.880022	27.9538	0.000163059	3.78765	7.50084	0.162707	0.970624	-1.02699	0.0563671	0.325025	0.148756	-0.17627	7.40633	3.38969	-4.33847	4.88509e-05	0.00840629	0.00203831
76055_at	Mgea5	meningioma expressed antigen 5 (hyaluron	Mm.122725; Mm.435821; Mm.440640; Mm.480399	ENSMUSG00000025220	NA	19	-45750259	76055	NM_023799 /// NP_076288 /// XM_006527430 /// XP_006527493 /// XR_386523	---	GO:0005634 - nucleus /// GO:0005737 - cytoplasm /// GO:0016020 - membrane /// GO:0005739 - mitochondrion	GO:0003824 - catalytic activity /// GO:0016740 - transferase activity /// GO:0016746 - transferase activity, transferring acyl groups /// GO:0016787 - hydrolase activity /// GO:0016798 - hydrolase activity, acting on glycosyl bonds /// GO:0004402 - histone acetyltransferase activity /// GO:0016231 - beta-N-acetylglucosaminidase activity	GO:0008152 - metabolic process /// GO:0006044 - N-acetylglucosamine metabolic process /// GO:0006612 - protein targeting to membrane /// GO:0070265 - necrotic cell death /// GO:0010524 - positive regulation of calcium ion transport into cytosol /// GO:0010616 - negative regulation of cardiac muscle adaptation /// GO:0046326 - positive regulation of glucose import /// GO:0016573 - histone acetylat…	23544	31	23544	7.65385	0.0272567	7.78711	7.45972	7.74805	0.266774	0.239517	2	8.6993	0.00354198	0.00340709	293.506	8	0.0266774	1	0.897828	33.8112	7.8989e-05	4.10243	7.66496	0.178814	0.683123	-1.14779	0.464669	0.327393	0.0390625	-0.28833	7.20257	0.859367	-6.85144	6.03727e-05	0.413192	8.78903e-05
18793_at	Plaur	plasminogen activator, urokinase recepto	Mm.1359	ENSMUSG00000046223	NA	7	24462500	18793	NM_011113 /// NP_035243 /// XM_006539638 /// XM_006539639 /// XM_006539640 /// XM_006539641 /// XP_006539701 /// XP_006539702 /// XP_006539703 /// XP_006539704	04610 : Complement and coagulation cascades	GO:0005887 - integral component of plasma membrane /// GO:0005886 - plasma membrane /// GO:0016020 - membrane /// GO:0005576 - extracellular region /// GO:0031225 - anchored component of membrane /// GO:0005925 - focal adhesion /// GO:0070062 - extracellular vesicular exosome	GO:0005515 - protein binding /// GO:0016301 - kinase activity /// GO:0016740 - transferase activity /// GO:0019899 - enzyme binding /// GO:0030377 - urokinase plasminogen activator receptor activity	GO:0016310 - phosphorylation /// GO:0043066 - negative regulation of apoptotic process /// GO:0010628 - positive regulation of gene expression /// GO:0038195 - urokinase plasminogen activator signaling pathway /// GO:0048762 - mesenchymal cell differentiation /// GO:0060742 - epithelial cell differentiation involved in prostate gland development	7113	25	7113	4.52448	0.0942458	4.8391	4.50806	4.30493	0.585095	0.490849	2	8.6993	0.0112425	0.0117807	84.8844	8	0.0585095	1	0.838922	21.8301	0.000406816	3.3906	4.5507	0.269627	1.06965	-0.158147	-0.911503	0.331047	0.534172	0.203125	4.0879	6.59617	2.70924	0.00292782	0.000116505	0.0247549
74776_at	Ppa2	pyrophosphatase (inorganic) 2	Mm.210305	ENSMUSG00000028013	3.6.1.1	3	133310116	74776	NM_001293641 /// NM_146141 /// NP_001280570 /// NP_666253 /// XM_006502214 /// XM_006502215 /// XM_006502216 /// XM_006502217 /// XP_006502277 /// XP_006502278 /// XP_006502279 /// XP_006502280	00190 : Oxidative phosphorylation	GO:0005739 - mitochondrion /// GO:0005737 - cytoplasm /// GO:0070062 - extracellular vesicular exosome	GO:0004722 - protein serine/threonine phosphatase activity /// GO:0000287 - magnesium ion binding /// GO:0004427 - inorganic diphosphatase activity /// GO:0046872 - metal ion binding /// GO:0016787 - hydrolase activity	GO:0016311 - dephosphorylation /// GO:0006796 - phosphate-containing compound metabolic process	23009	24	23009	7.62385	0.0500492	7.7331	7.40112	7.76465	0.363584	0.313534	2	8.6993	0.00616201	0.00625615	159.843	8	0.0363584	1	0.862345	25.4409	0.000231914	3.63467	7.63296	0.201394	0.497258	-1.15115	0.653896	0.331979	-0.0315459	-0.363525	5.53722	-0.526167	-6.5492	0.000408814	0.611921	0.000122808
94062_at	Mrpl3	mitochondrial ribosomal protein L3	Mm.29746	ENSMUSG00000032563	NA	9	105053268	94062	NM_053159 /// NP_444389	---	GO:0005739 - mitochondrion /// GO:0005622 - intracellular /// GO:0030529 - ribonucleoprotein complex /// GO:0005840 - ribosome /// GO:0005762 - mitochondrial large ribosomal subunit	GO:0003735 - structural constituent of ribosome /// GO:0044822 - poly(A) RNA binding	GO:0006412 - translation	24769	17	24769	8.18141	0.0818224	8.26314	7.927	8.37451	0.509908	0.428086	2	8.6993	0.0098144	0.0102278	97.7728	8	0.0509908	1	0.839535	21.8091	0.000408241	3.38908	8.18822	0.232972	0.32159	-1.12123	0.79964	0.336137	-0.111373	-0.44751	4.44249	-1.47193	-6.38831	0.00175849	0.176268	0.000147399
67442_at	Retsat	retinol saturase (all trans retinol 13,1	Mm.305108	ENSMUSG00000056666	1.3.99.23	6	72598628	67442	NM_026159 /// NP_080435	00830 : Retinol metabolism	GO:0005640 - nuclear outer membrane /// GO:0005789 - endoplasmic reticulum membrane /// GO:0031965 - nuclear membrane /// GO:0005783 - endoplasmic reticulum /// GO:0016020 - membrane	GO:0016491 - oxidoreductase activity /// GO:0051786 - all-trans-retinol 13,14-reductase activity	GO:0055114 - oxidation-reduction process /// GO:0042572 - retinol metabolic process	19508	20	19508	7.09193	0.0874496	7.12388	6.78638	7.37354	0.781168	0.693718	2	8.6993	0.0104613	0.0109312	91.4813	8	0.0781168	1	0.888053	33.1565	8.51639e-05	4.06974	7.0946	0.294672	0.0993634	-1.04597	0.946609	0.337499	-0.24966	-0.587158	4.32038	-3.19594	-8.11855	0.00209168	0.0113849	2.40907e-05
109785_at	Pgm3	phosphoglucomutase 3	Mm.390201	ENSMUSG00000056131	5.4.2.3	9	-86552476	109785	NM_001163746 /// NM_028352 /// NP_001157218 /// NP_082628	00520 : Amino sugar and nucleotide sugar metabolism	GO:0005829 - cytosol	GO:0004614 - phosphoglucomutase activity /// GO:0004610 - phosphoacetylglucosamine mutase activity /// GO:0000287 - magnesium ion binding /// GO:0046872 - metal ion binding /// GO:0016853 - isomerase activity /// GO:0016868 - intramolecular transferase activity, phosphotransferases /// GO:0004610 - phosphoacetylglucosamine mutase activity	GO:0019255 - glucose 1-phosphate metabolic process /// GO:0006048 - UDP-N-acetylglucosamine biosynthetic process /// GO:0007283 - spermatogenesis /// GO:0009790 - embryo development /// GO:0030097 - hemopoiesis /// GO:0005975 - carbohydrate metabolic process	3151	22	3151	5.16423	0.195778	5.54522	5.19751	4.84521	1.04275	0.846968	2	8.6993	0.0229138	0.0244722	40.8627	8	0.104275	1	0.812248	18.4816	0.000737769	3.13208	5.19598	0.350004	0.997809	0.00436841	-1.00218	0.347708	0.700003	0.352295	3.00752	6.05471	3.29134	0.0153457	0.000217411	0.00980043
98660_at	Atp1a2	ATPase, Na+/K+ transporting, alpha 2 pol	Mm.207432	ENSMUSG00000007097	3.6.3.9	1	-172271709	98660	NM_178405 /// NP_848492	04260 : Cardiac muscle contraction /// 04960 : Aldosterone-regulated sodium reabsorption /// 04964 : Proximal tubule bicarbonate reclamation /// 04970 : Salivary secretion /// 04971 : Gastric acid secretion /// 04972 : Pancreatic secretion /// 04973 : Carbohydrate digestion and absorption /// 04974 : Protein digestion and absorption /// 04976 : Bile secretion	GO:0030315 - T-tubule /// GO:0042383 - sarcolemma /// GO:0005829 - cytosol /// GO:0005623 - cell /// GO:0016021 - integral component of membrane /// GO:0016020 - membrane /// GO:0005886 - plasma membrane /// GO:0005737 - cytoplasm /// GO:0005768 - endosome /// GO:0005890 - sodium:potassium-exchanging ATPase complex /// GO:0005901 - caveola /// GO:0043005 - neuron projection /// GO:0030315 - T-tub…	GO:0005515 - protein binding /// GO:0000166 - nucleotide binding /// GO:0046872 - metal ion binding /// GO:0015077 - monovalent inorganic cation transmembrane transporter activity /// GO:0016787 - hydrolase activity /// GO:0016820 - hydrolase activity, acting on acid anhydrides, catalyzing transmembrane movement of substances /// GO:0051087 - chaperone binding /// GO:0019829 - cation-transporting…	GO:0001504 - neurotransmitter uptake /// GO:0002026 - regulation of the force of heart contraction /// GO:0002087 - regulation of respiratory gaseous exchange by neurological system process /// GO:0006937 - regulation of muscle contraction /// GO:0006940 - regulation of smooth muscle contraction /// GO:0006942 - regulation of striated muscle contraction /// GO:0008344 - adult locomotory behavior …	24899	9	24899	7.68348	0.122868	7.75479	7.4021	7.91138	0.662573	0.539705	2	8.6993	0.0145327	0.0153585	65.1103	8	0.0662573	1	0.814559	18.5686	0.000725667	3.13926	7.68942	0.260856	0.2506	-1.10147	0.850866	0.352694	-0.156583	-0.509277	3.8306	-1.70064	-5.97442	0.00428616	0.124389	0.000239233
233204_at	Tbc1d17	TBC1 domain family, member 17	Mm.27567	ENSMUSG00000038520	NA	7	-44840776	233204	NM_001042655 /// NM_144924 /// NP_001036120 /// XR_391338	---	GO:0031410 - cytoplasmic vesicle /// GO:0005829 - cytosol	GO:0003674 - molecular_function /// GO:0005096 - GTPase activator activity /// GO:0005097 - Rab GTPase activator activity	GO:0006810 - transport /// GO:0006914 - autophagy /// GO:0015031 - protein transport /// GO:0032313 - regulation of Rab GTPase activity /// GO:0042147 - retrograde transport, endosome to Golgi	10821	27	10821	6.07386	0.0242286	6.24737	5.88696	6.13062	0.267149	0.24292	2	8.6993	0.00319389	0.00302857	330.189	8	0.0267149	1	0.909307	38.0289	5.00653e-05	4.30046	6.08831	0.183888	0.864939	-1.09497	0.230034	0.360403	0.116751	-0.243652	8.3497	2.70485	-6.09714	1.93527e-05	0.0249308	0.000206765
14237_at	Foxd4	forkhead box D4	Mm.377080	ENSMUSG00000051490	NA	19	-24898965	14237	NM_008022 /// NP_032048	---	GO:0005667 - transcription factor complex /// GO:0005634 - nucleus	GO:0003690 - double-stranded DNA binding /// GO:0003705 - RNA polymerase II distal enhancer sequence-specific DNA binding transcription factor activity /// GO:0008134 - transcription factor binding /// GO:0008301 - DNA binding, bending /// GO:0003677 - DNA binding /// GO:0003700 - sequence-specific DNA binding transcription factor activity /// GO:0043565 - sequence-specific DNA binding	GO:0000122 - negative regulation of transcription from RNA polymerase II promoter /// GO:0001829 - trophectodermal cell differentiation /// GO:0001892 - embryonic placenta development /// GO:0006366 - transcription from RNA polymerase II promoter /// GO:0007389 - pattern specification process /// GO:0009888 - tissue development /// GO:0007422 - peripheral nervous system development /// GO:0045944…	4964	24	4964	2.84131	0.0221111	3.01383	2.64868	2.90454	0.275821	0.25371	2	8.6993	0.00295048	0.00276389	361.809	8	0.0275821	1	0.919835	42.9947	3.09189e-05	4.50978	2.85569	0.187415	0.843844	-1.10452	0.26068	0.365153	0.109294	-0.255859	8.80177	2.63445	-6.66147	1.27845e-05	0.027929	0.000108322
233489_at	Picalm	phosphatidylinositol binding clathrin as	Mm.235175; Mm.393563	ENSMUSG00000039361	NA	7	90130232	233489	NM_001252520 /// NM_001252521 /// NM_001252522 /// NM_001252523 /// NM_001252524 /// NM_146194 /// NP_001239449 /// NP_001239450 /// NP_001239451 /// NP_001239452 /// NP_001239453 /// NP_666306 /// XM_006507594 /// XM_006507595 /// XM_006507596 /// XM_006507597 /// XM_006507598 /// XM_006507599 /// XM_006507600 /// XM_006507601 /// XM_006507602 /// XM_006507603 /// XM_006507604 /// XM_006507605 /…	---	GO:0005622 - intracellular /// GO:0005905 - coated pit /// GO:0048471 - perinuclear region of cytoplasm /// GO:0005794 - Golgi apparatus /// GO:0030118 - clathrin coat /// GO:0031410 - cytoplasmic vesicle /// GO:0005886 - plasma membrane /// GO:0016020 - membrane /// GO:0005634 - nucleus /// GO:0005768 - endosome /// GO:0043231 - intracellular membrane-bounded organelle /// GO:0005905 - coated pi…	GO:0005543 - phospholipid binding /// GO:0005545 - 1-phosphatidylinositol binding /// GO:0042802 - identical protein binding /// GO:0017124 - SH3 domain binding /// GO:0030276 - clathrin binding /// GO:0032050 - clathrin heavy chain binding /// GO:0035615 - clathrin adaptor activity	GO:0006898 - receptor-mediated endocytosis /// GO:0007409 - axonogenesis /// GO:0030097 - hemopoiesis /// GO:0048813 - dendrite morphogenesis /// GO:0006897 - endocytosis /// GO:0007275 - multicellular organismal development /// GO:0016192 - vesicle-mediated transport /// GO:0006898 - receptor-mediated endocytosis /// GO:0007409 - axonogenesis /// GO:0008283 - cell proliferation /// GO:0010629 - …	10843	32	10843	9.32804	0.0574316	9.61494	9.24902	9.19189	0.403481	0.346049	2	8.6993	0.00701063	0.00717895	139.296	8	0.0403481	1	0.85766	24.6803	0.000259527	3.58582	9.35195	0.229537	1.14572	-0.448419	-0.697306	0.365915	0.423044	0.0571289	5.72194	6.61528	0.964922	0.000324974	0.000114041	0.360639
54366_at	Ctnnal1	catenin (cadherin associated protein), a	Mm.218891	ENSMUSG00000038816	NA	4	-56810935	54366	NM_018761 /// NP_061231 /// XM_006538091 /// XM_006538092 /// XP_006538154 /// XP_006538155 /// XR_390331	---	GO:0005886 - plasma membrane /// GO:0016020 - membrane /// GO:0005737 - cytoplasm /// GO:0005856 - cytoskeleton /// GO:0005829 - cytosol	GO:0051015 - actin filament binding /// GO:0045296 - cadherin binding	GO:0007155 - cell adhesion /// GO:0007266 - Rho protein signal transduction	16495	21	16495	6.62736	0.151814	6.55782	6.18945	7.11743	1.89405	1.74224	2	8.6993	0.0178601	0.0189767	52.6961	8	0.189405	1	0.919847	48.7747	1.8734e-05	4.72737	6.62157	0.467262	-0.136423	-0.924785	1.06121	0.368371	-0.559607	-0.927979	3.60899	-5.48256	-9.82	0.00599464	0.00043793	5.3394e-06
17929_at	Myom1	myomesin 1	Mm.4103	ENSMUSG00000024049	NA	17	71019557	17929	NM_001083934 /// NM_010867 /// NP_001077403 /// NP_034997 /// XM_006523787 /// XM_006523788 /// XP_006523850 /// XP_006523851 /// XR_385297	---	GO:0005856 - cytoskeleton /// GO:0030017 - sarcomere /// GO:0031430 - M band /// GO:0005737 - cytoplasm /// GO:0032982 - myosin filament	GO:0005200 - structural constituent of cytoskeleton /// GO:0042803 - protein homodimerization activity /// GO:0042802 - identical protein binding	GO:0006936 - muscle contraction	6626	26	6626	9.64645	0.080534	9.72775	9.35889	9.87305	0.636516	0.555982	2	8.6993	0.00966629	0.0100667	99.337	8	0.0636516	1	0.873477	28.7588	0.000146504	3.83415	9.65323	0.265057	0.281146	-1.11048	0.829333	0.368859	-0.145301	-0.51416	4.91216	-1.93499	-7.39577	0.000920707	0.0861073	4.93846e-05
22145_at	Tuba4a	tubulin, alpha 4A	Mm.1155	ENSMUSG00000026202	NA	1	-75214974	22145	NM_009447 /// NP_033473 /// XM_006496478 /// XP_006496541	04145 : Phagosome /// 04540 : Gap junction	GO:0005737 - cytoplasm /// GO:0005856 - cytoskeleton /// GO:0043234 - protein complex /// GO:0005874 - microtubule /// GO:0070062 - extracellular vesicular exosome	GO:0000166 - nucleotide binding /// GO:0003924 - GTPase activity /// GO:0005200 - structural constituent of cytoskeleton /// GO:0005525 - GTP binding	GO:0007017 - microtubule-based process /// GO:0006184 - GTP catabolic process /// GO:0051258 - protein polymerization	9513	12	9513	10.7001	0.114443	10.7858	10.415	10.9209	0.656527	0.542084	2	8.6993	0.0135642	0.0143054	69.9035	8	0.0656527	1	0.825684	19.9821	0.000559352	3.25232	10.7072	0.26192	0.299935	-1.11564	0.815708	0.370768	-0.135091	-0.505859	4.16818	-1.5187	-6.14253	0.00260454	0.16431	0.000196001
20667_at	Sox12	SRY (sex determining region Y)-box 12	Mm.28424	ENSMUSG00000051817	NA	2	-152393612	20667	NM_011438 /// NP_035568	---	GO:0032993 - protein-DNA complex /// GO:0005634 - nucleus	GO:0000976 - transcription regulatory region sequence-specific DNA binding /// GO:0001077 - RNA polymerase II core promoter proximal region sequence-specific DNA binding transcription factor activity involved in positive regulation of transcription /// GO:0001105 - RNA polymerase II transcription coactivator activity /// GO:0003677 - DNA binding	GO:0006366 - transcription from RNA polymerase II promoter /// GO:0021510 - spinal cord development /// GO:0045944 - positive regulation of transcription from RNA polymerase II promoter /// GO:0065004 - protein-DNA complex assembly /// GO:0006351 - transcription, DNA-templated /// GO:0006355 - regulation of transcription, DNA-templated	8039	20	8039	3.25249	0.0426137	3.41831	3.04358	3.33704	0.328269	0.285655	2	8.6993	0.00530729	0.00532671	187.733	8	0.0328269	1	0.870187	26.9116	0.000188061	3.7257	3.26631	0.197123	0.771097	-1.1299	0.358802	0.37473	0.0812729	-0.293457	6.73478	1.46067	-5.6967	9.98777e-05	0.179261	0.000335236
13682_at	Eif4a2	eukaryotic translation initiation factor	Mm.260084	ENSMUSG00000022884	NA	16	23107479	13682	NM_001123037 /// NM_001123038 /// NM_013506 /// NP_001116509 /// NP_001116510 /// NP_038534 /// NR_110335 /// XM_006521783 /// XM_006521784 /// XM_006521785 /// XP_006521846 /// XP_006521847 /// XP_006521848 /// XR_384524 /// XR_384525 /// XR_384526	03013 : RNA transport	---	GO:0000166 - nucleotide binding /// GO:0003676 - nucleic acid binding /// GO:0003723 - RNA binding /// GO:0003743 - translation initiation factor activity /// GO:0004386 - helicase activity /// GO:0005524 - ATP binding /// GO:0016787 - hydrolase activity /// GO:0044822 - poly(A) RNA binding	GO:0006412 - translation /// GO:0006413 - translational initiation	4680	15	4680	7.47803	0.13189	7.55617	7.18091	7.71655	0.730904	0.599014	2	8.6993	0.0155698	0.0164863	60.6564	8	0.0730904	1	0.819552	19.2364	0.000640446	3.19352	7.48454	0.274911	0.260536	-1.10448	0.843945	0.375259	-0.160386	-0.535645	3.9376	-1.68293	-6.07086	0.00365386	0.127846	0.00021329
78194_at	4930546K05Rik	RIKEN cDNA 4930546K05 gene	Mm.251457; Mm.416941	NA	NA	9	-42182238	78194	NR_040754	---	-----	-----	-----	24152	19	24152	3.91572	0.0614111	4.14915	3.76892	3.88745	0.314273	0.252862	2	8.6993	0.00746808	0.00767638	130.27	8	0.0314273	1	0.804593	16.9295	0.00100211	2.99909	3.93517	0.194554	1.09982	-0.854532	-0.24529	0.380227	0.261697	-0.11853	5.76076	3.96493	-1.93972	0.000309853	0.00350877	0.0854631
12036_at	Bcat2	branched chain aminotransferase 2, mitoc	Mm.24210	ENSMUSG00000030826	2.6.1.42	7	45570153; 45571279; 45572870	12036	NM_001243052 /// NM_001243053 /// NM_009737 /// NP_001229981 /// NP_001229982 /// NP_033867 /// XM_006540585 /// XM_006540586 /// XM_006540587 /// XP_006540648 /// XP_006540649 /// XP_006540650	00280 : Valine, leucine and isoleucine degradation /// 00290 : Valine, leucine and isoleucine biosynthesis /// 00770 : Pantothenate and CoA biosynthesis /// 01100 : Metabolic pathways	GO:0005739 - mitochondrion /// GO:0005739 - mitochondrion /// GO:0005634 - nucleus /// GO:0005737 - cytoplasm	GO:0004084 - branched-chain-amino-acid transaminase activity /// GO:0003824 - catalytic activity /// GO:0008483 - transaminase activity /// GO:0016740 - transferase activity /// GO:0052654 - L-leucine transaminase activity /// GO:0052655 - L-valine transaminase activity /// GO:0052656 - L-isoleucine transaminase activity /// GO:0004084 - branched-chain-amino-acid transaminase activity	GO:0006549 - isoleucine metabolic process /// GO:0006550 - isoleucine catabolic process /// GO:0006551 - leucine metabolic process /// GO:0006573 - valine metabolic process /// GO:0009081 - branched-chain amino acid metabolic process /// GO:0009083 - branched-chain amino acid catabolic process /// GO:0010817 - regulation of hormone levels /// GO:0008152 - metabolic process /// GO:0008652 - cellul…	3815	24	3815	6.59353	0.0747544	6.68996	6.30615	6.80859	0.618002	0.543247	2	8.6993	0.00900192	0.0093443	107.017	8	0.0618002	1	0.879039	30.174	0.00012212	3.91321	6.60157	0.262624	0.33656	-1.12486	0.7883	0.383804	-0.118638	-0.502441	5.29643	-1.63718	-7.48915	0.000555283	0.137186	4.48779e-05
68465_at	Adipor2	adiponectin receptor 2	Mm.291826	ENSMUSG00000030168	NA	6	-119353150	68465	NM_197985 /// NP_932102 /// XM_006506538 /// XP_006506601	04920 : Adipocytokine signaling pathway	GO:0005886 - plasma membrane /// GO:0005886 - plasma membrane /// GO:0016021 - integral component of membrane /// GO:0016020 - membrane	GO:0042562 - hormone binding /// GO:0004872 - receptor activity /// GO:0042802 - identical protein binding /// GO:0046982 - protein heterodimerization activity /// GO:0055100 - adiponectin binding /// GO:0042562 - hormone binding	GO:0009755 - hormone-mediated signaling pathway /// GO:0019395 - fatty acid oxidation /// GO:0033211 - adiponectin-activated signaling pathway /// GO:0033211 - adiponectin-activated signaling pathway /// GO:0006629 - lipid metabolic process /// GO:0006631 - fatty acid metabolic process /// GO:0046326 - positive regulation of glucose import /// GO:0030308 - negative regulation of cell growth	20128	25	20128	7.19022	0.0661384	7.33354	6.94971	7.32324	0.429926	0.363788	2	8.6993	0.0080115	0.0082673	120.958	8	0.0429926	1	0.846163	22.7041	0.000352666	3.45264	7.20216	0.218694	0.600735	-1.15438	0.553645	0.383833	0.0102983	-0.373535	5.61471	0.150643	-5.90187	0.000371076	0.883692	0.00026102
23999_at	Twf2	twinfilin, actin-binding protein, homolo	Mm.274346	ENSMUSG00000023277	NA	9	106203108	23999	NM_011876 /// NP_036006	---	GO:0030016 - myofibril /// GO:0030027 - lamellipodium /// GO:0030175 - filopodium /// GO:0032420 - stereocilium /// GO:0048471 - perinuclear region of cytoplasm /// GO:0005622 - intracellular /// GO:0005856 - cytoskeleton /// GO:0042995 - cell projection /// GO:0030426 - growth cone /// GO:0070062 - extracellular vesicular exosome /// GO:0005737 - cytoplasm	GO:0003785 - actin monomer binding /// GO:0005546 - phosphatidylinositol-4,5-bisphosphate binding /// GO:0003779 - actin binding /// GO:0005080 - protein kinase C binding /// GO:0005524 - ATP binding /// GO:0044822 - poly(A) RNA binding /// GO:0005080 - protein kinase C binding /// GO:0005524 - ATP binding	GO:0051016 - barbed-end actin filament capping /// GO:0042989 - sequestering of actin monomers /// GO:0030837 - negative regulation of actin filament polymerization /// GO:0032532 - regulation of microvillus length /// GO:0007275 - multicellular organismal development /// GO:0030030 - cell projection organization /// GO:0010592 - positive regulation of lamellipodium assembly /// GO:0010976 - posi…	11475	23	11475	9.97072	0.0384692	10.1967	9.80957	9.9624	0.295788	0.257319	2	8.6993	0.00483088	0.00480866	207.958	8	0.0295788	1	0.869943	26.6327	0.000195535	3.70877	9.98955	0.194974	1.06232	-0.923088	-0.139231	0.387103	0.234271	-0.152832	7.29215	4.41314	-3.10968	5.49758e-05	0.00183301	0.0130469
208104_at	Mlxip	MLX interacting protein	Mm.83277	ENSMUSG00000038342	NA	5	123394819; 123394819	208104	NM_133917 /// NM_177582 /// NP_598678 /// NP_808250 /// XM_006530239 /// XP_006530302	---	GO:0005634 - nucleus /// GO:0005737 - cytoplasm /// GO:0016020 - membrane /// GO:0005739 - mitochondrion /// GO:0005741 - mitochondrial outer membrane	GO:0005515 - protein binding /// GO:0003677 - DNA binding /// GO:0046983 - protein dimerization activity	GO:0006913 - nucleocytoplasmic transport /// GO:0006351 - transcription, DNA-templated /// GO:0006355 - regulation of transcription, DNA-templated /// GO:1900402 - regulation of carbohydrate metabolic process by regulation of transcription from RNA polymerase II promoter	8183	30	8182	6.32681	0.0545218	6.57721	6.1897	6.27612	0.328095	0.273573	2	8.6993	0.00667615	0.00681522	146.73	8	0.0328095	1	0.833823	20.4889	0.000511382	3.29125	6.34768	0.203423	1.12835	-0.776602	-0.351744	0.38751	0.301085	-0.0864258	6.20958	4.82467	-1.49588	0.000181204	0.00103613	0.170053
13618_at	Ednrb	endothelin receptor type B	Mm.229532	ENSMUSG00000022122	NA	14	-103814615; -103814615	13618	NM_001136061 /// NM_001276296 /// NM_007904 /// NP_001129533 /// NP_001263225 /// NP_031930 /// XM_006518515 /// XP_006518578	04020 : Calcium signaling pathway /// 04080 : Neuroactive ligand-receptor interaction /// 04916 : Melanogenesis	GO:0016021 - integral component of membrane /// GO:0005886 - plasma membrane /// GO:0016020 - membrane /// GO:0005829 - cytosol /// GO:0031965 - nuclear membrane /// GO:0045121 - membrane raft	GO:0004962 - endothelin receptor activity /// GO:0004962 - endothelin receptor activity /// GO:0005515 - protein binding /// GO:0004871 - signal transducer activity /// GO:0004930 - G-protein coupled receptor activity /// GO:0004962 - endothelin receptor activity /// GO:0017046 - peptide hormone binding /// GO:0031702 - type 1 angiotensin receptor binding	GO:0000122 - negative regulation of transcription from RNA polymerase II promoter /// GO:0007186 - G-protein coupled receptor signaling pathway /// GO:0014043 - negative regulation of neuron maturation /// GO:0030318 - melanocyte differentiation /// GO:0035645 - enteric smooth muscle cell differentiation /// GO:0048484 - enteric nervous system development /// GO:0001755 - neural crest cell migrat…	4645	27	4645	7.45098	0.0565955	7.72976	7.34082	7.35205	0.377437	0.320841	2	8.6993	0.00691453	0.00707444	141.354	8	0.0377437	1	0.850053	23.2005	0.00032585	3.48698	7.47421	0.221383	1.15433	-0.602529	-0.5518	0.388938	0.377708	-0.0112305	6.12408	5.94725	-0.190999	0.000200299	0.000247151	0.852909
14732_at	Gpam	glycerol-3-phosphate acyltransferase, mi	Mm.210196	ENSMUSG00000024978	2.3.1.15	19	-55069734	14732	NM_008149 /// NP_032175 /// XM_006526692 /// XM_006526693 /// XM_006526694 /// XP_006526755 /// XP_006526756 /// XP_006526757 /// XR_386442	00561 : Glycerolipid metabolism /// 00564 : Glycerophospholipid metabolism /// 01100 : Metabolic pathways	GO:0005739 - mitochondrion /// GO:0005743 - mitochondrial inner membrane /// GO:0005739 - mitochondrion /// GO:0005886 - plasma membrane /// GO:0016021 - integral component of membrane /// GO:0016020 - membrane /// GO:0005741 - mitochondrial outer membrane /// GO:0031966 - mitochondrial membrane	GO:0004366 - glycerol-3-phosphate O-acyltransferase activity /// GO:0004366 - glycerol-3-phosphate O-acyltransferase activity /// GO:0008374 - O-acyltransferase activity /// GO:0016740 - transferase activity /// GO:0016746 - transferase activity, transferring acyl groups /// GO:0004366 - glycerol-3-phosphate O-acyltransferase activity	GO:0006631 - fatty acid metabolic process /// GO:0006637 - acyl-CoA metabolic process /// GO:0006641 - triglyceride metabolic process /// GO:0006650 - glycerophospholipid metabolic process /// GO:0009749 - response to glucose /// GO:0040018 - positive regulation of multicellular organism growth /// GO:0042104 - positive regulation of activated T cell proliferation /// GO:0050707 - regulation of c…	5238	21	5238	8.97685	0.221863	8.99976	8.59668	9.33984	1.32861	1.10675	2	8.6993	0.0259123	0.0277328	36.0583	8	0.132861	1	0.833012	21.3557	0.000440497	3.35606	8.97876	0.372027	0.0564503	-1.02703	0.970579	0.403084	-0.34008	-0.743164	3.27857	-2.76612	-6.529	0.00999857	0.0225883	0.000125633
70598_at	Filip1	filamin A interacting protein 1	Mm.23049	ENSMUSG00000034898	NA	9	-79815562	70598	NM_001081243 /// NP_001074712 /// XM_006511442 /// XM_006511443 /// XM_006511444 /// XP_006511505 /// XP_006511506 /// XP_006511507	---	GO:0005575 - cellular_component	GO:0003674 - molecular_function	GO:0008150 - biological_process	21078	24	21078	6.51713	0.0806412	6.63542	6.23193	6.71362	0.602402	0.521761	2	8.6993	0.00967862	0.0100801	99.2049	8	0.0602402	1	0.866134	26.9543	0.000186947	3.72828	6.52699	0.258502	0.419438	-1.14141	0.721975	0.403483	-0.0782064	-0.481689	5.36983	-1.04082	-6.92429	0.000505365	0.326018	8.12098e-05
71707_at	Ubiad1	UbiA prenyltransferase domain containing	Mm.292503	ENSMUSG00000047719	NA	4	-148434497	71707	NM_027873 /// NP_082149	---	GO:0016021 - integral component of membrane /// GO:0005739 - mitochondrion /// GO:0005794 - Golgi apparatus /// GO:0016020 - membrane /// GO:0005783 - endoplasmic reticulum /// GO:0005634 - nucleus /// GO:0005737 - cytoplasm /// GO:0030173 - integral component of Golgi membrane	GO:0004661 - protein geranylgeranyltransferase activity /// GO:0008318 - protein prenyltransferase activity /// GO:0008412 - 4-hydroxybenzoate octaprenyltransferase activity /// GO:0008495 - protoheme IX farnesyltransferase activity /// GO:0016740 - transferase activity /// GO:0043888 - (S)-2,3-di-O-geranylgeranylglyceryl phosphate synthase activity /// GO:0043918 - cadaverine aminopropyltransfer…	GO:0006744 - ubiquinone biosynthetic process /// GO:0009234 - menaquinone biosynthetic process /// GO:0042371 - vitamin K biosynthetic process	21490	26	21490	6.32554	0.0260558	6.55759	6.15308	6.32397	0.306579	0.280523	2	8.6993	0.00340393	0.00325698	307.033	8	0.0306579	1	0.915011	41.2058	3.65582e-05	4.43702	6.34488	0.203064	1.04749	-0.944544	-0.102947	0.404511	0.233613	-0.170898	9.07783	5.24262	-4.1425	1.00095e-05	0.000595276	0.00270358
70478_at	Mipep	mitochondrial intermediate peptidase	Mm.274650; Mm.486410	ENSMUSG00000021993	NA	14	60784566; 60784566	70478	NM_027436 /// NP_081712 /// NR_040642 /// XM_006519508 /// XP_006519571	---	GO:0005739 - mitochondrion /// GO:0005739 - mitochondrion	GO:0003674 - molecular_function /// GO:0004222 - metalloendopeptidase activity /// GO:0008237 - metallopeptidase activity /// GO:0008233 - peptidase activity /// GO:0046872 - metal ion binding /// GO:0016787 - hydrolase activity	GO:0008150 - biological_process /// GO:0006508 - proteolysis	21036	36	21036	7.56302	0.0257631	7.64938	7.24414	7.81714	0.713181	0.687418	2	8.6993	0.00337028	0.00322039	310.522	8	0.0713181	1	0.963876	101.982	9.15749e-07	6.03822	7.57022	0.294588	0.268726	-1.10691	0.83818	0.405244	-0.167754	-0.572998	9.13955	-3.7834	-13.9584	9.48458e-06	0.00460115	2.96539e-07
11520_at	Plin2	perilipin 2	Mm.381	ENSMUSG00000028494	NA	4	-86656565	11520	NM_007408 /// NP_031434 /// XM_006537557 /// XP_006537620	---	GO:0005886 - plasma membrane /// GO:0005829 - cytosol /// GO:0005634 - nucleus /// GO:0005737 - cytoplasm /// GO:0005811 - lipid particle /// GO:0016020 - membrane /// GO:0005811 - lipid particle	GO:0005515 - protein binding	GO:0015909 - long-chain fatty acid transport /// GO:0019915 - lipid storage	3464	12	3464	8.20359	0.0712419	8.46656	8.05664	8.15332	0.375186	0.303945	2	8.6993	0.00859815	0.00890524	112.293	8	0.0375186	1	0.810116	17.675	0.000862718	3.06413	8.22551	0.214282	1.12494	-0.788058	-0.336877	0.40992	0.31324	-0.0966797	5.78812	4.42299	-1.47451	0.000299657	0.00180763	0.175589
72958_at	Zfp493	zinc finger protein 493	Mm.53849	ENSMUSG00000090659	NA	13	67779693	72958	NM_028402 /// NP_082678	---	GO:0005575 - cellular_component	GO:0003674 - molecular_function /// GO:0046872 - metal ion binding	GO:0008150 - biological_process	22197	11	22197	4.04571	0.397858	4.57466	4.16394	3.53076	2.35383	1.95597	2	8.6993	0.0461432	0.0497322	20.1077	8	0.235383	1	0.830974	21.1946	0.00045271	3.34418	4.08979	0.525886	0.922014	0.141004	-1.06302	0.410722	1.0439	0.633179	2.50343	6.36278	4.16857	0.0345149	0.000151774	0.00260304
666794_at	Rbm24	RNA binding motif protein 24	Mm.38269	ENSMUSG00000038132	NA	13	46418300	666794	NM_001081425 /// NP_001074894 /// XR_382235	---	GO:0005575 - cellular_component /// GO:0005634 - nucleus /// GO:0005737 - cytoplasm	GO:0003730 - mRNA 3'-UTR binding /// GO:0000166 - nucleotide binding /// GO:0003676 - nucleic acid binding /// GO:0003723 - RNA binding	GO:0010830 - regulation of myotube differentiation /// GO:0043488 - regulation of mRNA stability /// GO:0030154 - cell differentiation	18806	22	18805	7.91177	0.0599502	8.07135	7.65479	8.04907	0.475918	0.415968	2	8.6993	0.00730015	0.00749377	133.444	8	0.0475918	1	0.874033	28.4904	0.000151785	3.81877	7.92507	0.234337	0.624228	-1.1534	0.529168	0.416563	0.022276	-0.394287	6.38347	0.34136	-6.52622	0.000148218	0.740933	0.000126028
68692_at	1110028F18Rik	RIKEN cDNA 1110028F18 gene	Mm.416843; Mm.491038	ENSMUSG00000099139	NA	8	106587143	68692	NR_045470	---	-----	-----	-----	20228	14	20228	2.95172	0.0368715	3.23673	2.8186	2.87109	0.377442	0.34057	2	8.6993	0.00464721	0.00460893	216.97	8	0.0377442	1	0.902312	36.6425	5.78589e-05	4.23763	2.97547	0.227769	1.14701	-0.688732	-0.458278	0.418124	0.365634	-0.0524902	8.03065	7.0225	-1.08892	2.62167e-05	7.30698e-05	0.305432
225341_at	Lims2	LIM and senescent cell antigen like doma	Mm.24551	ENSMUSG00000024395	NA	18	31931507	225341	NM_144862 /// NP_659111 /// XM_006525845 /// XM_006525846 /// XP_006525908 /// XP_006525909	---	GO:0005925 - focal adhesion /// GO:0005886 - plasma membrane /// GO:0016020 - membrane /// GO:0030054 - cell junction /// GO:0005925 - focal adhesion	GO:0003674 - molecular_function /// GO:0046872 - metal ion binding /// GO:0008270 - zinc ion binding	GO:0043066 - negative regulation of apoptotic process /// GO:0016337 - single organismal cell-cell adhesion /// GO:0045216 - cell-cell junction organization /// GO:0050680 - negative regulation of epithelial cell proliferation /// GO:2000178 - negative regulation of neural precursor cell proliferation /// GO:2000346 - negative regulation of hepatocyte proliferation /// GO:2001046 - positive regul…	9897	20	9897	8.96312	0.0690162	9.22348	8.80078	8.93018	0.382143	0.313126	2	8.6993	0.00834231	0.00862703	115.915	8	0.0382143	1	0.819397	18.7674	0.000698919	3.15557	8.98481	0.216584	1.10198	-0.849706	-0.252273	0.422704	0.293309	-0.129395	6.05947	4.20459	-2.00349	0.000216188	0.00247066	0.0772169
52639_at	Wipi1	WD repeat domain, phosphoinositide inter	Mm.35817	ENSMUSG00000041895	NA	11	-109573521	52639	NM_145940 /// NP_666052	---	GO:0019898 - extrinsic component of membrane /// GO:0005829 - cytosol /// GO:0034045 - pre-autophagosomal structure membrane /// GO:0016020 - membrane /// GO:0005768 - endosome /// GO:0005794 - Golgi apparatus /// GO:0005856 - cytoskeleton /// GO:0031410 - cytoplasmic vesicle /// GO:0000407 - pre-autophagosomal structure /// GO:0000421 - autophagic vacuole membrane /// GO:0005737 - cytoplasm /// …	GO:0032266 - phosphatidylinositol-3-phosphate binding /// GO:0080025 - phosphatidylinositol-3,5-bisphosphate binding /// GO:0005102 - receptor binding /// GO:0030331 - estrogen receptor binding /// GO:0032266 - phosphatidylinositol-3-phosphate binding /// GO:0050681 - androgen receptor binding /// GO:0080025 - phosphatidylinositol-3,5-bisphosphate binding	GO:0000045 - autophagic vacuole assembly /// GO:0000422 - mitochondrion degradation /// GO:0006497 - protein lipidation /// GO:0006995 - cellular response to nitrogen starvation /// GO:0034497 - protein localization to pre-autophagosomal structure /// GO:0044804 - nucleophagy /// GO:0006914 - autophagy /// GO:0048203 - vesicle targeting, trans-Golgi to endosome	16282	24	16282	8.03323	0.0779537	8.19182	7.76685	8.18066	0.524196	0.446242	2	8.6993	0.00936968	0.00974421	102.625	8	0.0524196	1	0.851289	23.8131	0.000296124	3.52853	8.04644	0.242203	0.600228	-1.15439	0.554166	0.424975	0.0111565	-0.413818	5.74834	0.150906	-6.04592	0.000314607	0.883491	0.000219691
20226_at	Sars	seryl-aminoacyl-tRNA synthetase	Mm.28688	ENSMUSG00000068739	6.1.1.11	3	-108424864	20226	NM_001204979 /// NM_011319 /// NP_001191908 /// NP_035449	00970 : Aminoacyl-tRNA biosynthesis	GO:0005739 - mitochondrion /// GO:0005737 - cytoplasm /// GO:0070062 - extracellular vesicular exosome	GO:0000166 - nucleotide binding /// GO:0004812 - aminoacyl-tRNA ligase activity /// GO:0004828 - serine-tRNA ligase activity /// GO:0005524 - ATP binding /// GO:0016874 - ligase activity	GO:0006412 - translation /// GO:0006418 - tRNA aminoacylation for protein translation /// GO:0006434 - seryl-tRNA aminoacylation	7755	22	7755	7.97646	0.0677118	8.20567	7.77148	8.00952	0.397756	0.330044	2	8.6993	0.00819236	0.00846397	118.148	8	0.0397756	1	0.829765	20.1434	0.000543504	3.2648	7.99556	0.217429	0.966343	-1.03056	0.064218	0.434186	0.196148	-0.238037	6.28077	2.83741	-3.71925	0.000166819	0.0201431	0.00506903
70574_at	Cpm	carboxypeptidase M	Mm.339332	ENSMUSG00000020183	NA	10	117629500	70574	NM_027468 /// NP_081744 /// XM_006514090 /// XP_006514153	---	GO:0005886 - plasma membrane /// GO:0016020 - membrane /// GO:0031225 - anchored component of membrane /// GO:0009986 - cell surface /// GO:0070062 - extracellular vesicular exosome	GO:0003674 - molecular_function /// GO:0004180 - carboxypeptidase activity /// GO:0004181 - metallocarboxypeptidase activity /// GO:0008237 - metallopeptidase activity /// GO:0008233 - peptidase activity /// GO:0046872 - metal ion binding /// GO:0008270 - zinc ion binding /// GO:0016787 - hydrolase activity	GO:0008150 - biological_process /// GO:0006508 - proteolysis	21070	22	21070	4.8379	0.0724372	5.00068	4.56226	4.99146	0.550165	0.477728	2	8.6993	0.00873555	0.00905465	110.441	8	0.0550165	1	0.868336	27.3439	0.000177155	3.75165	4.85146	0.250504	0.595666	-1.1545	0.558838	0.438425	0.00922556	-0.429199	6.14174	0.129238	-6.49425	0.000196182	0.900108	0.000130662
14979_at	H2-Ke6	H2-K region expressed gene 6	Mm.275452	ENSMUSG00000073422	1.1.1.63 /// 1.1.1.62	17	-34026033	14979	NM_013543 /// NP_038571	00140 : Steroid hormone biosynthesis /// 01100 : Metabolic pathways	GO:0005886 - plasma membrane /// GO:0016020 - membrane /// GO:0005739 - mitochondrion /// GO:0005740 - mitochondrial envelope /// GO:0005759 - mitochondrial matrix	GO:0004303 - estradiol 17-beta-dehydrogenase activity /// GO:0047035 - testosterone dehydrogenase (NAD+) activity /// GO:0000252 - C-3 sterol dehydrogenase (C-4 sterol decarboxylase) activity /// GO:0004033 - aldo-keto reductase (NADP) activity /// GO:0004448 - isocitrate dehydrogenase activity /// GO:0004495 - mevaldate reductase activity /// GO:0016491 - oxidoreductase activity /// GO:0008875 -…	GO:0055114 - oxidation-reduction process /// GO:0008209 - androgen metabolic process /// GO:0008210 - estrogen metabolic process /// GO:0008152 - metabolic process /// GO:0006629 - lipid metabolic process /// GO:0006631 - fatty acid metabolic process /// GO:0006633 - fatty acid biosynthetic process /// GO:0006694 - steroid biosynthetic process /// GO:0006703 - estrogen biosynthetic process	5366	25	5366	7.59582	0.0762752	7.82694	7.3877	7.63062	0.414633	0.338358	2	8.6993	0.00917673	0.00953439	104.883	8	0.0414633	1	0.816042	18.4356	0.000744273	3.12827	7.61508	0.220034	0.962837	-1.03342	0.0705857	0.439246	0.196326	-0.24292	6.00351	2.68334	-3.5862	0.000231063	0.0258104	0.00620736
76454_at	Fbxo31	F-box protein 31	Mm.24829	ENSMUSG00000052934	NA	8	-121549443	76454	NM_133765 /// NP_598526 /// XM_006531477 /// XM_006531478 /// XP_006531540 /// XP_006531541	---	GO:0019005 - SCF ubiquitin ligase complex	GO:0030332 - cyclin binding	GO:0007049 - cell cycle /// GO:0006974 - cellular response to DNA damage stimulus /// GO:0008054 - cyclin catabolic process /// GO:0031146 - SCF-dependent proteasomal ubiquitin-dependent protein catabolic process /// GO:0031571 - mitotic G1 DNA damage checkpoint	23657	33	23657	6.89361	0.0628323	7.09168	6.65186	6.98682	0.449056	0.386224	2	8.6993	0.00763145	0.00785404	127.323	8	0.0449056	1	0.860079	25.3048	0.000236581	3.62602	6.91012	0.229724	0.790347	-1.12422	0.333877	0.439823	0.104862	-0.334961	6.59198	1.57165	-5.42257	0.000117052	0.151643	0.000472506
18830_at	Pltp	phospholipid transfer protein	Mm.6105	ENSMUSG00000017754	NA	2	-164839518	18830	NM_011125 /// NP_035255 /// XM_006498952 /// XP_006499015	03320 : PPAR signaling pathway	GO:0005576 - extracellular region /// GO:0005615 - extracellular space	GO:0008289 - lipid binding	GO:0010189 - vitamin E biosynthetic process /// GO:0030317 - sperm motility /// GO:0006810 - transport /// GO:0006869 - lipid transport	7137	29	7137	8.38428	0.0805599	8.59458	8.15332	8.45752	0.448062	0.367502	2	8.6993	0.00966927	0.01007	99.305	8	0.0448062	1	0.820204	19.0036	0.000668682	3.17478	8.40181	0.225843	0.853567	-1.10026	0.24669	0.441258	0.137059	-0.304199	5.8754	1.82496	-4.37498	0.000269499	0.102451	0.00193501
270166_at	Clpx	caseinolytic mitochondrial matrix peptid	Mm.30088	ENSMUSG00000015357	NA	9	65294295	270166	NM_001044389 /// NM_011802 /// NP_001037854 /// NP_035932 /// XR_379423	---	GO:0005739 - mitochondrion /// GO:0005743 - mitochondrial inner membrane /// GO:0005739 - mitochondrion /// GO:0005759 - mitochondrial matrix /// GO:0009368 - endopeptidase Clp complex /// GO:0009841 - mitochondrial endopeptidase Clp complex /// GO:0042645 - mitochondrial nucleoid	GO:0005524 - ATP binding /// GO:0016887 - ATPase activity /// GO:0005515 - protein binding /// GO:0051082 - unfolded protein binding /// GO:0000166 - nucleotide binding /// GO:0046872 - metal ion binding /// GO:0004176 - ATP-dependent peptidase activity /// GO:0016887 - ATPase activity /// GO:0016504 - peptidase activator activity	GO:0006200 - ATP catabolic process /// GO:0006457 - protein folding /// GO:0006200 - ATP catabolic process /// GO:0051603 - proteolysis involved in cellular protein catabolic process /// GO:0010952 - positive regulation of peptidase activity	13502	23	13502	7.69992	0.108595	7.84698	7.40381	7.88574	0.662319	0.553723	2	8.6993	0.012892	0.0135744	73.668	8	0.0662319	1	0.836038	21.4755	0.00043168	3.36484	7.71218	0.267756	0.503444	-1.15167	0.648227	0.443167	-0.0387666	-0.481934	5.11033	-0.447032	-6.00264	0.000707497	0.665773	0.000231304
30878_at	Apln	apelin	Mm.29262	ENSMUSG00000037010	NA	X	-48025146	30878	NM_013912 /// NP_038940	---	GO:0005615 - extracellular space /// GO:0048471 - perinuclear region of cytoplasm	GO:0005179 - hormone activity /// GO:0031704 - apelin receptor binding /// GO:0005102 - receptor binding	GO:0007165 - signal transduction /// GO:0002026 - regulation of the force of heart contraction /// GO:0007631 - feeding behavior /// GO:0008284 - positive regulation of cell proliferation /// GO:0045909 - positive regulation of vasodilation /// GO:0031652 - positive regulation of heat generation /// GO:0042327 - positive regulation of phosphorylation /// GO:0042756 - drinking behavior /// GO:0043…	13905	21	13905	4.93741	0.456963	4.91276	4.46729	5.42603	2.29784	1.84087	2	8.6993	0.0529375	0.0571204	17.5069	8	0.229784	1	0.801133	17.3872	0.000913509	3.03929	4.93536	0.479769	-0.0470988	-0.975618	1.02272	0.445475	-0.513265	-0.95874	2.53503	-2.9208	-5.89297	0.0327957	0.0176238	0.000263838
20194_at	S100a10	S100 calcium binding protein A10 (calpac	Mm.1	ENSMUSG00000041959	NA	3	93555117	20194	NM_009112 /// NP_033138 /// XM_006501168 /// XM_006543794 /// XP_006501231 /// XP_006543857	---	GO:0019897 - extrinsic component of plasma membrane /// GO:0005783 - endoplasmic reticulum /// GO:0045121 - membrane raft /// GO:0070062 - extracellular vesicular exosome	GO:0005515 - protein binding /// GO:0005509 - calcium ion binding /// GO:0042803 - protein homodimerization activity /// GO:0044325 - ion channel binding	GO:0071229 - cellular response to acid chemical /// GO:0051099 - positive regulation of binding /// GO:0001765 - membrane raft assembly /// GO:0006900 - membrane budding /// GO:0032855 - positive regulation of Rac GTPase activity /// GO:0051290 - protein heterotetramerization /// GO:0051496 - positive regulation of stress fiber assembly /// GO:0051894 - positive regulation of focal adhesion assem…	7734	16	7734	9.30656	0.128907	9.67809	9.22998	9.10449	0.729793	0.600886	2	8.6993	0.0152268	0.0161133	62.0604	8	0.0729793	1	0.823365	19.7312	0.000585151	3.23273	9.33752	0.301541	1.12943	-0.356635	-0.772791	0.448109	0.573597	0.125488	4.75467	6.08617	1.43818	0.00113971	0.000209461	0.185367
245007_at	Zbtb38	zinc finger and BTB domain containing 38	Mm.485954	ENSMUSG00000040433	NA	9	-96685423	245007	NM_175537 /// NP_780746 /// XM_006511189 /// XM_006511190 /// XM_006511191 /// XM_006511192 /// XM_006511193 /// XM_006511194 /// XM_006511195 /// XP_006511252 /// XP_006511253 /// XP_006511254 /// XP_006511255 /// XP_006511256 /// XP_006511257 /// XP_006511258	---	GO:0005634 - nucleus /// GO:0072562 - blood microparticle	GO:0046872 - metal ion binding /// GO:0003700 - sequence-specific DNA binding transcription factor activity /// GO:0008327 - methyl-CpG binding /// GO:0042803 - protein homodimerization activity	GO:0045892 - negative regulation of transcription, DNA-templated /// GO:0045944 - positive regulation of transcription from RNA polymerase II promoter	11981	29	11981	6.24581	0.0799399	6.54519	6.09692	6.17017	0.460378	0.380438	2	8.6993	0.009598	0.00999248	100.075	8	0.0460378	1	0.82636	19.8186	0.000575994	3.23958	6.27076	0.240467	1.14123	-0.722907	-0.418324	0.448264	0.375022	-0.0732422	5.99081	5.01197	-1.05727	0.000234593	0.000805749	0.318862
22138_at	Ttn	titin	Mm.373672; Mm.446279; Mm.473358	ENSMUSG00000051747	2.7.11.1	2	-76703984	22138	NM_011652 /// NM_028004 /// NP_035782 /// NP_082280 /// XM_006499157 /// XM_006499158 /// XP_006499220 /// XP_006499221	05410 : Hypertrophic cardiomyopathy (HCM) /// 05414 : Dilated cardiomyopathy	GO:0005859 - muscle myosin complex /// GO:0030017 - sarcomere /// GO:0030018 - Z disc /// GO:0031430 - M band /// GO:0031672 - A band /// GO:0031674 - I band /// GO:0000794 - condensed nuclear chromosome /// GO:0005634 - nucleus /// GO:0005737 - cytoplasm /// GO:0005794 - Golgi apparatus /// GO:0005865 - striated muscle thin filament /// GO:0030016 - myofibril /// GO:0030018 - Z disc /// GO:00314…	GO:0005200 - structural constituent of cytoskeleton /// GO:0005515 - protein binding /// GO:0005509 - calcium ion binding /// GO:0002020 - protease binding /// GO:0051015 - actin filament binding /// GO:0004674 - protein serine/threonine kinase activity /// GO:0005516 - calmodulin binding /// GO:0008307 - structural constituent of muscle /// GO:0042802 - identical protein binding /// GO:0019899 -…	GO:0045214 - sarcomere organization /// GO:0001701 - in utero embryonic development /// GO:0003007 - heart morphogenesis /// GO:0006936 - muscle contraction /// GO:0007512 - adult heart development /// GO:0021591 - ventricular system development /// GO:0043056 - forward locomotion /// GO:0045214 - sarcomere organization /// GO:0055002 - striated muscle cell development /// GO:0055003 - cardiac my…	9507	270	9507	10.3217	0.446345	10.3039	9.85059	10.8062	2.27386	1.82752	2	8.6993	0.0517169	0.0557931	17.9234	8	0.227386	1	0.803706	17.6685	0.00086383	3.06357	10.3202	0.477992	-0.0341025	-0.982513	1.01662	0.453332	-0.502234	-0.955566	2.61001	-2.89156	-5.94237	0.0290534	0.0184682	0.000248605
14870_at	Gstp1	glutathione S-transferase, pi 1	Mm.299292	ENSMUSG00000060803; ENSMUSG00000097830	2.5.1.18	19	-4035411	14870	NM_013541 /// NP_038569	00480 : Glutathione metabolism /// 00980 : Metabolism of xenobiotics by cytochrome P450 /// 00982 : Drug metabolism - cytochrome P450 /// 05215 : Prostate cancer	GO:0005622 - intracellular /// GO:0043234 - protein complex /// GO:0005886 - plasma membrane /// GO:0005622 - intracellular /// GO:0005739 - mitochondrion /// GO:0005829 - cytosol /// GO:0005615 - extracellular space /// GO:0005634 - nucleus /// GO:0005737 - cytoplasm /// GO:0031982 - vesicle /// GO:0070062 - extracellular vesicular exosome /// GO:0097057 - TRAF2-GSTP1 complex	GO:0004364 - glutathione transferase activity /// GO:0019207 - kinase regulator activity /// GO:0008432 - JUN kinase binding /// GO:0016740 - transferase activity /// GO:0004364 - glutathione transferase activity /// GO:0008144 - drug binding /// GO:0035730 - S-nitrosoglutathione binding /// GO:0035731 - dinitrosyl-iron complex binding /// GO:0043295 - glutathione binding	GO:0043066 - negative regulation of apoptotic process /// GO:0000302 - response to reactive oxygen species /// GO:0006749 - glutathione metabolic process /// GO:0009890 - negative regulation of biosynthetic process /// GO:0032691 - negative regulation of interleukin-1 beta production /// GO:0032720 - negative regulation of tumor necrosis factor production /// GO:0032872 - regulation of stress-act…	5320	9	5320	9.26245	0.0705314	9.56581	9.10889	9.18848	0.462836	0.392305	2	8.6993	0.00851648	0.00881643	113.425	8	0.0462836	1	0.84761	23.0321	0.000334657	3.4754	9.28773	0.244097	1.13925	-0.732655	-0.406597	0.456928	0.377338	-0.0795898	6.48275	5.35355	-1.21967	0.000132374	0.000516	0.254624
77462_at	Tmem116	transmembrane protein 116	Mm.358781	ENSMUSG00000029452	NA	5	121452709; 121463181	77462	NM_001161626 /// NM_001161627 /// NM_029912 /// NP_001155098 /// NP_001155099 /// NP_084188 /// XM_006530501 /// XM_006530502 /// XP_006530564 /// XP_006530565 /// XR_387580 /// XR_387581	---	GO:0005575 - cellular_component /// GO:0016021 - integral component of membrane /// GO:0016020 - membrane	GO:0003674 - molecular_function	GO:0008150 - biological_process	23948	26	23948	5.65264	0.0883433	5.78593	5.32446	5.88086	0.780776	0.692432	2	8.6993	0.010564	0.0110429	90.5558	8	0.0780776	1	0.886852	32.7733	8.90553e-05	4.05034	5.66375	0.29764	0.410484	-1.13992	0.729439	0.461463	-0.0949337	-0.556396	5.87847	-1.20934	-7.65571	0.000268501	0.258371	3.79208e-05
77128_at	Crebrf	CREB3 regulatory factor	Mm.275414	ENSMUSG00000048249	NA	17	26715650	77128	NM_029870 /// NP_084146 /// XM_006525114 /// XM_006525115 /// XM_006525116 /// XM_006525117 /// XM_006525118 /// XM_006525119 /// XP_006525177 /// XP_006525178 /// XP_006525179 /// XP_006525180 /// XP_006525181 /// XP_006525182	---	GO:0016604 - nuclear body /// GO:0005634 - nucleus /// GO:0005737 - cytoplasm /// GO:0016604 - nuclear body	GO:0003674 - molecular_function /// GO:0003700 - sequence-specific DNA binding transcription factor activity /// GO:0043565 - sequence-specific DNA binding	GO:1900170 - negative regulation of glucocorticoid mediated signaling pathway /// GO:0042711 - maternal behavior /// GO:1902213 - positive regulation of prolactin signaling pathway /// GO:0042711 - maternal behavior /// GO:0006986 - response to unfolded protein /// GO:0006351 - transcription, DNA-templated /// GO:0006355 - regulation of transcription, DNA-templated /// GO:0006810 - transport /// …	23905	16	23905	7.13503	0.084561	7.42741	6.9624	7.08838	0.468924	0.384363	2	8.6993	0.0101292	0.0105701	94.6062	8	0.0468924	1	0.81967	18.973	0.00067251	3.1723	7.1594	0.2405	1.11439	-0.819102	-0.295292	0.465007	0.33903	-0.125977	6.04941	4.41054	-1.77018	0.000218783	0.00183977	0.111633
17762_at	Mapt	microtubule-associated protein tau	Mm.1287	ENSMUSG00000018411	NA	11	104231436	17762	NM_001038609 /// NM_001285454 /// NM_001285455 /// NM_001285456 /// NM_010838 /// NP_001033698 /// NP_001272383 /// NP_001272384 /// NP_001272385 /// NP_034968 /// XM_006514927 /// XM_006514928 /// XM_006514929 /// XM_006514930 /// XM_006514931 /// XM_006532407 /// XM_006532408 /// XM_006532409 /// XM_006532410 /// XP_006514990 /// XP_006514991 /// XP_006514992 /// XP_006514993 /// XP_006514994 /…	04010 : MAPK signaling pathway /// 05010 : Alzheimer's disease	GO:0005930 - axoneme /// GO:0005634 - nucleus /// GO:0005737 - cytoplasm /// GO:0015630 - microtubule cytoskeleton /// GO:0030424 - axon /// GO:0005622 - intracellular /// GO:0005623 - cell /// GO:0016020 - membrane /// GO:0005856 - cytoskeleton /// GO:0005874 - microtubule /// GO:0042995 - cell projection /// GO:0005886 - plasma membrane /// GO:0043005 - neuron projection /// GO:0030424 - axon /…	GO:0008017 - microtubule binding /// GO:0005515 - protein binding /// GO:0019901 - protein kinase binding /// GO:0015631 - tubulin binding /// GO:0008017 - microtubule binding /// GO:0071813 - lipoprotein particle binding /// GO:0017124 - SH3 domain binding /// GO:0019899 - enzyme binding /// GO:0019901 - protein kinase binding /// GO:0019904 - protein domain specific binding /// GO:0032403 - pro…	GO:0060632 - regulation of microtubule-based movement /// GO:0000226 - microtubule cytoskeleton organization /// GO:0001764 - neuron migration /// GO:0032387 - negative regulation of intracellular transport /// GO:0045773 - positive regulation of axon extension /// GO:0047497 - mitochondrion transport along microtubule /// GO:0048675 - axon extension /// GO:0007409 - axonogenesis /// GO:0007628 -…	6552	34	6552	5.4528	0.0868341	5.61828	5.15259	5.62891	0.65355	0.566716	2	8.6993	0.0103905	0.0108543	92.1297	8	0.065355	1	0.867135	27.2709	0.000178942	3.74729	5.46659	0.271988	0.55771	-1.15448	0.59677	0.465695	-0.0106238	-0.476318	5.9817	-0.13646	-6.60837	0.000237161	0.894564	0.000114926
228003_at	Klhl41	kelch-like 41	Mm.178784	ENSMUSG00000075307	NA	2	69670120	228003	NM_001081087 /// NP_001074556	---	GO:0005737 - cytoplasm /// GO:0005856 - cytoskeleton /// GO:0031430 - M band /// GO:0042995 - cell projection /// GO:0005737 - cytoplasm /// GO:0031143 - pseudopodium /// GO:0031463 - Cul3-RING ubiquitin ligase complex	GO:0003674 - molecular_function	GO:0035914 - skeletal muscle cell differentiation /// GO:0030239 - myofibril assembly /// GO:0045661 - regulation of myoblast differentiation /// GO:2000291 - regulation of myoblast proliferation /// GO:2001014 - regulation of skeletal muscle cell differentiation /// GO:0016567 - protein ubiquitination /// GO:0031275 - regulation of lateral pseudopodium assembly	10252	28	10252	7.57451	0.0724735	7.77222	7.30029	7.70044	0.553959	0.481486	2	8.6993	0.00873972	0.00905918	110.385	8	0.0553959	1	0.869172	27.5458	0.000172329	3.76364	7.59099	0.254293	0.712716	-1.14314	0.430425	0.471931	0.0717847	-0.400146	6.60954	1.00537	-6.0532	0.000114775	0.341863	0.0002178
239017_at	Ogdhl	oxoglutarate dehydrogenase-like	Mm.318302	ENSMUSG00000021913	1.2.4.2	14	32322019	239017	NM_001081130 /// NP_001074599 /// XM_006518951 /// XM_006518952 /// XP_006519014 /// XP_006519015	00020 : Citrate cycle (TCA cycle) /// 00310 : Lysine degradation /// 00380 : Tryptophan metabolism /// 01100 : Metabolic pathways	GO:0005575 - cellular_component	GO:0003674 - molecular_function	GO:0008150 - biological_process	11339	20	11339	6.83357	0.140568	6.95715	6.48242	7.09204	0.946833	0.806265	2	8.6993	0.0165673	0.017571	56.9119	8	0.0946833	1	0.851539	24.333	0.000273477	3.56308	6.84387	0.320208	0.353767	-1.1288	0.775029	0.474728	-0.134891	-0.609619	4.82903	-1.37214	-6.69803	0.00103002	0.204358	0.000104017
100217422_at	Snord13	small nucleolar RNA, C/D box 13	NA	ENSMUSG00000088252	NA	8	NA	100217422	NR_028522	---	GO:0005575 - cellular_component	GO:0003674 - molecular_function	GO:0008150 - biological_process	753	10	753	8.81746	0.607045	9.45176	8.97168	8.1875	3.4966	2.88956	2	8.6993	0.0701897	0.0758806	13.1786	8	0.34966	1	0.82639	20.5839	0.000502955	3.29847	8.87031	0.638198	0.91108	0.15883	-1.06991	0.480084	1.26426	0.78418	2.37259	6.24802	4.18595	0.042648	0.000173274	0.00253826
11459_at	Acta1	actin, alpha 1, skeletal muscle	Mm.214950	ENSMUSG00000031972	NA	8	-123891758	11459	NM_001272041 /// NM_009606 /// NP_001258970 /// NP_033736	---	GO:0005865 - striated muscle thin filament /// GO:0005737 - cytoplasm /// GO:0005856 - cytoskeleton /// GO:0001725 - stress fiber /// GO:0005615 - extracellular space /// GO:0005865 - striated muscle thin filament /// GO:0005884 - actin filament /// GO:0015629 - actin cytoskeleton /// GO:0030017 - sarcomere /// GO:0043234 - protein complex /// GO:0070062 - extracellular vesicular exosome /// GO:0…	GO:0005515 - protein binding /// GO:0000166 - nucleotide binding /// GO:0005524 - ATP binding	GO:0048741 - skeletal muscle fiber development /// GO:0030240 - skeletal muscle thin filament assembly	3381	14	3381	11.8706	0.0529344	12.0342	11.5513	12.0674	0.695962	0.643028	2	8.6993	0.00649367	0.0066168	151.13	8	0.0695962	1	0.923941	49.5119	1.7644e-05	4.7534	11.8843	0.288863	0.518871	-1.15279	0.633918	0.482881	-0.0332327	-0.516113	7.84578	-0.539961	-9.05764	3.13958e-05	0.602769	1.01881e-05
11870_at	Art1	ADP-ribosyltransferase 1	Mm.261071	ENSMUSG00000030996	NA	7	102101743	11870	NM_009710 /// NP_033840 /// XM_006507254 /// XP_006507317 /// XR_378210	---	GO:0009986 - cell surface /// GO:0031225 - anchored component of membrane /// GO:0016020 - membrane /// GO:0016529 - sarcoplasmic reticulum	GO:0003950 - NAD+ ADP-ribosyltransferase activity /// GO:0003956 - NAD(P)+-protein-arginine ADP-ribosyltransferase activity /// GO:0016740 - transferase activity /// GO:0016757 - transferase activity, transferring glycosyl groups	GO:0006471 - protein ADP-ribosylation	3725	21	3725	8.49548	0.100237	8.70543	8.22021	8.61328	0.59107	0.490833	2	8.6993	0.0119312	0.0125297	79.8107	8	0.059107	1	0.830414	20.5693	0.000504241	3.29736	8.51298	0.257692	0.746849	-1.13609	0.389243	0.485218	0.092152	-0.393066	5.81616	1.1046	-5.08907	0.000289585	0.298947	0.000727577
70381_at	Tecpr1	tectonin beta-propeller repeat containin	Mm.239412; Mm.458463	ENSMUSG00000066621	NA	5	-144195347	70381	NM_027410 /// NP_081686 /// XM_006504864 /// XP_006504927	---	GO:0016021 - integral component of membrane /// GO:0016020 - membrane /// GO:0005764 - lysosome /// GO:0031410 - cytoplasmic vesicle /// GO:0000421 - autophagic vacuole membrane /// GO:0005765 - lysosomal membrane	GO:0008289 - lipid binding /// GO:0032266 - phosphatidylinositol-3-phosphate binding	GO:0000046 - autophagic vacuole fusion /// GO:0006914 - autophagy	20996	25	20996	5.54804	0.085573	5.78193	5.29517	5.62549	0.529461	0.443888	2	8.6993	0.0102455	0.0106966	93.4875	8	0.0529461	1	0.838377	21.6625	0.000418339	3.37847	5.56753	0.248504	0.862771	-1.09601	0.233235	0.486765	0.156442	-0.330322	6.29641	2.02362	-4.61515	0.000163826	0.0747764	0.00138105
56190_at	Rbm38	RNA binding motif protein 38	Mm.485782	ENSMUSG00000027510	NA	2	173021902	56190	NM_019547 /// NP_062420 /// XM_006499923 /// XM_006499924 /// XP_006499986 /// XP_006499987	---	GO:0005737 - cytoplasm /// GO:0005829 - cytosol /// GO:0005634 - nucleus	GO:0003729 - mRNA binding /// GO:0000166 - nucleotide binding /// GO:0003676 - nucleic acid binding /// GO:0003723 - RNA binding /// GO:0003729 - mRNA binding /// GO:0003730 - mRNA 3'-UTR binding /// GO:0044822 - poly(A) RNA binding	GO:0010830 - regulation of myotube differentiation /// GO:0006397 - mRNA processing /// GO:0007049 - cell cycle /// GO:0008380 - RNA splicing /// GO:0030154 - cell differentiation /// GO:0006977 - DNA damage response, signal transduction by p53 class mediator resulting in cell cycle arrest /// GO:0006978 - DNA damage response, signal transduction by p53 class mediator resulting in transcription o…	16883	19	16883	7.41061	0.133424	7.5723	7.08545	7.6145	0.801057	0.667632	2	8.6993	0.0157461	0.016678	59.9591	8	0.0801057	1	0.83344	21.1999	0.000452304	3.34457	7.42408	0.294023	0.504087	-1.15172	0.647636	0.486846	-0.0422067	-0.529053	5.0798	-0.440389	-5.96248	0.000736532	0.670394	0.000242679
17347_at	Mknk2	MAP kinase-interacting serine/threonine	Mm.42126; Mm.486332	ENSMUSG00000020190	2.7.11.1	10	-80665330	17347	NM_021462 /// NP_067437 /// XM_006513316 /// XM_006513317 /// XP_006513379 /// XP_006513380	04010 : MAPK signaling pathway /// 04910 : Insulin signaling pathway	GO:0005622 - intracellular /// GO:0005737 - cytoplasm /// GO:0005634 - nucleus	GO:0004674 - protein serine/threonine kinase activity /// GO:0005524 - ATP binding /// GO:0005515 - protein binding /// GO:0000166 - nucleotide binding /// GO:0004672 - protein kinase activity /// GO:0046872 - metal ion binding /// GO:0016301 - kinase activity /// GO:0016740 - transferase activity /// GO:0016772 - transferase activity, transferring phosphorus-containing groups /// GO:0004674 - pr…	GO:0035556 - intracellular signal transduction /// GO:0006468 - protein phosphorylation /// GO:0097192 - extrinsic apoptotic signaling pathway in absence of ligand /// GO:0097192 - extrinsic apoptotic signaling pathway in absence of ligand /// GO:0006915 - apoptotic process /// GO:0006417 - regulation of translation /// GO:0016310 - phosphorylation /// GO:0035556 - intracellular signal transducti…	6469	21	6469	7.71958	0.0983175	7.99296	7.49487	7.73926	0.526044	0.427727	2	8.6993	0.0117105	0.0122897	81.369	8	0.0526044	1	0.8131	18.2625	0.000769384	3.11386	7.74236	0.249056	1.00617	-0.993709	-0.0124662	0.498084	0.253699	-0.244385	6.02637	3.06953	-3.19375	0.000224856	0.0139046	0.0114242
258180_at	Olfr699	olfactory receptor 699	Mm.377371	ENSMUSG00000096714	NA	7	-106790049	258180	NM_001011862 /// NP_001011862	---	GO:0005886 - plasma membrane /// GO:0016020 - membrane /// GO:0016021 - integral component of membrane	GO:0004871 - signal transducer activity /// GO:0004930 - G-protein coupled receptor activity /// GO:0004984 - olfactory receptor activity	GO:0007165 - signal transduction /// GO:0050896 - response to stimulus /// GO:0007186 - G-protein coupled receptor signaling pathway /// GO:0007608 - sensory perception of smell /// GO:0050911 - detection of chemical stimulus involved in sensory perception of smell	12272	10	12272	2.30502	0.0891268	2.59399	2.09229	2.30103	0.52072	0.431594	2	8.6993	0.010654	0.0111408	89.7598	8	0.052072	1	0.828839	20.2549	0.000532871	3.27338	2.3291	0.252026	1.05103	-0.93964	-0.111392	0.501702	0.292961	-0.20874	6.36399	3.71616	-2.85999	0.000151563	0.00509278	0.0194266
20510_at	Slc1a1	solute carrier family 1 (neuronal/epithe	Mm.246670	ENSMUSG00000024935	NA	19	28835166	20510	NM_009199 /// NP_033225	04974 : Protein digestion and absorption	GO:0005886 - plasma membrane /// GO:0016021 - integral component of membrane /// GO:0016020 - membrane /// GO:0070062 - extracellular vesicular exosome	GO:0005313 - L-glutamate transmembrane transporter activity /// GO:0015501 - glutamate:sodium symporter activity /// GO:0005515 - protein binding /// GO:0015293 - symporter activity /// GO:0017153 - sodium:dicarboxylate symporter activity /// GO:0005313 - L-glutamate transmembrane transporter activity /// GO:0016595 - glutamate binding /// GO:0015501 - glutamate:sodium symporter activity	GO:0015813 - L-glutamate transport /// GO:0051260 - protein homooligomerization /// GO:0006810 - transport /// GO:0006835 - dicarboxylic acid transport /// GO:0015813 - L-glutamate transport /// GO:0035725 - sodium ion transmembrane transport /// GO:0051260 - protein homooligomerization /// GO:0051938 - L-glutamate import /// GO:0070779 - D-aspartate import /// GO:1902475 - L-alpha-amino acid tra…	7942	22	7942	4.45003	0.097767	4.79235	4.28979	4.35352	0.589272	0.491505	2	8.6993	0.0116473	0.0122209	81.8272	8	0.0589272	1	0.834088	21.0996	0.000460107	3.33714	4.47855	0.273615	1.14685	-0.689865	-0.456981	0.502552	0.438832	-0.0637207	6.09693	5.32387	-0.834995	0.000206815	0.000536019	0.426057
73338_at	Itpripl1	inositol 1,4,5-triphosphate receptor int	Mm.57559	ENSMUSG00000074825	NA	2	-127138769; -127138769	73338	NM_001163527 /// NM_001163528 /// NP_001156999 /// NP_001157000 /// XM_006500255 /// XM_006500256 /// XP_006500318 /// XP_006500319	---	GO:0016021 - integral component of membrane /// GO:0016020 - membrane	GO:0003674 - molecular_function	GO:0008150 - biological_process	22317	22	22317	6.7443	0.132423	7.13243	6.62915	6.56836	0.76121	0.628788	2	8.6993	0.015631	0.0165528	60.4126	8	0.076121	1	0.826037	20.1135	0.000546401	3.26249	6.77665	0.309612	1.14912	-0.476388	-0.672734	0.503277	0.564068	0.060791	5.27055	5.90718	0.68764	0.000574144	0.000259355	0.509596
54630_at	Prickle3	prickle homolog 3 (Drosophila)	Mm.232232	ENSMUSG00000031145	NA	X	7658533	54630	NM_001290624 /// NM_175097 /// NP_001277553 /// NP_780306 /// XM_006527651 /// XM_006527652 /// XP_006527714 /// XP_006527715	---	GO:0005575 - cellular_component	GO:0046872 - metal ion binding /// GO:0008270 - zinc ion binding	GO:0008150 - biological_process	16708	22	16708	5.63206	0.0647511	5.81593	5.29834	5.82788	0.765038	0.700287	2	8.6993	0.00785202	0.00809389	123.55	8	0.0765038	1	0.915362	44.5928	2.67615e-05	4.57249	5.64738	0.302341	0.557478	-1.15448	0.596997	0.517593	-0.0119481	-0.529541	7.64785	-0.176543	-8.45131	3.82211e-05	0.863909	1.76034e-05
20411_at	Sorbs1	sorbin and SH3 domain containing 1	Mm.210815; Mm.440351; Mm.489013	ENSMUSG00000025006	NA	19	-40292040; -40292040; -40292040; -40292040	20411	NM_001034962 /// NM_001034963 /// NM_001034964 /// NM_009166 /// NM_178362 /// NP_001030134 /// NP_001030135 /// NP_001030136 /// NP_033192 /// NP_848139 /// XM_006526789 /// XM_006526790 /// XM_006526791 /// XM_006526792 /// XM_006526793 /// XM_006526794 /// XM_006526795 /// XM_006526796 /// XM_006526797 /// XM_006526798 /// XM_006526799 /// XM_006526800 /// XM_006526801 /// XM_006526802 /// XM_…	03320 : PPAR signaling pathway /// 04520 : Adherens junction /// 04910 : Insulin signaling pathway	GO:0001725 - stress fiber /// GO:0016020 - membrane /// GO:0005829 - cytosol /// GO:0005634 - nucleus /// GO:0005856 - cytoskeleton /// GO:0005913 - cell-cell adherens junction /// GO:0005924 - cell-substrate adherens junction /// GO:0016363 - nuclear matrix /// GO:0045121 - membrane raft /// GO:0016600 - flotillin complex /// GO:0005886 - plasma membrane /// GO:0005737 - cytoplasm /// GO:0030054…	GO:0005158 - insulin receptor binding /// GO:0019901 - protein kinase binding /// GO:0005515 - protein binding /// GO:0005070 - SH3/SH2 adaptor activity /// GO:0005158 - insulin receptor binding /// GO:0008134 - transcription factor binding /// GO:0005158 - insulin receptor binding	GO:0008286 - insulin receptor signaling pathway /// GO:0015758 - glucose transport /// GO:0043149 - stress fiber assembly /// GO:0048041 - focal adhesion assembly /// GO:0046326 - positive regulation of glucose import /// GO:0046889 - positive regulation of lipid biosynthetic process /// GO:0032869 - cellular response to insulin stimulus /// GO:0045725 - positive regulation of glycogen biosynthet…	7877	25	7877	9.36593	0.0693727	9.5364	9.0166	9.5874	0.840873	0.771501	2	8.6993	0.00838328	0.00867159	115.319	8	0.0840873	1	0.917499	46.0142	2.36282e-05	4.62657	9.38013	0.31586	0.494728	-1.15093	0.656203	0.519798	-0.0510032	-0.570801	7.43308	-0.729343	-8.81642	4.7527e-05	0.484964	1.26176e-05
21817_at	Tgm2	transglutaminase 2, C polypeptide	Mm.330731	ENSMUSG00000037820	2.3.2.13	2	-158116405	21817	NM_009373 /// NP_033399	05016 : Huntington's disease	GO:0016020 - membrane /// GO:0005829 - cytosol /// GO:0005578 - proteinaceous extracellular matrix /// GO:0005739 - mitochondrion /// GO:0005783 - endoplasmic reticulum /// GO:0005623 - cell /// GO:0005886 - plasma membrane /// GO:0005739 - mitochondrion /// GO:0005829 - cytosol /// GO:0005925 - focal adhesion /// GO:0070062 - extracellular vesicular exosome /// GO:0005737 - cytoplasm	GO:0003810 - protein-glutamine gamma-glutamyltransferase activity /// GO:0005509 - calcium ion binding /// GO:0005525 - GTP binding /// GO:0046872 - metal ion binding /// GO:0016740 - transferase activity /// GO:0016746 - transferase activity, transferring acyl groups /// GO:0003810 - protein-glutamine gamma-glutamyltransferase activity /// GO:0005525 - GTP binding /// GO:0008483 - transaminase a…	GO:0007186 - G-protein coupled receptor signaling pathway /// GO:0018149 - peptide cross-linking /// GO:0032471 - negative regulation of endoplasmic reticulum calcium ion concentration /// GO:0045785 - positive regulation of cell adhesion /// GO:0051561 - positive regulation of mitochondrial calcium ion concentration /// GO:0060445 - branching involved in salivary gland morphogenesis /// GO:00606…	9252	21	9252	8.47364	0.086313	8.76793	8.23975	8.48682	0.565658	0.479345	2	8.6993	0.0103306	0.0107891	92.686	8	0.0565658	1	0.847412	23.2003	0.000325861	3.48697	8.49817	0.264276	1.02078	-0.977837	-0.0429431	0.528187	0.281117	-0.24707	6.80404	3.62131	-3.43774	9.25598e-05	0.0058829	0.00780217
66905_at	Plin3	perilipin 3	Mm.311696	ENSMUSG00000024197	NA	17	-56278962	66905	NM_025836 /// NP_080112	---	GO:0005768 - endosome /// GO:0016020 - membrane /// GO:0005737 - cytoplasm /// GO:0043231 - intracellular membrane-bounded organelle /// GO:0005811 - lipid particle	---	GO:0006810 - transport	19111	22	19111	8.00399	0.0431493	8.18389	7.65283	8.22021	0.820501	0.777352	2	8.6993	0.00536885	0.00539366	185.403	8	0.0820501	1	0.947411	72.3946	3.78236e-06	5.42224	8.01898	0.317612	0.519221	-1.15281	0.63359	0.531058	-0.0363252	-0.567383	9.48948	-0.649095	-10.9509	7.02773e-06	0.533036	2.20645e-06
20167_at	Rtn2	reticulon 2 (Z-band associated protein)	Mm.24142	ENSMUSG00000030401	NA	7	19291069; 19282624	20167	NM_001025364 /// NM_013648 /// NP_001020535 /// NP_038676	---	GO:0014802 - terminal cisterna /// GO:0030315 - T-tubule /// GO:0005622 - intracellular /// GO:0005623 - cell /// GO:0016021 - integral component of membrane /// GO:0016020 - membrane /// GO:0005783 - endoplasmic reticulum	GO:0003674 - molecular_function	GO:0046324 - regulation of glucose import /// GO:0065002 - intracellular protein transmembrane transport	7719	17	7719	5.92339	0.0939793	6.19502	5.66187	5.9812	0.602272	0.508292	2	8.6993	0.0112119	0.0117474	85.1251	8	0.0602272	1	0.843959	22.6676	0.000354742	3.45009	5.94603	0.26831	0.927988	-1.05908	0.131093	0.533151	0.213815	-0.319336	6.59255	2.64388	-4.26505	0.000116978	0.027507	0.00226437
171531_at	Mlph	melanophilin	Mm.105208	ENSMUSG00000026303	NA	1	90915100	171531	NM_053015 /// NP_443748 /// XM_006529231 /// XP_006529294	---	GO:0042470 - melanosome /// GO:0001725 - stress fiber /// GO:0005815 - microtubule organizing center /// GO:0015629 - actin cytoskeleton /// GO:0030864 - cortical actin cytoskeleton /// GO:0035371 - microtubule plus-end /// GO:0042470 - melanosome /// GO:0005622 - intracellular /// GO:0005623 - cell /// GO:0070062 - extracellular vesicular exosome	GO:0003779 - actin binding /// GO:0017022 - myosin binding /// GO:0017137 - Rab GTPase binding /// GO:0005515 - protein binding /// GO:0031489 - myosin V binding /// GO:0051010 - microtubule plus-end binding /// GO:0046872 - metal ion binding	GO:0006605 - protein targeting /// GO:0030318 - melanocyte differentiation /// GO:0032400 - melanosome localization /// GO:0043473 - pigmentation /// GO:0006886 - intracellular protein transport	6355	22	6354	3.71694	0.0765735	4.06987	3.53198	3.63721	0.612516	0.535942	2	8.6993	0.00921103	0.00957169	104.475	8	0.0612516	1	0.874985	29.0924	0.000140252	3.85309	3.74635	0.28507	1.13486	-0.751991	-0.382873	0.537886	0.432662	-0.105225	7.338	5.9025	-1.55052	5.24202e-05	0.000260822	0.156588
29810_at	Bag3	BCL2-associated athanogene 3	Mm.84073	ENSMUSG00000030847	NA	7	128523583	29810	NM_013863 /// NP_038891	---	GO:0030018 - Z disc /// GO:0005886 - plasma membrane /// GO:0005829 - cytosol /// GO:0005737 - cytoplasm /// GO:0043005 - neuron projection	GO:0032403 - protein complex binding /// GO:0005515 - protein binding /// GO:0051087 - chaperone binding /// GO:0032403 - protein complex binding	GO:0097192 - extrinsic apoptotic signaling pathway in absence of ligand /// GO:0010664 - negative regulation of striated muscle cell apoptotic process /// GO:0050821 - protein stabilization /// GO:0071260 - cellular response to mechanical stimulus /// GO:0006915 - apoptotic process /// GO:0008625 - extrinsic apoptotic signaling pathway via death domain receptors	13845	27	13845	8.55156	0.117441	8.81469	8.27393	8.63184	0.659253	0.541812	2	8.6993	0.0139088	0.0146801	68.1195	8	0.0659253	1	0.821858	19.4773	0.000612753	3.21271	8.57348	0.275064	0.876909	-1.08905	0.21214	0.540764	0.182854	-0.35791	6.0035	2.03002	-4.29185	0.000231065	0.0740153	0.00217889
70209_at	Tmem143	transmembrane protein 143	Mm.163766; Mm.431771	ENSMUSG00000002781	NA	7	45897069	70209	NM_144801 /// NP_659050 /// XM_006541188 /// XM_006541189 /// XM_006541190 /// XP_006541251 /// XP_006541252 /// XP_006541253	---	GO:0005739 - mitochondrion /// GO:0016021 - integral component of membrane /// GO:0016020 - membrane /// GO:0005739 - mitochondrion	GO:0003674 - molecular_function	GO:0002244 - hematopoietic progenitor cell differentiation	20935	12	20935	6.77243	0.0771217	7.00216	6.45605	6.9165	0.718852	0.641731	2	8.6993	0.00927405	0.00964022	103.732	8	0.0718852	1	0.892715	34.5982	7.22781e-05	4.14099	6.79157	0.293707	0.716999	-1.14236	0.42536	0.546106	0.0856564	-0.460449	7.42478	1.16457	-6.7618	4.79336e-05	0.275133	9.69506e-05
56690_at	Mlycd	malonyl-CoA decarboxylase	Mm.423037	ENSMUSG00000074064	4.1.1.9	8	119394892	56690	NM_019966 /// NP_064350 /// XM_006531218 /// XM_006531219 /// XM_006531220 /// XM_006531221 /// XM_006531222 /// XM_006531223 /// XM_006531224 /// XM_006531225 /// XM_006531226 /// XP_006531281 /// XP_006531282 /// XP_006531283 /// XP_006531284 /// XP_006531285 /// XP_006531286 /// XP_006531287 /// XP_006531288 /// XP_006531289	00410 : beta-Alanine metabolism /// 00640 : Propanoate metabolism /// 01100 : Metabolic pathways /// 04146 : Peroxisome	GO:0005739 - mitochondrion /// GO:0005759 - mitochondrial matrix /// GO:0005739 - mitochondrion /// GO:0005829 - cytosol /// GO:0005777 - peroxisome /// GO:0005737 - cytoplasm /// GO:0005759 - mitochondrial matrix /// GO:0005782 - peroxisomal matrix	GO:0050080 - malonyl-CoA decarboxylase activity /// GO:0005515 - protein binding /// GO:0016829 - lyase activity /// GO:0016831 - carboxy-lyase activity /// GO:0005102 - receptor binding /// GO:0050080 - malonyl-CoA decarboxylase activity	GO:0046321 - positive regulation of fatty acid oxidation /// GO:2001294 - malonyl-CoA catabolic process /// GO:0006629 - lipid metabolic process /// GO:0006631 - fatty acid metabolic process /// GO:0002931 - response to ischemia /// GO:0006085 - acetyl-CoA biosynthetic process /// GO:0006633 - fatty acid biosynthetic process /// GO:0010906 - regulation of glucose metabolic process /// GO:0019395 …	17120	22	17120	6.24693	0.108296	6.49035	5.94287	6.36841	0.714895	0.606599	2	8.6993	0.0128576	0.013537	73.8714	8	0.0714895	1	0.848514	23.5891	0.000306592	3.51344	6.26721	0.287428	0.776341	-1.12842	0.35208	0.547482	0.121945	-0.425537	6.32166	1.40807	-5.30728	0.000159123	0.193829	0.000547579
216198_at	Tcp11l2	t-complex 11 (mouse) like 2	Mm.296142	ENSMUSG00000020034	NA	10	84576947	216198	NM_146008 /// NP_666120	---	GO:0005575 - cellular_component	GO:0003674 - molecular_function	GO:0008150 - biological_process	8953	29	8953	7.3459	0.105819	7.51669	6.96899	7.59473	1.00922	0.903399	2	8.6993	0.0125729	0.0132274	75.6005	8	0.100922	1	0.895147	35.9264	6.24682e-05	4.20434	7.36014	0.340979	0.459128	-1.14712	0.687987	0.547696	-0.0780362	-0.625732	6.39534	-0.911213	-7.89198	0.000146218	0.386736	3.00036e-05
59027_at	Nampt	nicotinamide phosphoribosyltransferase	Mm.202727	ENSMUSG00000020572	2.4.2.12	12	32820335	59027	NM_021524 /// NP_067499	00760 : Nicotinate and nicotinamide metabolism	GO:0005737 - cytoplasm /// GO:0005576 - extracellular region /// GO:0005615 - extracellular space /// GO:0005634 - nucleus /// GO:0005737 - cytoplasm /// GO:0070062 - extracellular vesicular exosome	GO:0047280 - nicotinamide phosphoribosyltransferase activity /// GO:0004514 - nicotinate-nucleotide diphosphorylase (carboxylating) activity /// GO:0016740 - transferase activity /// GO:0016757 - transferase activity, transferring glycosyl groups /// GO:0005125 - cytokine activity /// GO:0008144 - drug binding /// GO:0042803 - protein homodimerization activity /// GO:0047280 - nicotinamide phosph…	GO:0009435 - NAD biosynthetic process /// GO:0032922 - circadian regulation of gene expression /// GO:0019363 - pyridine nucleotide biosynthetic process /// GO:0045944 - positive regulation of transcription from RNA polymerase II promoter /// GO:0048661 - positive regulation of smooth muscle cell proliferation /// GO:0051770 - positive regulation of nitric-oxide synthase biosynthetic process	17458	21	17458	8.61402	0.074298	8.8927	8.33545	8.68359	0.637049	0.562751	2	8.6993	0.00894945	0.00928725	107.675	8	0.0637049	1	0.883372	31.4405	0.000104406	3.98127	8.63725	0.2815	0.90746	-1.0721	0.164644	0.557247	0.209103	-0.348145	7.71243	2.89403	-5.20447	3.58296e-05	0.0183952	0.000625516
13120_at	Cyp4b1	cytochrome P450, family 4, subfamily b,	Mm.1840	ENSMUSG00000028713	NA	4	-115624728	13120	NM_007823 /// NP_031849	---	GO:0016020 - membrane /// GO:0005783 - endoplasmic reticulum /// GO:0043231 - intracellular membrane-bounded organelle	GO:0046872 - metal ion binding /// GO:0005506 - iron ion binding /// GO:0016491 - oxidoreductase activity /// GO:0016705 - oxidoreductase activity, acting on paired donors, with incorporation or reduction of molecular oxygen /// GO:0020037 - heme binding /// GO:0070330 - aromatase activity /// GO:0004497 - monooxygenase activity /// GO:0008144 - drug binding /// GO:0018585 - fluorene oxygenase ac…	GO:0055114 - oxidation-reduction process /// GO:0006725 - cellular aromatic compound metabolic process /// GO:0018879 - biphenyl metabolic process /// GO:0018917 - fluorene metabolic process /// GO:0042738 - exogenous drug catabolic process	4461	14	4461	6.31666	0.138498	6.52859	5.96875	6.50562	0.900219	0.761721	2	8.6993	0.0163294	0.0173123	57.7625	8	0.0900219	1	0.84615	23.3236	0.000319591	3.4954	6.33432	0.316799	0.613226	-1.15394	0.540715	0.559837	0.0229714	-0.536865	5.73612	0.235366	-5.94149	0.000319361	0.819371	0.000248867
74144_at	Robo4	roundabout homolog 4 (Drosophila)	Mm.485070	ENSMUSG00000032125	NA	9	37402046	74144	NM_028783 /// NP_083059 /// XM_006510644 /// XM_006510645 /// XM_006510646 /// XM_006510647 /// XP_006510707 /// XP_006510708 /// XP_006510709 /// XP_006510710	---	GO:0016021 - integral component of membrane /// GO:0009897 - external side of plasma membrane /// GO:0070062 - extracellular vesicular exosome	GO:0004872 - receptor activity /// GO:0005515 - protein binding	GO:0030336 - negative regulation of cell migration /// GO:0007275 - multicellular organismal development /// GO:0030154 - cell differentiation /// GO:0001525 - angiogenesis	22682	30	22682	6.44901	0.0396777	6.71473	6.15332	6.54541	0.638393	0.598716	2	8.6993	0.00496979	0.00495971	201.625	8	0.0638393	1	0.937848	60.2355	8.00958e-06	5.09639	6.47115	0.287975	0.845814	-1.10368	0.257863	0.561405	0.169315	-0.39209	10.4267	3.14462	-7.86559	3.28922e-06	0.0123452	3.07902e-05
18583_at	Pde7a	phosphodiesterase 7A	Mm.355614	ENSMUSG00000069094	3.1.4.17	3	-19225918; -19225918	18583	NM_001122759 /// NM_008802 /// NP_001116231 /// NP_032828 /// XM_006535405 /// XM_006535406 /// XM_006535407 /// XM_006535408 /// XP_006535468 /// XP_006535469 /// XP_006535470 /// XP_006535471 /// XR_389588	00230 : Purine metabolism	---	GO:0004114 - 3',5'-cyclic-nucleotide phosphodiesterase activity /// GO:0046872 - metal ion binding /// GO:0008081 - phosphoric diester hydrolase activity /// GO:0016787 - hydrolase activity /// GO:0004112 - cyclic-nucleotide phosphodiesterase activity /// GO:0004115 - 3',5'-cyclic-AMP phosphodiesterase activity	GO:0007165 - signal transduction	6984	30	6984	6.09306	0.0694959	6.43626	5.87378	6.05493	0.621	0.551504	2	8.6993	0.00839745	0.00868699	115.115	8	0.0621	1	0.88809	32.8376	8.83871e-05	4.05361	6.12166	0.287114	1.09574	-0.863339	-0.232397	0.562478	0.381325	-0.181152	8.03662	5.44833	-2.79567	2.60661e-05	0.000457309	0.0215399
433766_at	Trim63	tripartite motif-containing 63	Mm.331961	ENSMUSG00000028834	NA	4	134315120	433766	NM_001039048 /// NP_001034137 /// XM_006538998 /// XM_006538999 /// XP_006539061 /// XP_006539062	---	GO:0005622 - intracellular /// GO:0005634 - nucleus /// GO:0005737 - cytoplasm /// GO:0043292 - contractile fiber	GO:0004842 - ubiquitin-protein transferase activity /// GO:0005515 - protein binding /// GO:0046872 - metal ion binding /// GO:0008270 - zinc ion binding /// GO:0008766 - UDP-N-acetylmuramoylalanyl-D-glutamyl-2,6-diaminopimelate-D-alanyl-D-alanine ligase activity /// GO:0016874 - ligase activity /// GO:0018169 - ribosomal S6-glutamic acid ligase activity /// GO:0043773 - coenzyme F420-0 gamma-glu…	GO:0014894 - response to denervation involved in regulation of muscle adaptation /// GO:0043161 - proteasome-mediated ubiquitin-dependent protein catabolic process /// GO:0071549 - cellular response to dexamethasone stimulus /// GO:0010468 - regulation of gene expression /// GO:0016567 - protein ubiquitination /// GO:0014878 - response to electrical stimulus involved in regulation of muscle adapt…	15833	15	15833	8.4566	0.109879	8.66116	8.09131	8.66846	0.948701	0.838822	2	8.6993	0.0130396	0.0137349	72.8072	8	0.0948701	1	0.884179	32.1645	9.56964e-05	4.0191	8.47364	0.331131	0.566301	-1.15463	0.58833	0.569854	-0.00729463	-0.577148	6.53391	-0.0836398	-7.14777	0.00012494	0.935236	6.39595e-05
241296_at	Lrrc8a	leucine rich repeat containing 8A	Mm.389232; Mm.475219	ENSMUSG00000007476; ENSMUSG00000099041	NA	2	30237769	241296	NM_177725 /// NP_808393	---	GO:0005886 - plasma membrane /// GO:0016020 - membrane /// GO:0009986 - cell surface /// GO:0034702 - ion channel complex	GO:0005253 - anion channel activity	GO:0006820 - anion transport /// GO:0006884 - cell volume homeostasis /// GO:0006970 - response to osmotic stress	11645	22	11645	7.19702	0.109268	7.63746	7.06714	6.99658	0.919405	0.810137	2	8.6993	0.0129693	0.0136585	73.2144	8	0.0919405	1	0.881153	31.2328	0.000107083	3.97028	7.23373	0.351418	1.14887	-0.474045	-0.674822	0.57032	0.640877	0.0705566	6.55694	7.36813	0.876182	0.000121744	5.08124e-05	0.404476
140482_at	Zfp358	zinc finger protein 358	Mm.299073	ENSMUSG00000047264	NA	8	3493138	140482	NM_080461 /// NP_536709 /// XM_006508695 /// XP_006508758	---	GO:0005575 - cellular_component	GO:0003674 - molecular_function	GO:0008150 - biological_process	4801	15	4800	5.13019	0.0477751	5.49754	4.9248	5.06006	0.641028	0.593253	2	8.6993	0.00590061	0.00597189	167.451	8	0.0641028	1	0.925471	50.2705	1.66026e-05	4.77982	5.1608	0.299365	1.12485	-0.788327	-0.336525	0.572739	0.437485	-0.135254	9.76225	7.45687	-2.4901	5.59876e-06	4.63826e-05	0.0352672
55987_at	Cpxm2	carboxypeptidase X 2 (M14 family)	Mm.471654	ENSMUSG00000030862	NA	7	-132042810	55987	NM_018867 /// NP_061355 /// XM_006508033 /// XM_006508034 /// XM_006508035 /// XM_006508036 /// XP_006508096 /// XP_006508097 /// XP_006508098 /// XP_006508099	---	GO:0005576 - extracellular region /// GO:0031012 - extracellular matrix	GO:0004181 - metallocarboxypeptidase activity /// GO:0008270 - zinc ion binding	GO:0007155 - cell adhesion	16820	23	16820	6.4535	0.11268	6.85719	6.2605	6.34375	0.798745	0.686064	2	8.6993	0.0133616	0.0140851	70.9972	8	0.0798745	1	0.858928	25.673	0.000224216	3.64933	6.48714	0.323157	1.14508	-0.701351	-0.44373	0.596687	0.513435	-0.083252	6.75864	5.81565	-1.01855	9.72878e-05	0.000289766	0.335907
18412_at	Sqstm1	sequestosome 1	Mm.40828	ENSMUSG00000015837	NA	11	-50200152	18412	NM_001290769 /// NM_011018 /// NP_001277698 /// NP_035148 /// XM_006532450 /// XP_006532513	04380 : Osteoclast differentiation	GO:0000407 - pre-autophagosomal structure /// GO:0016235 - aggresome /// GO:0005764 - lysosome /// GO:0005783 - endoplasmic reticulum /// GO:0005634 - nucleus /// GO:0005768 - endosome /// GO:0031410 - cytoplasmic vesicle /// GO:0000932 - cytoplasmic mRNA processing body /// GO:0005737 - cytoplasm /// GO:0005776 - autophagic vacuole /// GO:0016234 - inclusion body /// GO:0016605 - PML body /// GO…	GO:0003712 - transcription cofactor activity /// GO:0042802 - identical protein binding /// GO:0070530 - K63-linked polyubiquitin binding /// GO:0005515 - protein binding /// GO:0046872 - metal ion binding /// GO:0008270 - zinc ion binding /// GO:0005080 - protein kinase C binding /// GO:0042802 - identical protein binding /// GO:0019901 - protein kinase binding /// GO:0042169 - SH2 domain bindin…	GO:2001141 - regulation of RNA biosynthetic process /// GO:0002376 - immune system process /// GO:0006915 - apoptotic process /// GO:0030154 - cell differentiation /// GO:0001934 - positive regulation of protein phosphorylation /// GO:0006914 - autophagy /// GO:0016239 - positive regulation of macroautophagy /// GO:0043122 - regulation of I-kappaB kinase/NF-kappaB signaling /// GO:0051291 - prote…	6896	25	6896	9.79248	0.143356	10.0581	9.45508	9.93066	0.88679	0.743434	2	8.6993	0.0168878	0.0179195	55.8052	8	0.088679	1	0.838343	22.011	0.000394814	3.40361	9.81462	0.317828	0.766137	-1.13125	0.365114	0.603042	0.127456	-0.475586	6.07579	1.28415	-5.17556	0.000212048	0.232232	0.000649535
15368_at	Hmox1	heme oxygenase (decycling) 1	Mm.276389	ENSMUSG00000005413	1.14.99.3	8	75093618	15368	NM_010442 /// NP_034572	00860 : Porphyrin and chlorophyll metabolism	GO:0005634 - nucleus /// GO:0016020 - membrane /// GO:0043231 - intracellular membrane-bounded organelle /// GO:0005829 - cytosol /// GO:0005783 - endoplasmic reticulum /// GO:0005634 - nucleus /// GO:0005730 - nucleolus /// GO:0005901 - caveola /// GO:0048471 - perinuclear region of cytoplasm	GO:0046872 - metal ion binding /// GO:0004392 - heme oxygenase (decyclizing) activity /// GO:0004630 - phospholipase D activity /// GO:0004871 - signal transducer activity /// GO:0016491 - oxidoreductase activity /// GO:0019899 - enzyme binding /// GO:0020037 - heme binding /// GO:0042803 - protein homodimerization activity	GO:0034395 - regulation of transcription from RNA polymerase II promoter in response to iron /// GO:0042168 - heme metabolic process /// GO:0071243 - cellular response to arsenic-containing substance /// GO:0071276 - cellular response to cadmium ion /// GO:0006915 - apoptotic process /// GO:0055114 - oxidation-reduction process /// GO:0001525 - angiogenesis /// GO:0002246 - wound healing involved…	5482	19	5482	6.08239	0.074193	6.47852	5.87012	5.99756	0.753964	0.679771	2	8.6993	0.00893739	0.00927413	107.827	8	0.0753964	1	0.901596	38.0296	5.00615e-05	4.3005	6.1154	0.320861	1.1317	-0.764444	-0.367258	0.608398	0.480957	-0.127441	8.42606	6.66105	-1.90643	1.80212e-05	0.000108373	0.0900954
114332_at	Lyve1	lymphatic vessel endothelial hyaluronan	Mm.396078	ENSMUSG00000030787	NA	7	-110850607	114332	NM_053247 /// NP_444477	---	GO:0005886 - plasma membrane /// GO:0071944 - cell periphery /// GO:0016021 - integral component of membrane /// GO:0016020 - membrane /// GO:0070062 - extracellular vesicular exosome	GO:0004888 - transmembrane signaling receptor activity /// GO:0005540 - hyaluronic acid binding	GO:0007165 - signal transduction /// GO:0006027 - glycosaminoglycan catabolic process /// GO:0007155 - cell adhesion /// GO:0006810 - transport	3362	26	3361	7.86937	0.357036	8.4813	7.85986	7.41992	2.28878	1.93174	2	8.6993	0.0414507	0.0446295	22.4067	8	0.228878	1	0.844006	23.3017	0.000320695	3.49391	7.92036	0.533268	1.05189	-0.113447	-0.938439	0.621434	1.06138	0.439941	3.99642	6.82566	3.05593	0.00334917	9.03967e-05	0.0142081
213402_at	Armc2	armadillo repeat containing 2	Mm.211320	ENSMUSG00000071324	NA	10	-41914990	213402	NM_001034858 /// NP_001030030 /// XM_006512653 /// XM_006512654 /// XP_006512716 /// XP_006512717 /// XR_380061 /// XR_380062	---	GO:0005575 - cellular_component	GO:0003674 - molecular_function	GO:0008150 - biological_process	8653	34	8652	4.62137	0.180933	4.86429	4.23438	4.82617	1.1248	0.943862	2	8.6993	0.0212074	0.0226166	44.2152	8	0.11248	1	0.839141	22.2532	0.000379416	3.42088	4.64161	0.353192	0.630468	-1.15302	0.52255	0.629912	0.0381155	-0.591797	5.66342	0.342689	-5.74704	0.00034931	0.739967	0.000315107
140917_at	Dclre1b	DNA cross-link repair 1B, PSO2 homolog (	Mm.374850	ENSMUSG00000027845	NA	3	-103800605	140917	NM_001025312 /// NM_133865 /// NP_001020483 /// NP_598626	---	GO:0000781 - chromosome, telomeric region /// GO:0005737 - cytoplasm /// GO:0005694 - chromosome /// GO:0005856 - cytoskeleton /// GO:0000781 - chromosome, telomeric region /// GO:0005813 - centrosome /// GO:0005634 - nucleus	GO:0008409 - 5'-3' exonuclease activity /// GO:0005515 - protein binding /// GO:0004518 - nuclease activity /// GO:0004527 - exonuclease activity /// GO:0016787 - hydrolase activity /// GO:0042578 - phosphoric ester hydrolase activity /// GO:0043765 - T/G mismatch-specific endonuclease activity /// GO:0044824 - retroviral 3' processing activity /// GO:0008409 - 5'-3' exonuclease activity	GO:0031627 - telomeric loop formation /// GO:0031848 - protection from non-homologous end joining at telomere /// GO:0031860 - telomeric 3' overhang formation /// GO:0090305 - nucleic acid phosphodiester bond hydrolysis /// GO:0006281 - DNA repair /// GO:0006974 - cellular response to DNA damage stimulus /// GO:0000075 - cell cycle checkpoint /// GO:0000723 - telomere maintenance /// GO:0031848 -…	4875	19	4875	5.10845	0.126726	5.43865	4.78784	5.1814	0.886273	0.759548	2	8.6993	0.0149761	0.0158407	63.1285	8	0.0886273	1	0.857013	25.3586	0.00023472	3.62945	5.13596	0.327776	0.923465	-1.06207	0.138608	0.650812	0.257258	-0.393555	6.96302	2.75239	-4.548	7.78867e-05	0.0230927	0.00151632
208449_at	Sgms1	sphingomyelin synthase 1	Mm.329810	ENSMUSG00000040451	2.7.8.27	19	-32122727; -32122727; -32122727	208449	NM_001168525 /// NM_001168526 /// NM_144792 /// NP_001161997 /// NP_001161998 /// NP_659041 /// XM_006526817 /// XM_006526818 /// XM_006526819 /// XM_006526820 /// XM_006526821 /// XM_006526822 /// XP_006526880 /// XP_006526881 /// XP_006526882 /// XP_006526883 /// XP_006526884 /// XP_006526885 /// XR_386452	00600 : Sphingolipid metabolism /// 01100 : Metabolic pathways	GO:0030173 - integral component of Golgi membrane /// GO:0005886 - plasma membrane /// GO:0005783 - endoplasmic reticulum /// GO:0005634 - nucleus /// GO:0016021 - integral component of membrane /// GO:0005794 - Golgi apparatus /// GO:0016020 - membrane /// GO:0030173 - integral component of Golgi membrane /// GO:0000138 - Golgi trans cisterna	GO:0047493 - ceramide cholinephosphotransferase activity /// GO:0033188 - sphingomyelin synthase activity /// GO:0016301 - kinase activity /// GO:0016740 - transferase activity /// GO:0033188 - sphingomyelin synthase activity /// GO:0047493 - ceramide cholinephosphotransferase activity	GO:0006686 - sphingomyelin biosynthetic process /// GO:0016049 - cell growth /// GO:2001237 - negative regulation of extrinsic apoptotic signaling pathway /// GO:0006915 - apoptotic process /// GO:0006629 - lipid metabolic process /// GO:0006665 - sphingolipid metabolic process /// GO:0016310 - phosphorylation /// GO:0016049 - cell growth /// GO:0006686 - sphingomyelin biosynthetic process /// GO…	8229	28	8228	7.07182	0.16182	7.45345	6.80176	7.05566	0.891524	0.729704	2	8.6993	0.0190103	0.0202275	49.4376	8	0.0891524	1	0.81849	19.1924	0.000645675	3.18999	7.10362	0.328483	1.06498	-0.918971	-0.146005	0.651693	0.397786	-0.253906	6.18857	3.77744	-2.60432	0.000185705	0.00464261	0.0293216
60425_at	Doc2g	double C2, gamma	Mm.266972	ENSMUSG00000024871	NA	19	4003385	60425	NM_021791 /// NP_068563 /// XM_006531816 /// XM_006531817 /// XM_006531818 /// XP_006531879 /// XP_006531880 /// XP_006531881 /// XR_388268	---	GO:0016020 - membrane /// GO:0008021 - synaptic vesicle	GO:0005215 - transporter activity	GO:0006810 - transport	17517	17	17517	9.83561	0.0836116	10.269	9.61523	9.73096	0.885159	0.801548	2	8.6993	0.0100201	0.0104515	95.6805	8	0.0885159	1	0.905541	39.9971	4.10942e-05	4.38622	9.87173	0.348876	1.13871	-0.735205	-0.403504	0.653764	0.538042	-0.115723	8.5512	7.03756	-1.63493	1.60521e-05	7.19032e-05	0.137661
74155_at	Errfi1	ERBB receptor feedback inhibitor 1	Mm.318841	ENSMUSG00000028967	NA	4	150855091	74155	NM_133753 /// NP_598514 /// XM_006537088 /// XM_006539210 /// XP_006537151 /// XP_006539273	---	GO:0005737 - cytoplasm /// GO:0031234 - extrinsic component of cytoplasmic side of plasma membrane /// GO:0005886 - plasma membrane /// GO:0016020 - membrane /// GO:0005634 - nucleus /// GO:0005829 - cytosol /// GO:0005737 - cytoplasm	GO:0005515 - protein binding /// GO:0019900 - kinase binding /// GO:0019901 - protein kinase binding	GO:0007175 - negative regulation of epidermal growth factor-activated receptor activity /// GO:0042059 - negative regulation of epidermal growth factor receptor signaling pathway /// GO:0043589 - skin morphogenesis /// GO:0045616 - regulation of keratinocyte differentiation /// GO:0048286 - lung alveolus development /// GO:0060426 - lung vasculature development /// GO:0060428 - lung epithelium de…	22691	21	22691	6.70551	0.207522	7.3766	6.72021	6.1875	2.6328	2.42528	2	8.6993	0.0242637	0.0259402	38.5502	8	0.26328	1	0.921178	49.9774	1.69957e-05	4.76966	6.76144	0.59562	1.03281	-0.0692099	-0.963597	0.656383	1.1891	0.532715	5.51722	9.99494	4.8365	0.000419216	4.63137e-06	0.00101965
110880_at	Scn4a	sodium channel, voltage-gated, type IV,	Mm.432528	ENSMUSG00000001027	NA	11	-106318593	110880	NM_133199 /// NP_573462 /// XM_006531987 /// XM_006531988 /// XP_006532050 /// XP_006532051	---	GO:0001518 - voltage-gated sodium channel complex /// GO:0005886 - plasma membrane /// GO:0016021 - integral component of membrane /// GO:0016020 - membrane	GO:0005248 - voltage-gated sodium channel activity /// GO:0005216 - ion channel activity /// GO:0005244 - voltage-gated ion channel activity /// GO:0005267 - potassium channel activity /// GO:0005272 - sodium channel activity	GO:0006814 - sodium ion transport /// GO:0034765 - regulation of ion transmembrane transport /// GO:0035725 - sodium ion transmembrane transport /// GO:0019228 - neuronal action potential /// GO:0086010 - membrane depolarization during action potential /// GO:0006810 - transport /// GO:0006811 - ion transport /// GO:0055085 - transmembrane transport /// GO:0071805 - potassium ion transmembrane tr…	3265	21	3265	5.14284	0.218105	5.32256	4.66455	5.48633	1.70198	1.48388	2	8.6993	0.0254803	0.0272631	36.6796	8	0.170198	1	0.871852	29.1181	0.000139785	3.85454	5.15781	0.434955	0.37877	-1.13405	0.755284	0.658011	-0.163767	-0.821777	5.39724	-1.34327	-7.28059	0.000487986	0.213172	5.56415e-05
113858_at	Vmn1r10	vomeronasal 1 receptor 10	Mm.436285	ENSMUSG00000093785	NA	6	57113425	113858	NM_053231 /// NP_444461	---	GO:0005575 - cellular_component	GO:0004872 - receptor activity	GO:0007606 - sensory perception of chemical stimulus	3329	16	3329	2.55266	0.0698042	3.0694	2.40125	2.31653	1.18559	1.11578	2	8.6993	0.00843289	0.00872553	114.606	8	0.118559	1	0.941123	66.1567	5.46899e-06	5.26209	2.59572	0.412393	1.14859	-0.471583	-0.67701	0.66815	0.752867	0.0847168	9.52637	10.7342	1.30466	6.81281e-06	2.597e-06	0.225465
231510_at	Agpat9	1-acylglycerol-3-phosphate O-acyltransfe	Mm.271911	ENSMUSG00000029314	2.3.1.15	5	100846229	231510	NM_172715 /// NP_766303	00561 : Glycerolipid metabolism /// 00564 : Glycerophospholipid metabolism /// 01100 : Metabolic pathways	GO:0005783 - endoplasmic reticulum /// GO:0016021 - integral component of membrane /// GO:0016020 - membrane /// GO:0005783 - endoplasmic reticulum /// GO:0005789 - endoplasmic reticulum membrane	GO:0004366 - glycerol-3-phosphate O-acyltransferase activity /// GO:0003841 - 1-acylglycerol-3-phosphate O-acyltransferase activity /// GO:0016740 - transferase activity /// GO:0016746 - transferase activity, transferring acyl groups /// GO:0004366 - glycerol-3-phosphate O-acyltransferase activity	GO:0019432 - triglyceride biosynthetic process /// GO:0008152 - metabolic process /// GO:0006629 - lipid metabolic process /// GO:0008654 - phospholipid biosynthetic process /// GO:0019432 - triglyceride biosynthetic process /// GO:0032006 - regulation of TOR signaling	10608	26	10608	6.14756	0.124325	6.61461	5.94604	5.99878	1.02972	0.905391	2	8.6993	0.0147001	0.0155406	64.3476	8	0.102972	1	0.879263	30.7954	0.000113002	3.94691	6.18648	0.371711	1.15179	-0.646831	-0.504961	0.668568	0.615834	-0.0527344	7.21983	6.65035	-0.615104	5.92894e-05	0.00010967	0.554233
13660_at	Ehd1	EH-domain containing 1	Mm.30169	ENSMUSG00000024772	NA	19	6276896	13660	NM_010119 /// NP_034249	04144 : Endocytosis	GO:0005886 - plasma membrane /// GO:0005768 - endosome /// GO:0005769 - early endosome /// GO:0030139 - endocytic vesicle /// GO:0005811 - lipid particle /// GO:0031095 - platelet dense tubular network membrane /// GO:0048471 - perinuclear region of cytoplasm /// GO:0016020 - membrane /// GO:0010008 - endosome membrane /// GO:0031901 - early endosome membrane /// GO:0055038 - recycling endosome m…	GO:0005515 - protein binding /// GO:0000166 - nucleotide binding /// GO:0003924 - GTPase activity /// GO:0005509 - calcium ion binding /// GO:0046872 - metal ion binding /// GO:0005524 - ATP binding /// GO:0005525 - GTP binding /// GO:0017137 - Rab GTPase binding	GO:0006897 - endocytosis /// GO:0016197 - endosomal transport /// GO:0010886 - positive regulation of cholesterol storage /// GO:0034383 - low-density lipoprotein particle clearance /// GO:0042632 - cholesterol homeostasis /// GO:1901741 - positive regulation of myoblast fusion /// GO:2001137 - positive regulation of endocytic recycling /// GO:0006886 - intracellular protein transport /// GO:0006…	4670	11	4670	7.11022	0.0724548	7.44777	6.77686	7.19043	0.884534	0.812079	2	8.6993	0.00873758	0.00905686	110.414	8	0.0884534	1	0.918087	46.4705	2.27192e-05	4.64361	7.13835	0.338475	0.914152	-1.06801	0.153862	0.670913	0.257339	-0.413574	9.3975	3.60455	-6.2571	7.59706e-06	0.00603544	0.000171458
57436_at	Gabarapl1	gamma-aminobutyric acid (GABA) A recepto	Mm.14638	ENSMUSG00000030161	NA	6	129533192	57436	NM_020590 /// NP_065615	04140 : Regulation of autophagy	GO:0019898 - extrinsic component of membrane /// GO:0000407 - pre-autophagosomal structure /// GO:0000421 - autophagic vacuole membrane /// GO:0005829 - cytosol /// GO:0016020 - membrane /// GO:0005737 - cytoplasm /// GO:0005856 - cytoskeleton /// GO:0005874 - microtubule /// GO:0031410 - cytoplasmic vesicle /// GO:0005622 - intracellular /// GO:0005783 - endoplasmic reticulum /// GO:0005794 - Go…	GO:0005515 - protein binding /// GO:0008017 - microtubule binding /// GO:0050811 - GABA receptor binding /// GO:0008092 - cytoskeletal protein binding	GO:0000045 - autophagic vacuole assembly /// GO:0000422 - mitochondrion degradation /// GO:0061025 - membrane fusion /// GO:0044804 - nucleophagy /// GO:0006914 - autophagy	17280	23	17280	7.78601	0.149599	8.10177	7.42725	7.90796	1.02304	0.873445	2	8.6993	0.0176055	0.0186999	53.4762	8	0.102304	1	0.85377	24.8061	0.000254693	3.59398	7.81232	0.347282	0.833457	-1.10884	0.275379	0.674524	0.193811	-0.480713	6.65602	1.91247	-5.12362	0.00010898	0.0892369	0.000695249
71093_at	Atoh8	atonal homolog 8 (Drosophila)	Mm.87449	ENSMUSG00000037621	NA	6	-72206177	71093	NM_153778 /// NP_722473 /// XR_377494	---	GO:0005634 - nucleus	GO:0003677 - DNA binding /// GO:0046983 - protein dimerization activity	GO:0006351 - transcription, DNA-templated /// GO:0006355 - regulation of transcription, DNA-templated /// GO:0007275 - multicellular organismal development /// GO:0007399 - nervous system development /// GO:0030154 - cell differentiation	21269	20	21269	5.62197	0.311924	6.17377	5.4978	5.33228	1.62273	1.31081	2	8.6993	0.036265	0.0389905	25.6472	8	0.162273	1	0.807778	18.0726	0.000798123	3.09793	5.66795	0.445803	1.13463	-0.381663	-0.752964	0.675966	0.841494	0.165527	4.64753	5.7856	1.22925	0.00132049	0.000300581	0.251188
20289_at	Scx	scleraxis	Mm.322821	ENSMUSG00000034161	NA	15	76457438	20289	NM_198885 /// NP_942588 /// XM_006520660 /// XP_006520723	---	GO:0005634 - nucleus /// GO:0005667 - transcription factor complex /// GO:0005634 - nucleus /// GO:0005667 - transcription factor complex	GO:0003677 - DNA binding /// GO:0043565 - sequence-specific DNA binding /// GO:0070888 - E-box binding /// GO:0005515 - protein binding /// GO:0043425 - bHLH transcription factor binding /// GO:0046982 - protein heterodimerization activity /// GO:0046983 - protein dimerization activity /// GO:0043425 - bHLH transcription factor binding /// GO:0046982 - protein heterodimerization activity /// GO:0…	GO:0006351 - transcription, DNA-templated /// GO:0010628 - positive regulation of gene expression /// GO:0045893 - positive regulation of transcription, DNA-templated /// GO:0032967 - positive regulation of collagen biosynthetic process /// GO:0045944 - positive regulation of transcription from RNA polymerase II promoter /// GO:0001707 - mesoderm formation /// GO:0001894 - tissue homeostasis /// …	7788	22	7788	6.11907	0.153475	6.55084	5.87354	6.04077	0.978424	0.824949	2	8.6993	0.018051	0.0191843	52.1258	8	0.0978424	1	0.843141	22.8506	0.000344481	3.46283	6.15505	0.352817	1.1218	-0.797902	-0.3239	0.677305	0.510069	-0.167236	6.60048	4.97073	-1.76034	0.000115943	0.000851246	0.113362
103988_at	Gck	glucokinase	Mm.220358	ENSMUSG00000041798	2.7.1.2	11	-5900823	103988	NM_001287386 /// NM_010292 /// NP_001274315 /// NP_034422 /// XM_006514443 /// XM_006514444 /// XM_006514445 /// XP_006514506 /// XP_006514507 /// XP_006514508 /// XR_380955	00010 : Glycolysis / Gluconeogenesis /// 00052 : Galactose metabolism /// 00500 : Starch and sucrose metabolism /// 00520 : Amino sugar and nucleotide sugar metabolism /// 00524 : Butirosin and neomycin biosynthesis /// 01100 : Metabolic pathways /// 04910 : Insulin signaling pathway /// 04930 : Type II diabetes mellitus /// 04950 : Maturity onset diabetes of the young	GO:0005739 - mitochondrion /// GO:0005829 - cytosol /// GO:0005634 - nucleus /// GO:0005623 - cell /// GO:0005829 - cytosol /// GO:0005739 - mitochondrion /// GO:0005829 - cytosol /// GO:0005634 - nucleus /// GO:0005737 - cytoplasm /// GO:0005654 - nucleoplasm /// GO:0030141 - secretory granule /// GO:0005884 - actin filament /// GO:0005938 - cell cortex /// GO:0045180 - basal cortex	GO:0004340 - glucokinase activity /// GO:0004340 - glucokinase activity /// GO:0005515 - protein binding /// GO:0000166 - nucleotide binding /// GO:0004396 - hexokinase activity /// GO:0016301 - kinase activity /// GO:0016740 - transferase activity /// GO:0016773 - phosphotransferase activity, alcohol group as acceptor /// GO:0000287 - magnesium ion binding /// GO:0004340 - glucokinase activity /…	GO:0006006 - glucose metabolic process /// GO:0046835 - carbohydrate phosphorylation /// GO:0001678 - cellular glucose homeostasis /// GO:0006006 - glucose metabolic process /// GO:0006739 - NADP metabolic process /// GO:0050796 - regulation of insulin secretion /// GO:0032024 - positive regulation of insulin secretion /// GO:0042593 - glucose homeostasis /// GO:0043266 - regulation of potassium …	2616	27	2616	5.78234	0.0912346	6.12541	5.44409	5.86328	0.928188	0.836953	2	8.6993	0.0108963	0.0114043	87.6861	8	0.0928188	1	0.901707	38.4052	4.81766e-05	4.31716	5.81093	0.343665	0.915092	-1.06743	0.152335	0.681323	0.262133	-0.419189	8.54582	3.28793	-5.67917	1.61317e-05	0.0098529	0.000342569
338417_at	Scgb1c1	secretoglobin, family 1C, member 1	Mm.270960	ENSMUSG00000038801	NA	7	140845565	338417	NM_001099742 /// NP_001093212	---	GO:0005575 - cellular_component /// GO:0005576 - extracellular region	GO:0003674 - molecular_function	GO:0008150 - biological_process	14880	24	14880	8.5916	0.112348	9.23301	8.54053	8.16162	2.09654	1.9842	2	8.6993	0.0133234	0.0140435	71.2074	8	0.209654	1	0.946413	74.4631	3.36917e-06	5.47248	8.64505	0.543291	1.08222	-0.192396	-0.889824	0.692486	1.07139	0.378906	7.855	12.153	4.64237	3.11125e-05	9.37859e-07	0.00132995
93677_at	Lmod2	leiomodin 2 (cardiac)	Mm.332941	ENSMUSG00000029683	NA	6	24597771	93677	NM_053098 /// NP_444328	---	GO:0005575 - cellular_component	GO:0003674 - molecular_function /// GO:0003779 - actin binding /// GO:0005523 - tropomyosin binding	GO:0008150 - biological_process /// GO:0051694 - pointed-end actin filament capping	24662	21	24662	11.0504	0.133048	11.3689	10.6689	11.1929	1.10061	0.967557	2	8.6993	0.0157029	0.016631	60.1285	8	0.110061	1	0.879113	30.8082	0.000112823	3.9476	11.0769	0.364103	0.801962	-1.12045	0.318493	0.699959	0.176033	-0.523926	7.31347	1.83927	-5.91282	5.37707e-05	0.100171	0.000257598
20708_at	Serpinb6b	serine (or cysteine) peptidase inhibitor	Mm.36526	ENSMUSG00000042842	NA	13	32965513	20708	NM_011454 /// NP_035584 /// XM_006516621 /// XM_006516622 /// XP_006516684 /// XP_006516685	05146 : Amoebiasis	GO:0005622 - intracellular	GO:0004867 - serine-type endopeptidase inhibitor activity /// GO:0004867 - serine-type endopeptidase inhibitor activity	GO:0008406 - gonad development /// GO:0010951 - negative regulation of endopeptidase activity /// GO:0010951 - negative regulation of endopeptidase activity /// GO:0030162 - regulation of proteolysis	8068	10	8068	8.12205	0.096968	8.57741	7.8772	8.02539	0.996223	0.899255	2	8.6993	0.0115554	0.012121	82.5015	8	0.0996223	1	0.902664	38.9106	4.57762e-05	4.33936	8.16	0.369007	1.13118	-0.766391	-0.364791	0.700218	0.552024	-0.148193	8.52868	6.72368	-1.94962	1.63882e-05	0.000101109	0.0841298
217835_at	Rin3	Ras and Rab interactor 3	Mm.24145	ENSMUSG00000044456	NA	12	102283074; 102283641	217835	NM_001161365 /// NM_177620 /// NP_001154837 /// NP_808288 /// XM_006515741 /// XP_006515804	---	GO:0005737 - cytoplasm /// GO:0005768 - endosome /// GO:0005769 - early endosome /// GO:0031410 - cytoplasmic vesicle	GO:0005096 - GTPase activator activity /// GO:0017112 - Rab guanyl-nucleotide exchange factor activity /// GO:0017137 - Rab GTPase binding	GO:0007165 - signal transduction /// GO:0032851 - positive regulation of Rab GTPase activity	9207	20	9207	6.58407	0.092379	7.10091	6.39014	6.39038	1.19426	1.10188	2	8.6993	0.0110279	0.0115474	86.5998	8	0.119426	1	0.922647	49.9586	1.70213e-05	4.76901	6.62714	0.410296	1.1547	-0.577648	-0.577053	0.710775	0.710531	-0.000244141	8.86191	8.85886	-0.00328782	1.21145e-05	1.21474e-05	0.997451
11826_at	Aqp1	aquaporin 1	Mm.18625	ENSMUSG00000004655	NA	6	55336299	11826	NM_007472 /// NP_031498	04964 : Proximal tubule bicarbonate reclamation /// 04976 : Bile secretion	GO:0005887 - integral component of plasma membrane /// GO:0005886 - plasma membrane /// GO:0016021 - integral component of membrane /// GO:0016020 - membrane /// GO:0005903 - brush border /// GO:0016323 - basolateral plasma membrane /// GO:0016324 - apical plasma membrane /// GO:0020003 - symbiont-containing vacuole /// GO:0030424 - axon /// GO:0070062 - extracellular vesicular exosome /// GO:000…	GO:0015250 - water channel activity /// GO:0005372 - water transmembrane transporter activity /// GO:0015079 - potassium ion transmembrane transporter activity /// GO:0046875 - ephrin receptor binding /// GO:0005215 - transporter activity /// GO:0005223 - intracellular cGMP activated cation channel activity /// GO:0005267 - potassium channel activity /// GO:0022857 - transmembrane transporter act…	GO:0006833 - water transport /// GO:0055085 - transmembrane transport /// GO:0006813 - potassium ion transport /// GO:0006833 - water transport /// GO:0071805 - potassium ion transmembrane transport /// GO:0003094 - glomerular filtration /// GO:0006833 - water transport /// GO:0019233 - sensory perception of pain /// GO:0030104 - water homeostasis /// GO:0030335 - positive regulation of cell migr…	3683	24	3683	8.92323	0.243281	9.57268	8.83203	8.52734	2.16881	1.92553	2	8.6993	0.0283743	0.0304101	32.8838	8	0.216881	1	0.887827	33.9308	7.79214e-05	4.10834	8.97735	0.537606	1.10737	-0.27031	-0.837059	0.740649	1.04534	0.304688	5.75693	8.12521	2.55804	0.000311311	2.39374e-05	0.0315985
319713_at	Ablim3	actin binding LIM protein family, member	Mm.329478	ENSMUSG00000032735	NA	18	-61799393; -61799393	319713	NM_001164491 /// NM_198649 /// NP_001157963 /// NP_941051 /// XM_006526005 /// XM_006526006 /// XM_006526007 /// XM_006526008 /// XM_006526009 /// XM_006526010 /// XM_006526011 /// XM_006526012 /// XP_006526068 /// XP_006526069 /// XP_006526070 /// XP_006526071 /// XP_006526072 /// XP_006526073 /// XP_006526074 /// XP_006526075	04360 : Axon guidance	GO:0005737 - cytoplasm /// GO:0001725 - stress fiber /// GO:0030027 - lamellipodium	GO:0003674 - molecular_function /// GO:0003779 - actin binding /// GO:0046872 - metal ion binding /// GO:0008270 - zinc ion binding	GO:0045944 - positive regulation of transcription from RNA polymerase II promoter /// GO:0030036 - actin cytoskeleton organization /// GO:0007010 - cytoskeleton organization /// GO:0006351 - transcription, DNA-templated /// GO:0042384 - cilium assembly /// GO:0030032 - lamellipodium assembly	14092	21	14092	7.43862	0.18435	7.89995	7.15576	7.37549	1.15879	0.974445	2	8.6993	0.0216001	0.0230437	43.3958	8	0.115879	1	0.840913	22.5565	0.000361159	3.4423	7.47707	0.38235	1.10601	-0.84034	-0.265666	0.744185	0.524458	-0.219727	6.62972	4.67224	-2.11432	0.00011222	0.00127623	0.0646702
67731_at	Fbxo32	F-box protein 32	Mm.25683	ENSMUSG00000022358	NA	15	-58175879	67731	NM_026346 /// NP_080622	---	GO:0005634 - nucleus /// GO:0005634 - nucleus /// GO:0030018 - Z disc /// GO:0005737 - cytoplasm /// GO:0005730 - nucleolus	GO:0005515 - protein binding	GO:0014894 - response to denervation involved in regulation of muscle adaptation /// GO:0071549 - cellular response to dexamethasone stimulus /// GO:0014878 - response to electrical stimulus involved in regulation of muscle adaptation /// GO:0014889 - muscle atrophy	19715	29	19715	7.93679	0.247549	8.21484	7.4668	8.19824	1.63649	1.38894	2	8.6993	0.028865	0.0309436	32.3168	8	0.163649	1	0.848732	24.0593	0.00028512	3.54497	7.95996	0.427173	0.596673	-1.15448	0.557809	0.748047	0.0166016	-0.731445	5.76481	0.12794	-6.08851	0.000308322	0.901105	0.000208881
22695_at	Zfp36	zinc finger protein 36	Mm.389856	ENSMUSG00000044786	NA	7	-28376784	22695	NM_011756 /// NP_035886	---	GO:0005829 - cytosol /// GO:0005634 - nucleus /// GO:0005737 - cytoplasm /// GO:0005829 - cytosol /// GO:0005634 - nucleus /// GO:0005737 - cytoplasm /// GO:0010494 - cytoplasmic stress granule	GO:0003729 - mRNA binding /// GO:0017091 - AU-rich element binding /// GO:0035925 - mRNA 3'-UTR AU-rich region binding /// GO:0005515 - protein binding /// GO:0003677 - DNA binding /// GO:0046872 - metal ion binding /// GO:0003729 - mRNA binding /// GO:0017091 - AU-rich element binding /// GO:0019901 - protein kinase binding /// GO:0019957 - C-C chemokine binding /// GO:0044822 - poly(A) RNA bind…	GO:0000288 - nuclear-transcribed mRNA catabolic process, deadenylation-dependent decay /// GO:0000289 - nuclear-transcribed mRNA poly(A) tail shortening /// GO:0035556 - intracellular signal transduction /// GO:0035278 - negative regulation of translation involved in gene silencing by miRNA /// GO:0043488 - regulation of mRNA stability /// GO:0060213 - positive regulation of nuclear-transcribed m…	10099	18	10100	6.53271	0.184154	7.07176	6.31982	6.34131	1.38371	1.19955	2	8.6993	0.0215776	0.0230193	43.4418	8	0.138371	1	0.866912	27.7962	0.000166566	3.77841	6.57763	0.428065	1.15434	-0.602263	-0.552074	0.751938	0.730454	-0.0214844	6.70227	6.51077	-0.206841	0.00010353	0.000128244	0.840894
16890_at	Lipe	lipase, hormone sensitive	Mm.158548; Mm.333679	ENSMUSG00000003123	3.1.1.79	7	-25379527; -25379527	16890	NM_001039507 /// NM_010719 /// NP_001034596 /// NP_034849 /// XM_006539570 /// XM_006539571 /// XM_006539572 /// XP_006539633 /// XP_006539634 /// XP_006539635	04910 : Insulin signaling pathway	GO:0005739 - mitochondrion /// GO:0005634 - nucleus /// GO:0005737 - cytoplasm /// GO:0005901 - caveola /// GO:0005829 - cytosol /// GO:0005811 - lipid particle /// GO:0005886 - plasma membrane /// GO:0016020 - membrane /// GO:0005615 - extracellular space /// GO:0005737 - cytoplasm	GO:0042134 - rRNA primary transcript binding /// GO:0004806 - triglyceride lipase activity /// GO:0005515 - protein binding /// GO:0019901 - protein kinase binding /// GO:0016298 - lipase activity /// GO:0016787 - hydrolase activity /// GO:0033878 - hormone-sensitive lipase activity /// GO:0016788 - hydrolase activity, acting on ester bonds /// GO:0047372 - acylglycerol lipase activity	GO:0006363 - termination of RNA polymerase I transcription /// GO:0006361 - transcription initiation from RNA polymerase I promoter /// GO:0016042 - lipid catabolic process /// GO:0019433 - triglyceride catabolic process /// GO:0042758 - long-chain fatty acid catabolic process /// GO:0046340 - diacylglycerol catabolic process /// GO:0019433 - triglyceride catabolic process /// GO:0046340 - diacyl…	6044	29	6044	5.91736	0.176537	6.3223	5.56519	5.96582	1.17396	0.997419	2	8.6993	0.0207021	0.0220672	45.3162	8	0.117396	1	0.849622	24.0898	0.000283793	3.547	5.9511	0.378769	0.980002	-1.01886	0.0388626	0.75711	0.356475	-0.400635	6.88959	3.24387	-3.93783	8.43197e-05	0.0105579	0.00365259
212448_at	9330159F19Rik	RIKEN cDNA 9330159F19 gene	Mm.132789; Mm.379334	ENSMUSG00000004360	NA	10	29211643	212448	NM_001162537 /// NP_001156009 /// XM_006512646 /// XM_006512647 /// XM_006512648 /// XM_006512649 /// XM_006512650 /// XP_006512709 /// XP_006512710 /// XP_006512711 /// XP_006512712 /// XP_006512713	---	GO:0005575 - cellular_component	GO:0003674 - molecular_function	GO:0008150 - biological_process	8571	27	8571	4.54589	0.225301	5.12237	4.35254	4.30688	1.60031	1.37501	2	8.6993	0.0263075	0.0281627	35.508	8	0.160031	1	0.859214	26.1333	0.000209857	3.67808	4.59393	0.458208	1.15327	-0.526815	-0.626452	0.769827	0.815481	0.0456543	6.21433	6.58287	0.398067	0.000180202	0.000118252	0.700172
140742_at	Sesn1	sestrin 1	Mm.139418	ENSMUSG00000038332	NA	10	41810574; 41887439	140742	NM_001013370 /// NM_001162908 /// NP_001013388 /// NP_001156380	04115 : p53 signaling pathway	GO:0005634 - nucleus	GO:0003674 - molecular_function	GO:0051896 - regulation of protein kinase B signaling /// GO:1901031 - regulation of response to reactive oxygen species	4851	19	4851	7.82992	0.286719	8.33896	7.51538	7.7627	1.47789	1.19117	2	8.6993	0.0333676	0.0358399	27.9019	8	0.147789	1	0.805994	17.8492	0.000833659	3.07901	7.87234	0.422595	1.10416	-0.844694	-0.259466	0.823575	0.576261	-0.247314	5.90313	4.13046	-1.9147	0.000260625	0.00275143	0.088922
16601_at	Klf9	Kruppel-like factor 9	Mm.291595; Mm.392684	ENSMUSG00000033863	NA	19	23141226	16601	NM_010638 /// NP_034768	---	GO:0005634 - nucleus /// GO:0005886 - plasma membrane /// GO:0005634 - nucleus /// GO:0005737 - cytoplasm	GO:0003677 - DNA binding /// GO:0000977 - RNA polymerase II regulatory region sequence-specific DNA binding /// GO:0001228 - RNA polymerase II transcription regulatory region sequence-specific DNA binding transcription factor activity involved in positive regulation of transcription /// GO:0003676 - nucleic acid binding /// GO:0046872 - metal ion binding	GO:0006366 - transcription from RNA polymerase II promoter /// GO:0006355 - regulation of transcription, DNA-templated /// GO:0007566 - embryo implantation /// GO:0045944 - positive regulation of transcription from RNA polymerase II promoter /// GO:0050847 - progesterone receptor signaling pathway /// GO:0006351 - transcription, DNA-templated /// GO:0097067 - cellular response to thyroid hormone …	5903	23	5903	8.18145	0.140097	8.70567	7.87549	8.09424	1.36939	1.22929	2	8.6993	0.0165132	0.0175121	57.1034	8	0.136939	1	0.897694	37.2217	5.44336e-05	4.26413	8.22513	0.430291	1.11677	-0.812575	-0.304199	0.830182	0.611432	-0.21875	8.45863	6.22981	-2.4074	1.74843e-05	0.000176983	0.0403139
14766_at	Gpr56	G protein-coupled receptor 56	Mm.290834	ENSMUSG00000031785	NA	8	94977109; 94984399	14766	NM_001198894 /// NM_018882 /// NP_001185823 /// NP_061370 /// XM_006530678 /// XM_006530679 /// XM_006530680 /// XM_006530681 /// XM_006530682 /// XM_006530683 /// XM_006530684 /// XM_006530685 /// XM_006530686 /// XM_006530687 /// XM_006530688 /// XM_006530689 /// XM_006530690 /// XM_006530691 /// XM_006530692 /// XM_006530693 /// XM_006530694 /// XM_006530695 /// XM_006530696 /// XM_006530697 /…	---	GO:0097451 - glial limiting end-foot /// GO:0005886 - plasma membrane /// GO:0016021 - integral component of membrane /// GO:0016020 - membrane /// GO:0005576 - extracellular region /// GO:0005622 - intracellular /// GO:0070062 - extracellular vesicular exosome	GO:0005518 - collagen binding /// GO:0050840 - extracellular matrix binding /// GO:0004930 - G-protein coupled receptor activity /// GO:0004871 - signal transducer activity /// GO:0004888 - transmembrane signaling receptor activity	GO:0007186 - G-protein coupled receptor signaling pathway /// GO:0021801 - cerebral cortex radial glia guided migration /// GO:0021819 - layer formation in cerebral cortex /// GO:0035025 - positive regulation of Rho protein signal transduction /// GO:2001223 - negative regulation of neuron migration /// GO:0007155 - cell adhesion /// GO:0007165 - signal transduction /// GO:0007166 - cell surface …	5258	24	5258	7.02604	0.126069	7.64367	6.78223	6.80664	1.7008	1.57474	2	8.6993	0.0149006	0.0157586	63.4574	8	0.17008	1	0.925877	52.8413	1.35923e-05	4.86671	7.07751	0.490461	1.15434	-0.60206	-0.552283	0.861446	0.837032	-0.0244141	9.23991	8.97805	-0.282848	8.69472e-06	1.09273e-05	0.783908
17684_at	Cited2	Cbp/p300-interacting transactivator, wit	Mm.272321	ENSMUSG00000039910	NA	10	17723228	17684	NM_010828 /// NP_034958 /// XM_006512576 /// XP_006512639	---	GO:0005634 - nucleus /// GO:0005737 - cytoplasm /// GO:0000790 - nuclear chromatin /// GO:0005634 - nucleus /// GO:0005634 - nucleus /// GO:0005737 - cytoplasm	GO:0003713 - transcription coactivator activity /// GO:0003712 - transcription cofactor activity /// GO:0001105 - RNA polymerase II transcription coactivator activity /// GO:0003682 - chromatin binding /// GO:0003700 - sequence-specific DNA binding transcription factor activity /// GO:0003713 - transcription coactivator activity /// GO:0005515 - protein binding /// GO:0001102 - RNA polymerase II …	GO:0001666 - response to hypoxia /// GO:0007507 - heart development /// GO:0045892 - negative regulation of transcription, DNA-templated /// GO:0006355 - regulation of transcription, DNA-templated /// GO:0006357 - regulation of transcription from RNA polymerase II promoter /// GO:0007179 - transforming growth factor beta receptor signaling pathway /// GO:0045893 - positive regulation of transcrip…	6525	23	6525	8.234	0.253758	8.59369	7.73193	8.46631	1.86604	1.61228	2	8.6993	0.0295787	0.0317197	31.5261	8	0.186604	1	0.864013	27.2542	0.000179354	3.74629	8.26398	0.465145	0.70884	-1.14382	0.434985	0.861757	0.127382	-0.734375	6.5605	0.969753	-6.0387	0.000121258	0.358357	0.000221583
329152_at	Hecw2	HECT, C2 and WW domain containing E3 ubi	Mm.132150; Mm.447527	ENSMUSG00000042807	NA	1	-53806874; -53930815	329152	NM_001001883 /// NM_172655 /// NP_001001883 /// NP_766243 /// XM_006496066 /// XM_006496067 /// XM_006496068 /// XM_006496069 /// XP_006496129 /// XP_006496130 /// XP_006496131 /// XP_006496132	---	GO:0005634 - nucleus /// GO:0005737 - cytoplasm	GO:0004842 - ubiquitin-protein transferase activity /// GO:0008766 - UDP-N-acetylmuramoylalanyl-D-glutamyl-2,6-diaminopimelate-D-alanyl-D-alanine ligase activity /// GO:0016874 - ligase activity /// GO:0018169 - ribosomal S6-glutamic acid ligase activity /// GO:0043773 - coenzyme F420-0 gamma-glutamyl ligase activity /// GO:0043774 - coenzyme F420-2 alpha-glutamyl ligase activity /// GO:0070735 -…	GO:0042787 - protein ubiquitination involved in ubiquitin-dependent protein catabolic process	14584	30	14584	5.57102	0.0975146	6.07812	5.20776	5.55396	1.39797	1.30045	2	8.6993	0.0116182	0.0121893	82.039	8	0.139797	1	0.930245	55.9659	1.07847e-05	4.96719	5.61328	0.438203	1.0608	-0.92541	-0.135385	0.870361	0.52417	-0.346191	10.5723	6.36712	-4.54214	2.93889e-06	0.000151019	0.00152878
104158_at	Ces1d	carboxylesterase 1D	Mm.292803	ENSMUSG00000056973	3.1.1.1	8	-93166072	104158	NM_053200 /// NP_444430	00983 : Drug metabolism - other enzymes /// 01100 : Metabolic pathways	GO:0005783 - endoplasmic reticulum /// GO:0005829 - cytosol /// GO:0005788 - endoplasmic reticulum lumen /// GO:0005811 - lipid particle /// GO:0005737 - cytoplasm	GO:0004771 - sterol esterase activity /// GO:0004806 - triglyceride lipase activity /// GO:0052689 - carboxylic ester hydrolase activity /// GO:0052689 - carboxylic ester hydrolase activity /// GO:0052689 - carboxylic ester hydrolase activity /// GO:0016787 - hydrolase activity /// GO:0030339 - fatty-acyl-ethyl-ester synthase activity /// GO:0052689 - carboxylic ester hydrolase activity	GO:0006637 - acyl-CoA metabolic process /// GO:0009636 - response to toxic substance /// GO:0016042 - lipid catabolic process /// GO:0019626 - short-chain fatty acid catabolic process /// GO:0046464 - acylglycerol catabolic process /// GO:0034379 - very-low-density lipoprotein particle assembly /// GO:0016042 - lipid catabolic process /// GO:0006629 - lipid metabolic process /// GO:0030855 - epit…	2635	13	2635	6.29604	0.519062	6.47091	5.59302	6.86792	3.89595	3.37689	2	8.6993	0.0600759	0.0648827	15.4124	8	0.389595	1	0.866769	28.1052	0.000159778	3.79648	6.31062	0.652392	0.245703	-1.09995	0.854248	0.877893	-0.39701	-1.2749	4.68957	-2.12077	-7.356	0.00124613	0.0640042	5.14529e-05
194231_at	Cnksr1	connector enhancer of kinase suppressor	Mm.331958	ENSMUSG00000028841	NA	4	-134228042	194231	NM_001081047 /// NP_001074516	---	GO:0005938 - cell cortex	GO:0016301 - kinase activity /// GO:0016740 - transferase activity /// GO:0030674 - protein binding, bridging	GO:0016310 - phosphorylation /// GO:0007265 - Ras protein signal transduction /// GO:0007266 - Rho protein signal transduction	7523	32	7523	4.80519	0.328311	5.32931	4.42456	4.79272	1.73255	1.40424	2	8.6993	0.0381487	0.0410389	24.3671	8	0.173255	1	0.810504	18.4048	0.000748672	3.12571	4.84886	0.454979	1.05597	-0.932579	-0.12339	0.904748	0.536584	-0.368164	6.06498	3.59699	-2.66573	0.000214781	0.00610566	0.026554
18845_at	Plxna2	plexin A2	Mm.2251	ENSMUSG00000026640	NA	1	194619829	18845	NM_008882 /// NP_032908 /// XM_006497240 /// XP_006497303 /// XR_373891	04360 : Axon guidance	GO:0005887 - integral component of plasma membrane /// GO:0005886 - plasma membrane /// GO:0005622 - intracellular /// GO:0016021 - integral component of membrane /// GO:0016020 - membrane	GO:0017154 - semaphorin receptor activity /// GO:0017154 - semaphorin receptor activity /// GO:0017154 - semaphorin receptor activity /// GO:0004872 - receptor activity	GO:0007166 - cell surface receptor signaling pathway /// GO:0021935 - cerebellar granule cell precursor tangential migration /// GO:0030334 - regulation of cell migration /// GO:0051642 - centrosome localization /// GO:0071526 - semaphorin-plexin signaling pathway /// GO:0071526 - semaphorin-plexin signaling pathway /// GO:0007165 - signal transduction /// GO:0007275 - multicellular organismal de…	7140	18	7140	6.55156	0.225204	7.10215	6.18091	6.50928	1.69135	1.46614	2	8.6993	0.0262963	0.0281505	35.5234	8	0.169135	1	0.86685	27.8774	0.000164749	3.78318	6.59745	0.466909	1.08096	-0.892119	-0.188836	0.921246	0.592877	-0.328369	7.43823	4.78695	-2.86371	4.72766e-05	0.00109062	0.0193108
666385_at	Gm8075	predicted gene 8075	NA	NA	NA	12	NA	666385	XR_381689 /// XR_381690 /// XR_394590	---	-----	-----	-----	18756	18	18756	6.08075	0.263793	6.78078	5.85229	5.78418	2.29449	2.03069	2	8.6993	0.0307322	0.0329741	30.3268	8	0.229449	1	0.885032	33.0385	8.63398e-05	4.06379	6.13908	0.556765	1.15254	-0.515099	-0.63744	0.928482	0.996597	0.0681152	6.93454	7.44327	0.549493	8.03157e-05	4.7033e-05	0.596488
215748_at	Cnksr3	Cnksr family member 3	Mm.37984	ENSMUSG00000015202	NA	10	-7119062	215748	NM_172546 /// NP_766134	---	GO:0005575 - cellular_component /// GO:0016020 - membrane /// GO:0005737 - cytoplasm	GO:0003674 - molecular_function	GO:0010765 - positive regulation of sodium ion transport /// GO:0033137 - negative regulation of peptidyl-serine phosphorylation /// GO:0070373 - negative regulation of ERK1 and ERK2 cascade /// GO:2000651 - positive regulation of sodium ion transmembrane transporter activity /// GO:0009966 - regulation of signal transduction	8906	23	8906	6.34749	0.374872	6.82457	5.88574	6.45142	1.95375	1.57887	2	8.6993	0.043501	0.046859	21.3406	8	0.195375	1	0.808127	18.1476	0.000786621	3.10423	6.38724	0.472694	0.925186	-1.06094	0.135758	0.938832	0.373158	-0.565674	5.89359	2.34253	-3.83559	0.000263641	0.0447712	0.00425426
14219_at	Ctgf	connective tissue growth factor	Mm.390287	ENSMUSG00000019997	NA	10	24595442	14219	NM_010217 /// NP_034347	---	GO:0005576 - extracellular region /// GO:0005578 - proteinaceous extracellular matrix /// GO:0005829 - cytosol /// GO:0005615 - extracellular space /// GO:0043231 - intracellular membrane-bounded organelle /// GO:0005794 - Golgi apparatus /// GO:0005801 - cis-Golgi network /// GO:0005938 - cell cortex /// GO:0048471 - perinuclear region of cytoplasm	GO:0005178 - integrin binding /// GO:0008201 - heparin binding /// GO:0005520 - insulin-like growth factor binding /// GO:0001968 - fibronectin binding /// GO:0008083 - growth factor activity	GO:0001502 - cartilage condensation /// GO:0001525 - angiogenesis /// GO:0072593 - reactive oxygen species metabolic process /// GO:0007160 - cell-matrix adhesion /// GO:0007229 - integrin-mediated signaling pathway /// GO:0008543 - fibroblast growth factor receptor signaling pathway /// GO:0016477 - cell migration /// GO:0030154 - cell differentiation /// GO:0001503 - ossification /// GO:0001525…	4950	21	4950	7.07139	0.178086	7.90305	6.94019	6.57886	3.29229	3.11421	2	8.6993	0.0208801	0.0222608	44.922	8	0.329229	1	0.945908	74.5735	3.34872e-06	5.47512	7.1407	0.684491	1.11375	-0.292938	-0.820816	0.962868	1.3242	0.361328	8.72453	11.9985	3.53631	1.3706e-05	1.04232e-06	0.00670113
12608_at	Cebpb	CCAAT/enhancer binding protein (C/EBP),	Mm.439656	ENSMUSG00000056501	NA	2	167688915	12608	NM_001287738 /// NM_001287739 /// NM_009883 /// NP_001274667 /// NP_001274668 /// NP_034013	---	GO:0000779 - condensed chromosome, centromeric region /// GO:0000790 - nuclear chromatin /// GO:0005634 - nucleus /// GO:0005737 - cytoplasm /// GO:0016363 - nuclear matrix /// GO:0005634 - nucleus /// GO:0016363 - nuclear matrix	GO:0001077 - RNA polymerase II core promoter proximal region sequence-specific DNA binding transcription factor activity involved in positive regulation of transcription /// GO:0003677 - DNA binding /// GO:0003682 - chromatin binding /// GO:0003705 - RNA polymerase II distal enhancer sequence-specific DNA binding transcription factor activity /// GO:0042803 - protein homodimerization activity ///…	GO:0006366 - transcription from RNA polymerase II promoter /// GO:0045893 - positive regulation of transcription, DNA-templated /// GO:0045892 - negative regulation of transcription, DNA-templated /// GO:0071230 - cellular response to amino acid stimulus /// GO:0030182 - neuron differentiation /// GO:0043524 - negative regulation of neuron apoptotic process /// GO:0045408 - regulation of interleu…	4145	22	4145	5.91571	0.376016	6.56365	5.59668	5.74878	2.1541	1.77808	2	8.6993	0.0436325	0.047002	21.2757	8	0.21541	1	0.825441	20.3756	0.000521646	3.28262	5.9697	0.519967	1.14228	-0.717401	-0.424883	0.966974	0.814875	-0.1521	6.0611	5.10772	-1.02976	0.00021577	0.000709925	0.330899
68453_at	Gpihbp1	GPI-anchored HDL-binding protein 1	Mm.46367	ENSMUSG00000022579	NA	15	75596658	68453	NM_026730 /// NP_081006 /// XM_006521314 /// XM_006521315 /// XP_006521377 /// XP_006521378	---	GO:0005622 - intracellular /// GO:0046658 - anchored component of plasma membrane /// GO:0009897 - external side of plasma membrane /// GO:0009986 - cell surface /// GO:0016323 - basolateral plasma membrane /// GO:0016324 - apical plasma membrane /// GO:0005886 - plasma membrane /// GO:0016020 - membrane /// GO:0031225 - anchored component of membrane /// GO:0034364 - high-density lipoprotein par…	GO:0008035 - high-density lipoprotein particle binding /// GO:0008320 - protein transmembrane transporter activity /// GO:0071813 - lipoprotein particle binding /// GO:0035478 - chylomicron binding /// GO:0035473 - lipase binding /// GO:0008289 - lipid binding	GO:0006869 - lipid transport /// GO:0006886 - intracellular protein transport /// GO:0050821 - protein stabilization /// GO:0017038 - protein import /// GO:0045056 - transcytosis /// GO:0034394 - protein localization to cell surface /// GO:0051006 - positive regulation of lipoprotein lipase activity /// GO:0071806 - protein transmembrane transport /// GO:0042632 - cholesterol homeostasis /// GO:0…	20124	21	20124	8.28725	0.377522	8.79835	7.82251	8.36865	2.05164	1.67412	2	8.6993	0.0438055	0.0471902	21.1908	8	0.205164	1	0.815991	19.1086	0.000655765	3.18325	8.32984	0.489079	0.957955	-1.03732	0.0793603	0.975845	0.429702	-0.546143	6.10461	2.6881	-3.69026	0.000204949	0.0256132	0.00529678
21859_at	Timp3	tissue inhibitor of metalloproteinase 3	Mm.4871	ENSMUSG00000020044	NA	10	86300412	21859	NM_011595 /// NP_035725	---	GO:0005604 - basement membrane /// GO:0005576 - extracellular region /// GO:0005578 - proteinaceous extracellular matrix /// GO:0005634 - nucleus /// GO:0005737 - cytoplasm /// GO:0031012 - extracellular matrix /// GO:0070062 - extracellular vesicular exosome	GO:0004857 - enzyme inhibitor activity /// GO:0046872 - metal ion binding /// GO:0008191 - metalloendopeptidase inhibitor activity /// GO:0030414 - peptidase inhibitor activity	GO:0071310 - cellular response to organic substance /// GO:0010466 - negative regulation of peptidase activity /// GO:0045861 - negative regulation of proteolysis /// GO:0051045 - negative regulation of membrane protein ectodomain proteolysis	9314	18	9314	9.24789	0.38856	10.0209	9.03613	8.87988	2.90224	2.51368	2	8.6993	0.0450745	0.04857	20.5888	8	0.290224	1	0.866117	27.8836	0.00016461	3.78354	9.3123	0.61861	1.14546	-0.446436	-0.699019	0.98476	1.14101	0.15625	6.07305	7.03665	1.04081	0.000212738	7.19732e-05	0.326026
57752_at	Tacc2	transforming, acidic coiled-coil contain	Mm.86322	ENSMUSG00000030852	NA	7	130577484; 130692556; 130577484	57752	NM_001004468 /// NM_021314 /// NM_206856 /// NP_001004468 /// NP_067289 /// NP_996738 /// XM_006508064 /// XM_006508065 /// XM_006508066 /// XM_006508067 /// XM_006508068 /// XM_006508069 /// XM_006508070 /// XM_006508071 /// XM_006508072 /// XM_006508073 /// XM_006508074 /// XM_006508075 /// XM_006508076 /// XM_006508077 /// XM_006508078 /// XM_006508079 /// XM_006508080 /// XM_006508081 /// XM_…	---	GO:0005856 - cytoskeleton /// GO:0005634 - nucleus /// GO:0005737 - cytoplasm /// GO:0005730 - nucleolus /// GO:0005794 - Golgi apparatus	GO:0019904 - protein domain specific binding /// GO:0035257 - nuclear hormone receptor binding	GO:0030953 - astral microtubule organization /// GO:0000226 - microtubule cytoskeleton organization /// GO:0008283 - cell proliferation /// GO:0021987 - cerebral cortex development /// GO:0022008 - neurogenesis /// GO:0022027 - interkinetic nuclear migration /// GO:0032886 - regulation of microtubule-based process	17308	20	17308	8.23493	0.183953	8.65146	7.66089	8.49658	2.29638	2.11242	2	8.6993	0.0215545	0.0229942	43.4893	8	0.229638	1	0.919894	49.0018	1.83895e-05	4.73543	8.26964	0.532853	0.716546	-1.14244	0.425896	0.990567	0.154874	-0.835693	8.83398	1.38118	-8.04994	1.24207e-05	0.201664	2.57331e-05
14645_at	Glul	glutamate-ammonia ligase (glutamine synt	Mm.210745	ENSMUSG00000026473	6.3.1.2	1	153899945	14645	NM_008131 /// NP_032157	00250 : Alanine, aspartate and glutamate metabolism /// 00330 : Arginine and proline metabolism /// 00910 : Nitrogen metabolism /// 01100 : Metabolic pathways	GO:0005739 - mitochondrion /// GO:0005737 - cytoplasm /// GO:0044297 - cell body /// GO:0097386 - glial cell projection /// GO:0005634 - nucleus /// GO:0005737 - cytoplasm /// GO:0005791 - rough endoplasmic reticulum /// GO:0043231 - intracellular membrane-bounded organelle /// GO:0043005 - neuron projection /// GO:0042995 - cell projection /// GO:0043204 - perikaryon /// GO:0043234 - protein com…	GO:0005515 - protein binding /// GO:0000166 - nucleotide binding /// GO:0003824 - catalytic activity /// GO:0004351 - glutamate decarboxylase activity /// GO:0016829 - lyase activity /// GO:0016874 - ligase activity /// GO:0000287 - magnesium ion binding /// GO:0004356 - glutamate-ammonia ligase activity /// GO:0005524 - ATP binding /// GO:0016595 - glutamate binding /// GO:0042802 - identical pr…	GO:0009749 - response to glucose /// GO:0009267 - cellular response to starvation /// GO:0006807 - nitrogen compound metabolic process /// GO:0006536 - glutamate metabolic process /// GO:0006542 - glutamine biosynthetic process /// GO:0008283 - cell proliferation /// GO:0019676 - ammonia assimilation cycle /// GO:0032024 - positive regulation of insulin secretion /// GO:0051260 - protein homoolig…	5181	25	5181	9.47726	0.0653004	9.97846	8.94678	9.63184	2.04012	1.97482	2	8.6993	0.00791517	0.00816256	122.511	8	0.204012	1	0.967992	124.749	3.93809e-07	6.40471	9.51902	0.52501	0.875094	-1.08997	0.214877	1.03168	0.346621	-0.685059	15.1829	5.10112	-10.8896	1.4647e-07	0.00071612	2.3099e-06
17207_at	Mcf2l	mcf.2 transforming sequence-like	Mm.334413	ENSMUSG00000031442	NA	8	12949418; 12915893	17207	NM_001159485 /// NM_001159486 /// NM_178076 /// NP_001152957 /// NP_001152958 /// NP_835177 /// XM_006508706 /// XM_006508707 /// XM_006508708 /// XM_006508709 /// XM_006508710 /// XM_006508711 /// XM_006508712 /// XM_006508713 /// XM_006508714 /// XM_006508715 /// XM_006508716 /// XM_006508717 /// XM_006508718 /// XM_006508719 /// XM_006508720 /// XM_006508721 /// XM_006508722 /// XM_006508723 /…	---	GO:0005622 - intracellular /// GO:0016020 - membrane /// GO:0030027 - lamellipodium /// GO:0005886 - plasma membrane /// GO:0005737 - cytoplasm /// GO:0005615 - extracellular space	GO:0005089 - Rho guanyl-nucleotide exchange factor activity /// GO:0005545 - 1-phosphatidylinositol binding /// GO:0005515 - protein binding /// GO:0005085 - guanyl-nucleotide exchange factor activity	GO:0007266 - Rho protein signal transduction /// GO:0032321 - positive regulation of Rho GTPase activity /// GO:0045944 - positive regulation of transcription from RNA polymerase II promoter /// GO:0035556 - intracellular signal transduction /// GO:0035023 - regulation of Rho protein signal transduction	6398	31	6398	5.11697	0.144059	5.82863	4.7688	4.9314	2.28607	2.14201	2	8.6993	0.0169686	0.0180073	55.533	8	0.228607	1	0.936984	63.1172	6.62446e-06	5.17885	5.17627	0.570774	1.14293	-0.7139	-0.429028	1.05983	0.897232	-0.162598	10.6526	9.01828	-1.76525	2.76358e-06	1.05465e-05	0.112495
12048_at	Bcl2l1	BCL2-like 1	Mm.238213	ENSMUSG00000007659	NA	2	-152780668	12048	NM_001289716 /// NM_001289717 /// NM_001289739 /// NM_009743 /// NP_001276645 /// NP_001276646 /// NP_001276668 /// NP_033873 /// XM_006498608 /// XM_006498609 /// XM_006498610 /// XM_006498611 /// XM_006498612 /// XP_006498671 /// XP_006498672 /// XP_006498673 /// XP_006498674 /// XP_006498675 /// XR_374396	04210 : Apoptosis /// 04630 : Jak-STAT signaling pathway /// 05014 : Amyotrophic lateral sclerosis (ALS) /// 05145 : Toxoplasmosis /// 05200 : Pathways in cancer /// 05212 : Pancreatic cancer /// 05220 : Chronic myeloid leukemia /// 05222 : Small cell lung cancer	GO:0005622 - intracellular /// GO:0005739 - mitochondrion /// GO:0005829 - cytosol /// GO:0005741 - mitochondrial outer membrane /// GO:0031966 - mitochondrial membrane /// GO:0005622 - intracellular /// GO:0005741 - mitochondrial outer membrane /// GO:0016021 - integral component of membrane /// GO:0016020 - membrane /// GO:0005743 - mitochondrial inner membrane /// GO:0005856 - cytoskeleton ///…	GO:0005515 - protein binding /// GO:0046982 - protein heterodimerization activity /// GO:0042803 - protein homodimerization activity /// GO:0042802 - identical protein binding /// GO:0019901 - protein kinase binding /// GO:0043027 - cysteine-type endopeptidase inhibitor activity involved in apoptotic process /// GO:0046982 - protein heterodimerization activity /// GO:0051400 - BH domain binding /…	GO:0009615 - response to virus /// GO:0043066 - negative regulation of apoptotic process /// GO:0008283 - cell proliferation /// GO:0008284 - positive regulation of cell proliferation /// GO:0043065 - positive regulation of apoptotic process /// GO:0043524 - negative regulation of neuron apoptotic process /// GO:0046898 - response to cycloheximide /// GO:0071312 - cellular response to alkaloid //…	3825	27	3825	6.07267	0.34784	6.80682	5.72095	5.87378	2.61783	2.26999	2	8.6993	0.0403936	0.04348	22.9991	8	0.261783	1	0.867126	28.0983	0.000159925	3.79608	6.13385	0.587797	1.1449	-0.702455	-0.442447	1.08587	0.933039	-0.152832	7.07397	6.07834	-1.07541	6.91648e-05	0.00021141	0.311112
232431_at	Gprc5a	G protein-coupled receptor, family C, gr	Mm.23575; Mm.477015	ENSMUSG00000046733	NA	6	135065662	232431	NM_181444 /// NP_852109 /// XM_006506038 /// XP_006506101	---	GO:0016021 - integral component of membrane /// GO:0016020 - membrane /// GO:0005886 - plasma membrane /// GO:0043231 - intracellular membrane-bounded organelle /// GO:0070062 - extracellular vesicular exosome	GO:0003674 - molecular_function /// GO:0004871 - signal transducer activity /// GO:0004930 - G-protein coupled receptor activity	GO:0008150 - biological_process /// GO:0007165 - signal transduction /// GO:0007186 - G-protein coupled receptor signaling pathway	10721	20	10721	3.73199	0.391954	4.53226	3.43469	3.42908	3.0338	2.64185	2	8.6993	0.0454646	0.0489943	20.4106	8	0.30338	1	0.870804	29.0539	0.000140958	3.85091	3.79868	0.635306	1.15469	-0.572925	-0.581764	1.09756	1.10318	0.00561523	6.73961	6.77409	0.0372431	9.93478e-05	9.56496e-05	0.971132
223513_at	Abra	actin-binding Rho activating protein	Mm.148913	ENSMUSG00000042895	NA	15	-41865293	223513	NM_175456 /// NP_780665	---	GO:0015629 - actin cytoskeleton /// GO:0030016 - myofibril /// GO:0005737 - cytoplasm /// GO:0005856 - cytoskeleton /// GO:0005886 - plasma membrane /// GO:0030017 - sarcomere	GO:0003713 - transcription coactivator activity /// GO:0003779 - actin binding	GO:0000060 - protein import into nucleus, translocation /// GO:0045893 - positive regulation of transcription, DNA-templated /// GO:0035025 - positive regulation of Rho protein signal transduction /// GO:0045944 - positive regulation of transcription from RNA polymerase II promoter /// GO:0051091 - positive regulation of sequence-specific DNA binding transcription factor activity /// GO:0045944 -…	9656	21	9655	8.55311	0.352807	9.25397	8.10303	8.47754	2.65954	2.30674	2	8.6993	0.0409645	0.0441008	22.6753	8	0.265954	1	0.867343	28.1553	0.000158709	3.7994	8.61151	0.587048	1.09438	-0.866169	-0.228212	1.15094	0.776426	-0.374512	7.44543	5.02271	-2.61684	4.69292e-05	0.000794333	0.0287348
102637059_at	LOC102637059	uncharacterized LOC102637059	Mm.383718	NA	NA	11	NA	102637059	XR_389172 /// XR_389173 /// XR_393684 /// XR_393685	---	-----	-----	-----	2190	18	2190	5.79298	0.612743	6.66705	5.49023	5.44019	3.76922	3.15648	2	8.6993	0.0708447	0.0765929	13.056	8	0.376922	1	0.837435	22.2774	0.000377915	3.42261	5.86582	0.694335	1.15395	-0.540934	-0.613016	1.17682	1.22687	0.0500488	5.78891	6.03511	0.265923	0.000299369	0.000222531	0.796494
67246_at	2810474O19Rik	RIKEN cDNA 2810474O19 gene	Mm.333515	ENSMUSG00000032712	NA	6	149309414	67246	NM_001289661 /// NM_001289662 /// NM_026054 /// NP_001276590 /// NP_001276591 /// NP_080330 /// XM_006507081 /// XM_006507082 /// XM_006507083 /// XM_006507084 /// XM_006507085 /// XM_006507086 /// XM_006536097 /// XM_006536098 /// XM_006536099 /// XM_006536100 /// XM_006536101 /// XM_006536102 /// XP_006507144 /// XP_006507145 /// XP_006507146 /// XP_006507147 /// XP_006507148 /// XP_006507149 /…	---	GO:0005575 - cellular_component	GO:0003674 - molecular_function	GO:0008150 - biological_process	19368	25	19368	7.1726	0.452119	7.96946	6.78418	6.96338	3.13565	2.68353	2	8.6993	0.0523807	0.0565149	17.6944	8	0.313565	1	0.855813	25.6157	0.000226088	3.64572	7.23901	0.638906	1.14329	-0.711884	-0.431405	1.18528	1.00608	-0.179199	6.78074	5.75558	-1.1073	9.49537e-05	0.000311826	0.29784
75750_at	Slc10a6	solute carrier family 10 (sodium/bile ac	Mm.7446	ENSMUSG00000029321	NA	5	-103605711	75750	NM_029415 /// NP_083691 /// XM_006535278 /// XP_006535341	---	GO:0016021 - integral component of membrane /// GO:0016020 - membrane	GO:0008508 - bile acid:sodium symporter activity /// GO:0015293 - symporter activity /// GO:0043250 - sodium-dependent organic anion transmembrane transporter activity	GO:0006810 - transport /// GO:0006811 - ion transport /// GO:0006814 - sodium ion transport /// GO:0034220 - ion transmembrane transport /// GO:0043251 - sodium-dependent organic anion transport	23434	28	23434	4.14249	0.549776	4.97298	3.72742	3.93469	3.48079	2.93101	2	8.6993	0.0636065	0.068722	14.5514	8	0.348079	1	0.842054	23.0402	0.000334227	3.47596	4.2117	0.667388	1.14069	-0.725635	-0.415058	1.24556	1.03829	-0.207275	6.46632	5.39025	-1.16228	0.000134862	0.000492355	0.276013
94242_at	Tinagl1	tubulointerstitial nephritis antigen-lik	Mm.15801	ENSMUSG00000028776	NA	4	-130165600; -130165600	94242	NM_001168333 /// NM_023476 /// NP_001161805 /// NP_075965	---	GO:0005737 - cytoplasm /// GO:0005576 - extracellular region /// GO:0031012 - extracellular matrix /// GO:0070062 - extracellular vesicular exosome	GO:0043236 - laminin binding /// GO:0008234 - cysteine-type peptidase activity /// GO:0005044 - scavenger receptor activity /// GO:0030247 - polysaccharide binding	GO:0006508 - proteolysis /// GO:0006955 - immune response	24816	26	24816	7.46902	0.255633	8.2458	6.95898	7.39648	3.12738	2.87174	2	8.6993	0.0297942	0.0319541	31.2949	8	0.312738	1	0.91826	48.193	1.9653e-05	4.70657	7.53376	0.654297	1.08826	-0.878456	-0.209799	1.28681	0.849313	-0.4375	9.76093	6.44234	-3.58449	5.60486e-06	0.000138587	0.00622362
66277_at	Klf15	Kruppel-like factor 15	Mm.41389	ENSMUSG00000030087	NA	6	90462626	66277	NM_023184 /// NP_075673 /// XM_006506471 /// XM_006506472 /// XP_006506534 /// XP_006506535 /// XR_377485	---	GO:0005634 - nucleus /// GO:0005634 - nucleus	GO:0003677 - DNA binding /// GO:0003677 - DNA binding /// GO:0003700 - sequence-specific DNA binding transcription factor activity /// GO:0044212 - transcription regulatory region DNA binding /// GO:0005515 - protein binding /// GO:0003676 - nucleic acid binding /// GO:0046872 - metal ion binding	GO:0010001 - glial cell differentiation /// GO:0015758 - glucose transport /// GO:0045893 - positive regulation of transcription, DNA-templated /// GO:0010468 - regulation of gene expression /// GO:0014898 - cardiac muscle hypertrophy in response to stress /// GO:0072112 - glomerular visceral epithelial cell differentiation /// GO:2000757 - negative regulation of peptidyl-lysine acetylation /// G…	18432	19	18432	6.02572	0.382483	6.64998	5.32642	6.25684	3.72133	3.33885	2	8.6993	0.0443759	0.0478104	20.9159	8	0.372133	1	0.897219	37.6201	5.22213e-05	4.28215	6.07774	0.679712	0.841876	-1.10536	0.263484	1.32356	0.39314	-0.93042	8.22644	2.44352	-6.24627	2.17367e-05	0.0380266	0.000173628
18787_at	Serpine1	serine (or cysteine) peptidase inhibitor	Mm.250422	ENSMUSG00000037411	NA	5	-137061506	18787	NM_008871 /// NP_032897	04115 : p53 signaling pathway /// 04610 : Complement and coagulation cascades /// 05142 : Chagas disease (American trypanosomiasis)	GO:0005615 - extracellular space /// GO:0005576 - extracellular region /// GO:0005615 - extracellular space /// GO:0031012 - extracellular matrix /// GO:0042583 - chromaffin granule /// GO:0070062 - extracellular vesicular exosome	GO:0004867 - serine-type endopeptidase inhibitor activity /// GO:0005515 - protein binding /// GO:0030414 - peptidase inhibitor activity /// GO:0002020 - protease binding /// GO:0005102 - receptor binding /// GO:0004867 - serine-type endopeptidase inhibitor activity	GO:0010951 - negative regulation of endopeptidase activity /// GO:0045765 - regulation of angiogenesis /// GO:0050829 - defense response to Gram-negative bacterium /// GO:0010757 - negative regulation of plasminogen activation /// GO:0045766 - positive regulation of angiogenesis /// GO:0061044 - negative regulation of vascular wound healing /// GO:0042127 - regulation of cell proliferation /// GO…	7108	28	7108	6.89828	0.350172	8.0082	6.67456	6.28955	5.72833	5.37816	2	8.6993	0.0406617	0.0437715	22.8459	8	0.572833	1	0.93887	66.133	5.47699e-06	5.26146	6.99077	0.901902	1.12809	-0.350602	-0.777489	1.33364	1.71865	0.38501	8.65938	11.1593	2.70019	1.45403e-05	1.8914e-06	0.0251186
63954_at	Rbp7	retinol binding protein 7, cellular	Mm.46023	ENSMUSG00000028996	NA	4	-149449702	63954	NM_022020 /// NP_071303 /// XM_006535960 /// XM_006535961 /// XM_006539085 /// XM_006539086 /// XM_006539087 /// XP_006536023 /// XP_006536024 /// XP_006539148 /// XP_006539149 /// XP_006539150	---	GO:0005737 - cytoplasm	GO:0005501 - retinoid binding /// GO:0005215 - transporter activity /// GO:0008289 - lipid binding /// GO:0016918 - retinal binding /// GO:0019841 - retinol binding	GO:0006810 - transport	18056	18	18057	6.68279	0.765712	7.41341	6.04907	6.76855	4.00295	3.23724	2	8.6993	0.0884287	0.095714	10.4478	8	0.400295	1	0.808713	18.3042	0.000763234	3.11734	6.74368	0.68251	0.981278	-1.01773	0.0364467	1.36434	0.644857	-0.719482	6.00713	2.83928	-3.42167	0.000230067	0.0200827	0.00799892
218215_at	Rnf144b	ring finger protein 144B	Mm.287609	ENSMUSG00000038068	NA	13	47122720; 47194003	218215	NM_001170643 /// NM_146042 /// NP_001164114 /// NP_666154	---	GO:0016021 - integral component of membrane /// GO:0016020 - membrane /// GO:0005739 - mitochondrion /// GO:0005737 - cytoplasm /// GO:0031966 - mitochondrial membrane	GO:0046872 - metal ion binding /// GO:0008270 - zinc ion binding /// GO:0008766 - UDP-N-acetylmuramoylalanyl-D-glutamyl-2,6-diaminopimelate-D-alanyl-D-alanine ligase activity /// GO:0016874 - ligase activity /// GO:0018169 - ribosomal S6-glutamic acid ligase activity /// GO:0043773 - coenzyme F420-0 gamma-glutamyl ligase activity /// GO:0043774 - coenzyme F420-2 alpha-glutamyl ligase activity ///…	GO:0006915 - apoptotic process /// GO:0042787 - protein ubiquitination involved in ubiquitin-dependent protein catabolic process	9260	29	9259	6.46052	0.575172	7.32919	5.93335	6.33618	4.01241	3.43724	2	8.6993	0.0665258	0.0718965	13.9089	8	0.401241	1	0.856652	25.8339	0.000219064	3.65943	6.53291	0.718414	1.10839	-0.834557	-0.273833	1.39584	0.993009	-0.402832	7.08569	5.0408	-2.20874	6.83078e-05	0.0007755	0.0555604
72750_at	Fam117b	family with sequence similarity 117, mem	Mm.258250	ENSMUSG00000041040	NA	1	59913006	72750	NM_001037725 /// NP_001032814	---	GO:0005575 - cellular_component	GO:0003674 - molecular_function	GO:0008150 - biological_process	22147	26	22147	7.14135	0.301366	8.06223	6.63037	6.96167	4.01898	3.71762	2	8.6993	0.0350513	0.0376707	26.5458	8	0.401898	1	0.925014	53.0311	1.33979e-05	4.87296	7.21809	0.749581	1.12615	-0.784065	-0.342087	1.43186	1.10056	-0.331299	10.0136	7.6967	-2.50255	4.56216e-06	3.63964e-05	0.0345642
213393_at	8430408G22Rik	RIKEN cDNA 8430408G22 gene	Mm.38231	ENSMUSG00000048489	NA	6	116650684	213393	NM_001166580 /// NM_145980 /// NP_001160052 /// NP_666092	---	GO:0005739 - mitochondrion /// GO:0005739 - mitochondrion	GO:0003674 - molecular_function	GO:0008150 - biological_process	8651	18	8650	8.60238	0.616619	9.73899	8.2998	8.05249	6.068	5.45138	2	8.6993	0.0712902	0.0770774	12.974	8	0.6068	1	0.898382	38.2337	4.90264e-05	4.30957	8.6971	0.910742	1.14401	-0.436227	-0.70778	1.43919	1.6865	0.247314	7.05738	8.27015	1.30993	7.03978e-05	2.08561e-05	0.223751
268807_at	Klhl38	kelch-like 38	Mm.124498	ENSMUSG00000022357	NA	15	-58314573	268807	NM_177755 /// NP_808423 /// XM_006521018 /// XP_006521081	---	GO:0005575 - cellular_component	GO:0003674 - molecular_function	GO:0008150 - biological_process	13295	20	13295	7.10248	0.786182	7.85721	6.40918	7.22974	4.48249	3.69631	2	8.6993	0.0907818	0.0982727	10.1758	8	0.448249	1	0.824611	20.3582	0.000523246	3.28129	7.16538	0.72616	0.952735	-1.04136	0.0886298	1.44804	0.627478	-0.820557	6.29247	2.72672	-3.85145	0.000164575	0.0240672	0.0041544
666907_at	Ms4a4a	membrane-spanning 4-domains, subfamily A	NA	NA	NA	19	NA	666907	XM_006543453 /// XM_986941 /// XP_006543516 /// XP_992035	---	GO:0005575 - cellular_component	GO:0003674 - molecular_function	GO:0008150 - biological_process	18819	20	18818	5.12202	0.570335	6.2534	4.7417	4.65381	5.86588	5.29555	2	8.6993	0.0659698	0.0712919	14.0268	8	0.586588	1	0.902771	40.1361	4.05385e-05	4.39213	5.2163	0.899229	1.15332	-0.52779	-0.62553	1.5117	1.59959	0.0878906	7.70612	8.15415	0.483933	3.60559e-05	2.32841e-05	0.640382
12575_at	Cdkn1a	cyclin-dependent kinase inhibitor 1A (P2	Mm.195663	ENSMUSG00000023067	NA	17	29093772; 29090986	12575	NM_001111099 /// NM_007669 /// NP_001104569 /// NP_031695	04012 : ErbB signaling pathway /// 04110 : Cell cycle /// 04115 : p53 signaling pathway /// 05160 : Hepatitis C /// 05200 : Pathways in cancer /// 05214 : Glioma /// 05215 : Prostate cancer /// 05218 : Melanoma /// 05219 : Bladder cancer /// 05220 : Chronic myeloid leukemia	GO:0005829 - cytosol /// GO:0005634 - nucleus /// GO:0005737 - cytoplasm /// GO:0005622 - intracellular /// GO:0000307 - cyclin-dependent protein kinase holoenzyme complex /// GO:0000307 - cyclin-dependent protein kinase holoenzyme complex /// GO:0005634 - nucleus /// GO:0005737 - cytoplasm /// GO:0043231 - intracellular membrane-bounded organelle /// GO:0048471 - perinuclear region of cytoplasm …	GO:0004861 - cyclin-dependent protein serine/threonine kinase inhibitor activity /// GO:0030332 - cyclin binding /// GO:0005515 - protein binding /// GO:0004860 - protein kinase inhibitor activity /// GO:0046872 - metal ion binding /// GO:0016301 - kinase activity /// GO:0016740 - transferase activity /// GO:0019912 - cyclin-dependent protein kinase activating kinase activity /// GO:0031625 - ubi…	GO:0051726 - regulation of cell cycle /// GO:0007050 - cell cycle arrest /// GO:0045736 - negative regulation of cyclin-dependent protein serine/threonine kinase activity /// GO:0071850 - mitotic cell cycle arrest /// GO:0000079 - regulation of cyclin-dependent protein serine/threonine kinase activity /// GO:0006974 - cellular response to DNA damage stimulus /// GO:0007346 - regulation of mitotic…	4128	20	4128	6.98924	1.32456	8.35183	6.625	6.33154	9.15545	7.83089	2	8.6993	0.15267	0.16557	6.03973	8	0.915545	1	0.855325	25.6465	0.000225078	3.64767	7.10279	1.09161	1.14422	-0.437695	-0.706526	1.72683	2.02029	0.293457	5.78648	6.76984	1.06214	0.000300258	9.60976e-05	0.316765
22229_at	Ucp3	uncoupling protein 3 (mitochondrial, pro	Mm.6254	ENSMUSG00000032942	NA	7	100472991	22229	NM_009464 /// NP_033490	---	GO:0005739 - mitochondrion /// GO:0005739 - mitochondrion /// GO:0016021 - integral component of membrane /// GO:0016020 - membrane /// GO:0005743 - mitochondrial inner membrane /// GO:0031966 - mitochondrial membrane /// GO:0005739 - mitochondrion	GO:0017077 - oxidative phosphorylation uncoupler activity	GO:0000303 - response to superoxide /// GO:0006631 - fatty acid metabolic process /// GO:0015992 - proton transport /// GO:0055085 - transmembrane transport /// GO:0006810 - transport /// GO:0006839 - mitochondrial transport /// GO:0000303 - response to superoxide /// GO:0001666 - response to hypoxia	9563	16	9563	5.69405	1.32432	6.86778	4.89746	5.61035	8.02348	6.69916	2	8.6993	0.152642	0.16554	6.04084	8	0.802348	1	0.834945	21.9441	0.000399202	3.39881	5.79186	0.997622	1.07848	-0.896535	-0.181945	1.97032	1.25743	-0.712891	6.603	4.21394	-2.58049	0.000115617	0.0024375	0.0304727
53608_at	Map3k6	mitogen-activated protein kinase kinase	Mm.36640	ENSMUSG00000028862	2.7.11.25	4	133240818	53608	NM_016693 /// NP_057902 /// XM_006539040 /// XM_006539041 /// XP_006539103 /// XP_006539104	04010 : MAPK signaling pathway	GO:0005737 - cytoplasm	GO:0005515 - protein binding /// GO:0004709 - MAP kinase kinase kinase activity /// GO:0000166 - nucleotide binding /// GO:0004672 - protein kinase activity /// GO:0004674 - protein serine/threonine kinase activity /// GO:0046872 - metal ion binding /// GO:0016301 - kinase activity /// GO:0016740 - transferase activity /// GO:0016772 - transferase activity, transferring phosphorus-containing grou…	GO:0000165 - MAPK cascade /// GO:0000186 - activation of MAPKK activity /// GO:0035556 - intracellular signal transduction /// GO:0006468 - protein phosphorylation /// GO:0006950 - response to stress /// GO:0016310 - phosphorylation /// GO:0000186 - activation of MAPKK activity /// GO:0006468 - protein phosphorylation	16379	24	16379	4.72477	0.821496	6.19833	4.15784	4.18652	9.78013	8.95864	2	8.6993	0.0948412	0.102687	9.73833	8	0.978013	1	0.916004	47.2297	2.13002e-05	4.67162	4.84756	1.16989	1.15461	-0.589567	-0.565046	2.04049	2.01181	-0.0286865	8.67518	8.55322	-0.131733	1.43329e-05	1.60225e-05	0.898192
268709_at	Fam107a	family with sequence similarity 107, mem	Mm.256058; Mm.472988	ENSMUSG00000021750	NA	14	-8296278	268709	NM_183187 /// NP_899010 /// XM_006518019 /// XM_006518020 /// XM_006518021 /// XM_006518022 /// XM_006518023 /// XP_006518082 /// XP_006518083 /// XP_006518084 /// XP_006518085 /// XP_006518086	---	GO:0043005 - neuron projection /// GO:0005634 - nucleus /// GO:0043005 - neuron projection	GO:0003674 - molecular_function	GO:0001558 - regulation of cell growth	13275	25	13275	4.97392	1.07772	6.45188	4.3916	4.44775	10.0946	9.0169	2	8.6993	0.124295	0.134715	7.42307	8	1.00946	1	0.893238	36.2722	6.01879e-05	4.22049	5.09708	1.17363	1.15437	-0.601108	-0.553263	2.06028	2.00413	-0.0561523	7.65141	7.44287	-0.225246	3.80846e-05	4.70521e-05	0.82699
235320_at	Zbtb16	zinc finger and BTB domain containing 16	Mm.457803	ENSMUSG00000066687	NA	9	-48654297	235320	NM_001033324 /// NP_001028496 /// XM_006510258 /// XP_006510321	05200 : Pathways in cancer /// 05221 : Acute myeloid leukemia	GO:0016607 - nuclear speck /// GO:0005634 - nucleus /// GO:0005886 - plasma membrane /// GO:0005829 - cytosol /// GO:0005634 - nucleus /// GO:0016604 - nuclear body /// GO:0016605 - PML body /// GO:0016607 - nuclear speck /// GO:0017053 - transcriptional repressor complex	GO:0005515 - protein binding /// GO:0046872 - metal ion binding /// GO:0003677 - DNA binding /// GO:0003690 - double-stranded DNA binding /// GO:0003700 - sequence-specific DNA binding transcription factor activity /// GO:0008022 - protein C-terminus binding /// GO:0042802 - identical protein binding /// GO:0019904 - protein domain specific binding /// GO:0042803 - protein homodimerization activi…	GO:0001823 - mesonephros development /// GO:0007417 - central nervous system development /// GO:0030097 - hemopoiesis /// GO:0045638 - negative regulation of myeloid cell differentiation /// GO:0001501 - skeletal system development /// GO:0006355 - regulation of transcription, DNA-templated /// GO:0009880 - embryonic pattern specification /// GO:0008285 - negative regulation of cell proliferation…	11029	18	11029	6.73592	0.914736	8.11799	6.02759	6.40771	9.08287	8.16814	2	8.6993	0.105559	0.114342	8.74569	8	0.908287	1	0.89929	38.6898	4.68064e-05	4.3297	6.8511	1.1135	1.13776	-0.739568	-0.398187	2.0904	1.71027	-0.380127	8.42408	6.89221	-1.65461	1.80544e-05	8.40808e-05	0.133556
14229_at	Fkbp5	FK506 binding protein 5	Mm.276405	ENSMUSG00000024222	NA	17	-28399095	14229	NM_010220 /// NP_034350	---	GO:0005789 - endoplasmic reticulum membrane /// GO:0005634 - nucleus /// GO:0005737 - cytoplasm	GO:0005515 - protein binding /// GO:0003755 - peptidyl-prolyl cis-trans isomerase activity /// GO:0005528 - FK506 binding /// GO:0016853 - isomerase activity	GO:0000413 - protein peptidyl-prolyl isomerization /// GO:0061077 - chaperone-mediated protein folding /// GO:0006457 - protein folding	4956	15	4956	6.20386	1.31052	7.97633	5.49072	5.58765	14.2886	12.978	2	8.6993	0.151056	0.163815	6.10443	8	1.42886	1	0.908282	42.9578	3.10239e-05	4.5083	6.35156	1.40792	1.15402	-0.611429	-0.542587	2.4856	2.38868	-0.0969238	8.37345	8.04694	-0.352677	1.89271e-05	2.58076e-05	0.732724
27273_at	Pdk4	pyruvate dehydrogenase kinase, isoenzyme	Mm.235547	ENSMUSG00000019577	NA	6	-5483351	27273	NM_013743 /// NP_038771	---	GO:0005739 - mitochondrion /// GO:0005743 - mitochondrial inner membrane /// GO:0005739 - mitochondrion	GO:0004712 - protein serine/threonine/tyrosine kinase activity /// GO:0000166 - nucleotide binding /// GO:0004674 - protein serine/threonine kinase activity /// GO:0016301 - kinase activity /// GO:0016740 - transferase activity /// GO:0004672 - protein kinase activity /// GO:0004740 - pyruvate dehydrogenase (acetyl-transferring) kinase activity /// GO:0005524 - ATP binding	GO:0006086 - acetyl-CoA biosynthetic process from pyruvate /// GO:0006468 - protein phosphorylation /// GO:0006885 - regulation of pH /// GO:0008286 - insulin receptor signaling pathway /// GO:0010510 - regulation of acetyl-CoA biosynthetic process from pyruvate /// GO:0010565 - regulation of cellular ketone metabolic process /// GO:0010906 - regulation of glucose metabolic process /// GO:0042304…	13619	20	13619	9.86423	1.42963	11.12	8.46533	10.3213	14.824	13.3944	2	8.6993	0.164747	0.178704	5.59585	8	1.4824	1	0.90356	40.6512	3.85585e-05	4.41388	9.96888	1.36198	0.845198	-1.10394	0.258745	2.6547	0.798739	-1.85596	8.56342	2.57654	-6.46657	1.5873e-05	0.0306674	0.000134825
110595_at	Timp4	tissue inhibitor of metalloproteinase 4	Mm.255607	ENSMUSG00000030317	NA	6	-115245616	110595	NM_080639 /// NP_542370 /// XM_006505367 /// XP_006505430	---	GO:0005576 - extracellular region /// GO:0005615 - extracellular space /// GO:0030017 - sarcomere	GO:0004857 - enzyme inhibitor activity /// GO:0046872 - metal ion binding /// GO:0008191 - metalloendopeptidase inhibitor activity /// GO:0030414 - peptidase inhibitor activity	GO:0010466 - negative regulation of peptidase activity	3229	19	3229	6.02348	1.26692	7.83706	4.89331	5.79346	16.4549	15.188	2	8.6993	0.146043	0.158364	6.31455	8	1.64549	1	0.923007	51.9985	1.44991e-05	4.83866	6.17461	1.50844	1.1021	-0.849423	-0.252681	2.94375	2.0436	-0.900146	10.0856	7.00162	-3.3311	4.30576e-06	7.4723e-05	0.00920973
[truncated: 13 more columns]
